# Supplementary material
Source: Frontiers journal article supplement (https://www.frontiersin.org/articles/480727)
Supplement: Table_1.XLSX [file Table_1.XLSX]

## Sheet: paper_classification
Full text screening of papers identified as potentially useful from abstracts. Paper codes given to papers from which data was extracted, and are consistent across tables. 1= contained within paper, 0=not contained within paper
	Publication Data				Paper Type				Pathogen Type						Outcome				Management type																		Other exclusions
paper_code	authors	year	title	publication	orchard	review	model	temperate	insect	nematode	fungi	oomycete	virus	bacteria	exposure_risk	resistance	recovery	spread_risk	bark_damage	tree_vigour	humidity_heat	crown	regeneration	tree_characteristics	tree_diversity	connectivity	conduit	innoculum_removal	non_tree_veg	felled	tree_spacing	vectors	landscape	soil	fire	irrigation	chemical/biological	health	breeding	access
	Bendz-Hellgren, M. and Stenlid, J.	1998	Effects of clear-cutting, thinning, and wood moisture content on the susceptibility of Norway spruce stumps to Heterobasidion annosum	Canadian Journal of Forest Research	0	0	0	1	0	0	1	0	0	0	1	0	0	0	0	0	0	0	0	0	0	0	0	1	0	0	0	0	0	0	0	0	0	0	0	1
oliva2008	Oliva, J., Samils, N., Johansson, U., Bendz-Hellgren, M. and Stenlid, J	2008	Urea treatment reduced Heterobasidion annosum sl root rot in Picea abies after 15 years	Forest Ecology and Management	0	0	0	1	0	0	1	0	0	0	1	1	0	0	0	0	0	0	0	0	0	0	0	1	0	1	0	0	0	0	0	0	0	0	0	1
swedjemark1993	Swedjemark, G. and Stenlid, J	1993	Population dynamics of the root rot fungus Heterobasidion annosum following thinning of Picea abies	Oikos	0	0	0	1	0	0	1	0	0	0	0	1	0	0	0	0	0	0	0	0	0	0	0	0	0	0	1	0	0	0	0	0	0	0	0	1
lygis2004	Lygis, V., Vasiliauskas, R., Stenlid, J. and Vasiliauskas, A.	2004	Silvicultural and pathological evaluation of Scots pine afforestations mixed with deciduous trees to reduce the infections by Heterobasidion annosum ss	Forest Ecology and Management	0	0	0	1	0	0	1	0	0	0	0	0	0	0	0	0	0	0	0	0	1	0	0	0	0	0	0	0	0	0	0	0	0	0	0	1
oliva2010	Oliva, J., Thor, M. and Stenlid, J	2010	Long-term effects of mechanized stump treatment against Heterobasidion annosum root rot in Picea abies	Canadian Journal of Forest Research	0	0	0	1	0	0	1	0	0	0	0	1	0	0	0	0	0	0	0	0	0	0	0	0	0	0	0	0	1	0	0	0	0	0	0	1
amorini2000	E. Amorini, M. C. Manetti, T. Turchetti, A. Sansotta and F. Villani	2001	Impact of silvicultural system on Cryphonectria parasitica incidence and on genetic variability in a chestnut coppice in Central Italy	Forest Ecology and Management	0	0	0	1	0	0	1	0	0	0	0	0	1	1	0	0	0	0	0	0	0	0	0	0	0	0	1	0	0	0	0	0	0	0	0	1
baleshta2005	K.E. Baleshat, S.W. Simard, R.D. Guy and C.P. Chanway	2005	Reducaing paper birch density increases Douglas-fir growth rates and Armillaria root disease incidence in southern interior British Colombia	Forest Ecology and Management	0	0	0	1	0	0	1	0	0	0	1	0	0	0	0	0	0	0	0	0	1	0	0	0	0	0	0	0	0	0	0	0	0	0	0	1
bauman2014	J. M. Bauman, C. H. Keiffer and B. C. McCarthy	2014	Growth performance and chestnut blight incidence (Cryphonectria parasitica) of backcrossed chestnut seedlings in surface mine restoration	New Forests	0	0	0	1	0	0	1	0	0	0	0	1	0	0	0	0	0	0	0	0	0	0	0	0	0	0	0	0	0	1	0	0	0	0	0	1
begley2009	D. Begley, A.R. McCracken, W.M. Dawson and S. Watson	2009	Interaction in Short Rotation Coppice willow, Salix viminalis genotype mixtures	Biomass and Bioenergy	0	0	0	1	0	0	1	0	0	0	0	0	1	0	0	0	0	0	0	0	1	0	0	0	0	0	0	0	0	0	0	0	0	0	0	1
beh2012	M. M. Beh, M. R. Metz, K. M. Frangioso and D. M. Rizzo	2012	The key host for an invasive forest pathogen also facilitates the pathogen's survival of wildfire in California forests	New Phytologist	0	0	0	1	0	0	0	1	0	0	1	0	0	0	0	0	0	0	0	0	0	0	0	0	0	0	0	0	0	0	1	0	0	0	0	1
benedict1981	W.V. Benedict	1981	History of white pine blister rust control- A personal account	United States Department of Agriculture Forest Service	0	0	0	1	0	0	1	0	0	0																										1
bergdahl2002	D. R. Bergdahl, P. E. Sendak, D. R. Tobi, J. R. Bove and L. M. Tritton	2002	Incidence of annual canker of sugar maple studied with the aid of a geographic information system	Northern Journal of Applied Forestry	0	0	0	1	0	0	1	0	0	0	1	0	0	0	0	0	0	0	0	0	0	0	0	0	0	0	1	0	0	0	0	0	0	0	0	1
bezos2012	D. Bezos, J. M. Lomba, P. Martinez-Alvarez, M. Fernandez and J. J. Diez	2012	Effects of pruning in Monterrey pine plantations affected by Fusarium circinatum	Forest Systems	0	0	0	1	0	0	1	0	0	0	1	0	0	0	1	0	0	0	0	0	0	0	0	0	0	0	0	0	0	0	0	0	0	0	0	1
bishaw2003	C.A. Bishaw, B. DeBell and D.S. Harrington	2003	Patterns of survival, damage and grwoth for western white pine in a 16 year old spacing trial in western Washington	Western Journal of Applied Forestry	0	0	0	1	0	0	1	0	0	0	0	1	0	0	0	0	0	0	0	0	0	0	0	0	0	0	1	0	0	0	0	0	0	0	0	1
bisher1995	J. Bishir and J. Roberds	1995	Analusos of failure time in clonally propagated plant populations	Mathematical Biosciences	0	0	0	1	0	0	0	0	0	0	1	0	0	0	0	0	0	0	0	0	1	0	0	0	0	0	0	0	0	0	0	0	0	0	0	1
bisher1997	J. Bishir and J. Roberds	1997	Limit theorems and a general framework for risk analysis in clonal forestry	Mathematical Biosciences	0	0	0	1	0	0	0	0	0	0	1	0	0	0	0	0	0	0	0	0	1	0	0	0	0	0	0	0	0	0	0	0	0	0	0	1
blodgett1997	J. T. Blodgett, E. L. Kruger and G. R. Stanosz	1997	Sphaeropsis sapinea and water stress in a red pine plantation in central Wisconsin	Phytopathology	0	0	0	1	0	0	1	0	0	0	0	1	0	0	0	0	0	0	0	0	0	0	0	0	1	0	0	0	0	0	0	1	0	0	0	1
boyd2013	I.L. Boyd, P.H. Freer-Smith, C.A. Gilligan, and H.C.J Godfray	2013	The consequence of tree pests and diseases for ecosystem services	Science	0	0	0	1	1	1	1	1	1	1	0	0	0	0	0	0	0	0	0	0	0	0	0	0	0	0	0	0	0	0	0	0	0	1	0	1
burdon1992	J.J. Burden, A. Wennstrom, L. Ericson, W.J. Muller and R. Morton	1992	Density-dependent mortality in pinus sylvestris caused by the snow blight pathogen Phacidium infestans	Oecologia	0	0	0	0	0	0	1	0	0	0	0	1	0	0	0	0	0	0	0	0	0	0	0	0	0	0	1	0	0	0	0	0	0	0	0	1
campbell2000	E.M. Campbell and J. A. Antos	2000	Distribution and severity of white pine blister rust and mountain pine beetle on whitebark pine in British Columbia	Canadian Journal of Forest Research-Revue Canadienne De Recherche Forestiere	0	0	0	1	0	0	1	0	0	0	1	0	0	0	0	0	0	1	0	0	0	0	0	0	0	0	0	1	0	0	0	0	0	0	0	1
chang1996	T. T. Chang	1996	Survival of Phellinus noxius in soil and in the roots of dead host plants	Phytopathology	0	0	0	1	0	0	1	0	0	0	1	0	0	0	0	0	0	0	0	0	0	0	0	1	0	0	0	0	0	0	0	0	0	0	0	1
chou1988	C.K.S. Chou and M. MacKenzie.	1988	Effect of pruning intensity and season on Diplodia pinea infection of Pinus radiata stem through pruning wounds	Forest Pathology	0	0	0	1	0	0	1	0	0	0	1	0	0	0	0	0	0	0	0	0	0	0	0	1	0	0	1	0	0	0	0	0	0	0	0	1
cleary2013	M. R. Cleary, N. Arhipova, D. J. Morrison, I. M. Thomsen, R. N. Sturrock, R. Vasaitis, T. Gaitnieks and J. Stenlid	2013	Stump removal to control root disease in Canada and Scandinavia: A synthesis of results from long-term trials	Forest Ecology and Management	0	0	0	1	0	0	1	0	0	0	1	0	0	0	0	0	0	0	0	0	0	0	0	1	0	0	0	0	0	0	0	0	0	0	0	1
condeso2007	T.E. Condeso and R.K. Meetenmeyer	2007	Effects of landscape heterogenity on the emerging forest disease sudden oak death in California	Forest Ecology and Management	0	0	0	1	0	0	0	1	0	0	0	1	0	0	0	0	0	1	0	0	0	0	0	0	0	0	0	0	1	0	0	0	0	0	0	1
cram2010	M.M. Cram, K. Shea and K. Forbus	2010	Case study to examine the effects of a growing season burn and annosum root disease on mortality in a longleaf pine stand	Proceedings of the 14th Biennial Southern Silvicultureal Research Conference	0	0	0	1	0	0	1	0	0	0	0	1	0	0	0	0	0	0	0	0	0	0	0	0	0	1	0	0	0	0	1	0	0	0	0	1
crone2014	M. Crone, J. A. McComb, P. A. O'Brien and G. E. S. Hardy	2014	Host removal as a potential control method for Phytophthora cinnamomi on severely impacted black gravel sites in the jarrah forest	Forest Pathology	0	0	0	1	0	0	0	1	0	0	1	0	0	0	0	0	0	0	1	0	0	0	0	0	1	0	0	0	0	0	0	0	0	0	0	1
cunniffe2016	N. J. Cunniffe, R. C. Cobb, R. K. Meentemeyer, D. M. Rizzo and C. A. Gilligan	2016	Modeling when, where, and how to manage a forest epidemic, motivated by sudden oak death in California	Proceedings of the National Academy of Sciences of the United States of America	0	0	0	1	0	0	0	1	0	0	0	0	0	1	0	0	0	0	0	1	0	0	0	1	0	0	0	0	0	0	0	0	0	0	0	1
cushmann2008	J. H. Cushman and R. K. Meentemeyer	2008	Multi-scale patterns of human activity and the incidence of an exotic forest pathogen	Journal of Ecology	0	0	0	1	0	0	0	1	0	0	0	0	0	1	0	0	0	0	0	0	0	0	0	0	0	0	0	1	0	0	0	0	0	0	0	1
davidson2011	J. M. Davidson, H. A. Patterson, A. C. Wickland, E. J. Fichtner and D. M. Rizzo	2011	Forest Type Influences Transmission of Phytophthora ramorum in California Oak Woodlands	Phytopathology	0	0	0	1	0	0	0	1	0	0	0	0	0	1	0	0	0	0	0	1	1	0	0	0	0	0	0	0	0	0	0	0	0	0	0	1
denitto1996	G.A. DeNitto	1996	Sivilcultural methods of limiting blister rust in sugar pine	Sugar pine: Status, Values, and Roles in Ecosystem	0	1	0	1	0	0	1	0	0	0																										1
dillon2014	W. W. Dillon, S. E. Haas, D. M. Rizzo and R. K. Meentemeyer	2014	Perspectives of spatial scale in a wildland forest epidemic	European Journal of Plant Pathology	0	0	0	1	0	0	0	1	0	0	1	0	0	0	0	0	0	0	0	0	0	0	0	0	0	0	1	0	1	0	0	0	0	0	0	1
dsouza2004	N. K. D'Souza, I. J. Colquhoun, B. L. Shearer and G. E. S. Hardy	2004	The potential of five Western Australian native Acacia species for biological control of Phytophthora cinnamomi	Australian Journal of Botany	0	0	0	1	0	0	0	1	0	0	1	0	0	0	0	0	0	0	0	0	1	0	0	0	0	0	0	0	0	0	0	0	0	0	0	1
dwyer2007	J. P. Dwyer, J. M. Kabrick and J. Wetteroff	2007	Do improvement harvests mitigate oak decline in Missouri Ozark forests?	Northern Journal of Applied Forestry	0	0	0	1	1	0	1	0	0	0	1	0	0	0	0	0	0	0	0	0	0	0	0	1	0	0	0	0	0	0	0	0	0	0	0	1
ellis2010	A. M. Ellis, T. Vaclavik and R. K. Meentemeyer	2010	When is connectivity important? A case study of the spatial pattern of sudden oak death	Oikos	0	0	0	1	1	0	1	0	0	0	0	0	0	1	0	0	0	0	0	0	0	1	1	0	0	0	0	0	0	0	0	0	0	0	0	1
entry1991	J.A. Entry, K. Cromack, R.G. Kelsey and N.E. Matin	1991	Response of douglas fir to infection by Armillaria ostoyae after thinning or thinning plus fertilisation	Phytopathology	0	0	0	1	0	0	1	0	0	0	0	1	0	0	0	0	0	0	0	0	0	0	0	0	0	0	1	0	0	0	0	0	1	0	0	1
felto2016	A. Felton, U. Nilsson, J. Sonesson, A. M. Felton, J. M. Roberge, T. Ranius, M. Ahlstrom, J. Bergh, C. Bjorkman, J. Boberg, L. Drossler, N. Fahlvik, P. Gong, E. Holmstrom, E. C. H. Keskitalo, M. J. Klapwijk, H. Laudon, T. Lundmark, M. Niklasson, A. Nordin, M. Pettersson, J. Stenlid, A. Stens and K. Wallertz	2016	Replacing monocultures with mixed-species stands: Ecosystem service implications of two production forest alternatives in Sweden	Ambio	0	0	0	1	1	1	1	1	1	1	1	1	0	0	0	0	0	0	0	0	1	0	0	0	0	0	0	0	0	0	0	0	0	0	0	1
ferchaw2013	V. A. L. Ferchaw, E. Goldsworthy, J. Pinkerton, D. I. Yun, U. J. Lund, W. Mark, S. Valkonen and D. D. Piirto	2013	Management strategies for pitch canker infected Ano Nuevo stands of Monterey pine	Forest Ecology and Management	0	0	0	1	0	0	0	0	0	1	0	1	0	0	0	0	0	0	0	0	1	1	0	0	0	0	1	0	0	0	1	0	0	0	0	1
fichtner2011	E. J. Fichtner, D. M. Rizzo, S. A. Kirk and J. F. Webber	2011	Root Infections May Challenge Management of Invasive Phytophthora spp. in UK Woodlands	Plant Disease	0	0	0	1	0	0	0	1	0	0	1	0	0	0	0	0	0	0	0	0	0	0	0	0	1	0	0	1	0	0	0	0	0	0	0	1
filip2010	G. M. Filip, H. M. Maffei, K. L. Chadwick and T. A. Max	2010	Armillaria Root Disease-Caused Tree Mortality following Silvicultural Treatments (Shelterwood or Group Selection) in an Oregon Mixed-Conifer Forest: Insights from a 10-Year Case Study	Western Journal of Applied Forestry	0	0	0	1	0	0	1	0	0	0	0	1	0	0	0	0	0	0	0	0	1	0	0	0	0	0	0	0	0	0	0	0	0	0	0	1
foster2006	D.R. Foster and D.A. Orwig	2006	Preemptive and Salvage Harvesting of New England Forests: When Doing Nothing Is a Viable Alternative	Conservation Biology	0	0	0	1	1	1	1	1	1	1	1	0	0	0	0	0	0	0	0	0	0	0	0	1	0	0	0	0	0	0	0	0	0	1	0	1
ganley2016	R. J. Ganley and L. S. Bulman	2016	Dutch elm disease in New Zealand: impacts from eradication and management programmes	Plant Pathology	0	0	0	1	0	0	1	0	0	0	0	0	0	1	0	0	0	0	0	0	0	0	0	1	0	0	0	0	0	0	0	0	1	0	0	1
garneau2012	D.E. Garneau, M.E. Lawler, A.S. Rumpf, E.S. Weyburne, T.M. Cuppernull, and A.G. Boe	2012	Potential effects of beech bark disease on small mammals and invertebrates in northeastern US forests	Northeastern Naturalist	0	0	0	1	0	0	1	0	0	0	0	0	0	0	0	0	0	0	0	0	0	0	0	0	0	0	0	0	0	0	0	0	0	1	0	1
geils2010	B.W. Geils, K.E. Hummer, and R.S. Hunt	2010	White pines, Ribes, and blister rust: a review and synthesis	Forest Pathology	0	1	0																																	1
gerlach1997	J. P. Gerlach, P. B. Reich, K. Puettmann and T. Baker	1997	Species, diversity, and density affect tree seedling mortality from Armillaria root rot	Canadian Journal of Forest Research-Revue Canadienne De Recherche Forestiere-Revue Canadienne De Recherche Forestiere	0	0	0	1	0	0	1	0	0	0	1	0	0	0	0	0	0	0	0	0	1	0	0	0	0	0	1	0	0	0	0	0	0	0	0	1
gherlardini2017	L. Ghelardini, N. Luchi, F. Pecori, A.L. Pepori, R. Danti, G. Rocca, P. Capretti, P. Tsopelas and A. Santini	2017	Ecology of invasive forest pathogens	Biological Invasions	0	1	0																																	1
gibbs2002	J.N. Gibbs, B.J.W. Greig, and J.E. Pratt	2002	Fromes root rot in Thetford forest, East Anglia: past, present, and future	Forestry	0	0	0	1	0	0	1	0	0	0	1	0	0	0	0	0	0	0	0	0	0	0	0	1	0	0	0	0	0	0	0	0	0	0	0	1
goheen2012	D. J. Goheen, K. Mallams, F. Betlejewski and E. Hansen	2012	Effectiveness of Vehicle Washing and Roadside Sanitation in Decreasing Spread Potential of Port-Orford-Cedar Root Disease	Western Journal of Applied Forestry	0	0	0	1	0	0	0	1	0	0	0	0	0	1	0	0	0	0	0	0	0	0	0	0	0	0	0	1	0	0	0	0	0	0	0	1
greene2008	T. A. Greene, C. M. Reemts and D. N. Appel	2008	Efficacy of Basal Girdling to Control Oak Wilt Fungal Mat Production in Texas Red Oak (Quercus buckleyi) in Central Texas	Southern Journal of Applied Forestry	0	0	0	1	0	0	1	0	0	0	1	0	0	0	1	0	0	0	0	0	0	0	0	0	0	0	0	0	0	0	0	0	0	0	0	1
haas2011	S.E. Haas, M.B. Hooten, D.M. Rizzo and R.K. Meentemeyer	2011	Forest species diversity reduces disease risk in a generalist plant pathogen invasion	Ecology letters	0	0	0	0	0	0	0	1	0	0	0	1	0	0	0	0	0	0	0	0	1	0	0	0	0	0	0	0	0	0	0	0	0	0	0	1
haas2016	S. E. Haas, J. H. Cushman, W. W. Dillon, N. E. Rank, D. M. Rizzo and R. K. Meentemeyer	2016	Effects of individual, community, and landscape drivers on the dynamics of a wildland forest epidemic	Ecology	0	0	0	1	0	0	0	1	0	0	1	0	0	0	0	0	1	0	0	1	1	0	0	0	0	0	0	0	0	0	0	0	0	0	0	1
hagle1988	S.K. Hagle and J.L. Grasham	1988	Biological and economic feasibility of pruning and excising white pines for blister rust control	USDA Forest Service Norther Region Pest Management Reoprt	0	0	0	1	0	0	1	0	0	0	0	1	0	0	0	0	0	0	0	0	0	0	0	1	0	0	0	0	0	0	0	0	0	0	0	1
haight2011	R.G. Haight, F.R. Homans, T. Horie, S.V. Mehta, D.J. Smith and R.C. Venette	2011	Assessing the cost of an invasive forest pathogen: A case study with oak wilt	Environmental Management	0	0	1	1	0	0	1	0	0	0	0	0	0	1	0	0	0	0	0	0	0	0	0	1	0	0	0	0	0	0	0	0	0	0	0	1
hantsch2013	L. Hantsch, U. Braun, M. Scherer-Lorenzen and H. Bruelheide	2013	Species richness and species identity effects on occurrence of foliar fungal pathogens in a tree diversity experiment	Ecosphere	0	0	0	1	0	0	1	0	0	0	0	1	0	0	0	0	0	0	0	0	1	0	0	0	0	0	0	0	0	0	0	0	0	0	0	1
hantsch2014	L. Hantsch, U. Braun, J. Haase, O. Purschke, M. Scherer-Lorenzen and H. Bruelheide	2014	No plant functional diversity effects on foliar fungal pathogens in experimental tree communities	Fungal Diversity	0	0	0	1	0	0	1	0	0	0	0	1	0	0	0	0	0	0	0	0	1	0	0	0	0	0	0	0	0	0	0	0	0	0	0	1
hantsch2014	L. Hantsch, S. Bien, S. Radatz, U. Braun, H. Auge and H. Bruelheide	2014	Tree diversity and the role of non-host neighbour tree species in reducing fungal pathogen infestation	Journal of Ecology	0	0	0	1	0	0	1	0	0	0	1	0	0	0	0	0	0	0	0	0	1	0	0	0	0	0	0	0	0	0	0	0	0	0	0	1
harrington2983	T.C. Harrington, C. Reinhart, D.A. Thornburgh and F.W. Cobb Jr	1983	Association of black-stain root disease with precommercial thinning of Douglas-fir	Forest Sceince	0	0	0	1	0	0	1	0	0	0	1	0	0	0	0	0	0	0	0	0	0	0	0	0	0	0	1	0	0	0	0	0	0	0	0	1
havrdova2017	L. Havrcova, D. Zahradnik, D. Romportl, V. Peskova, and K. Cerny	2017	Environmental and silvicultural characteristics influencing the extent of ash dieback in forest stands	Baltic Forestry	0	0	0	1	0	0	1	0	0	0	1	0	0	0	0	0	0	0	0	1	1	0	0	0	0	0	1	0	1	0	0	0	0	0	0	1
helender2006	M. Helander, P. Wali, T. Kuuluvainen and K. Saikkonen	2006	Birch leaf endophytes in managed and natural boreal forests	Canadian Journal of Forest Research-Revue Canadienne De Recherche Forestiere-Revue Canadienne De Recherche Forestiere	0	0	0	1	0	0	1	0	0	0	1	0	0	0	0	0	0	0	0	0	0	0	0	0	0	0	1	0	0	0	0	0	0	0	0	1
hessberg2001	P.F. Hessberg, D.J. Ghoeen and H. Koester	2001	Association of black stain root disease with roads, skid trails, and precommercial thiining in Southwset Orgeon	Western Journal of Applied Forestry	0	0	0	1	0	0	1	0	0	0	1	0	0	0	1	0	0	0	0	0	0	0	0	1	0	0	1	0	0	0	0	0	0	0	0	1
heybroek1982	H.M. Heybroek	1982	Monoculture versus mixture: interactions between susceptoble and resistant trees in a mixed stand	Proceeding of the Third International Workshop on the Genetics of Host-Parasite interactions in Forestry	0	1	0	1	0						0	1	0	0	0	0	0	0	0	0	1	0	0	0	0	0	0	0	0	0	0	0	0	0	0	1
holdenreider2004	O. Holdenrieder, M. Pautasso, P. J. Weisberg and D. Lonsdale	2004	Tree diseases and landscape processes: the challenge of landscape pathology	Trends in Ecology & Evolution	0	1	0	1	0	0	1	0	0	0	1	0	0	0	0	0	0	0	0	1	0	1	0	0	0	0	0	0	1	0	0	0	0	0	0	1
holzmueller2006	E. Holzmueller, S. Jose, M. Jenkins, A. Camp and A. Long	2006	Dogwood anthracnose in eastern hardwood forests: What is known and what can be done?	Journal of Forestry	0	1	0	1	0	0	1	0	0	0	1	0	0	0	0	0	1	0	0	0	0	0	0	0	0	0	1	0	0	0	1	0	0	0	0	1
holzmuller2008	E. J. Holzmueller, S. Jose and M. A. Jenkins	2008	The relationship between fire history and an exotic fungal disease in a deciduous forest	Oecologia	0	0	0	1	0	0	1	0	0	0	1	0	0	0	0	0	0	0	0	0	0	0	0	0	0	0	1	0	0	0	1	0	0	0	0	1
hood2002	I.A. Hood, M.O. Kimberley, J.F. Gardner and C.J. Sandberg	2002	Armillaria root disease of Pinus radiata in New Zealand. 3: Influence of thinning and pruning	New Zealand Journal of Forestry Science	0	0	0	1	0	0	1	0	0	0	1	0	0	0	0	0	0	0	0	0	0	0	0	0	0	0	1	0	0	0	0	0	0	0	0	1
hood2009	I. A. Hood, J. F. Gardner, R. J. Hood, B. M. Smith and G. D. Phillips	2009	Pruning and cypress canker in New Zealand	Australasian Plant Pathology	0	0	0	1	0	0	1	0	0	0	1	0	0	0	1	0	0	0	0	0	0	0	0	0	0	0	0	0	0	0	0	0	0	0	0	1
hood2009a	I. A. Hood and M. O. Kimberley	2009	Impact of armillaria root disease and the effect of thinning in a late-rotation Pinus radiata plantation	Forest Pathology	0	0	0	1	0	0	1	0	0	0	1	0	0	0	1	0	0	0	0	0	0	0	0	0	0	1	1	0	0	0	0	0	0	0	0	1
hungerford1982	R.D. Hungerford	1982	Thinning and pruning western white pine: a potential for reducing mortality due to blister rust	Thinning and pruning western white pine: a potential for reducing mortality due to blister rust	0	0	0	1	0	0	1	0	0	0	1	0	0	0	0	0	0	0	0	0	0	0	0	1	0	0	1	0	0	0	0	0	0	0	0	1
hungerford82	R.D. Hungerford, R.E. Williams, and M.A. Marsden	1982	Thinning and pruning western white pine: a potential for reducing mortality due to blister rust	US Dept. of Agriculture, Forest Service, Intermountain Forest and Range Experiment Station	0	0	0	1	0	0	1	0	0	0	0	1	0	0	0	0	0	0	0	0	0	0	0	1	0	0	1	0	0	0	0	0	0	0	0	1
hunt2002	R.S. Hunt	2002	Can solid deer protectors prevent blister rust from attacking white pines?	Forest Pathology	0	0	0	1	0	0	1	0	0	0	0	1	0	0	0	0	0	0	0	0	0	1	0	0	0	0	0	0	0	0	0	0	0	0	0	1
hunt2010	R. S. Hunt, B. W. Geils and K. E. Hummer	2010	White pines, Ribes, and blister rust: integration and action	Forest Pathology	0	1	0	1	0	0	1	0	0	0	1	1	0	0	1	0	0	0	0	1	1	0	0	1	0	0	1	0	0	0	0	0	1	0	0	1
jactel2009	H. Jactel, B. C. Nicoll, M. Branco, J. R. Gonzalez-Olabarria, W. Grodzki, B. Langstrom, F. Moreira, S. Netherer, C. Orazio, D. Piou, H. Santos, M. J. Schelhaas, K. Tojic and F. Vodde	2009	The influences of forest stand management on biotic and abiotic risks of damage	Annals of Forest Science	0	1	0	1	1	0	1	0	0	0	1	0	0	0	1	0	0	0	1	1	1	0	0	1	0	0	1	0	0	0	0	0	0	0	0	1
jactel2017	H. Jactel, J. Bauhus, J. Boberg, D. Bonal, B. Castagneyrol, B. Gardiner, J.R. Gonzalez-Olabarria, J. Koricheva, N. Meurisse and E.G Brockerhoff	2017	Tree diversity drives forest stand resistance to natural distrubances	Forest Entomology	0	1	0	1	1	1	1	1	1	1	0	1	0	0	0	0	0	0	0	0	0	0	0	0	0	0	0	0	0	0	0	0	0	0	0	1
jules2002	E.S. Jules, M.J. Kauffman, W.D. Ritts and A.L. Carroll	2002	Spread of an invasive pathogen over a variable landscape: a nonnative root rot on Port Orford cedar	Ecology	0	0	0	1	0	0	0	1	0	0	0	0	0	1	0	0	0	0	0	0	0	0	1	0	0	0	0	0	0	0	0	0	0	0	0	1
kaitera2002	J. Kaitera	2002	Short-term effect of thinning on Pinus sylvestris damage and sporulation caused by cronartium flaccidum	Scandinavian Journal of Forest Research	0	0	0	1	0	0	1	0	0	0	0	1	0	0	0	0	0	0	0	0	0	0	0	0	0	0	1	0	0	0	0	0	0	0	0	1
kamp1994	B. J. Vanderkamp	1994	Lodegpole pine stem diseases and management of stand density in the British Coloumbia interior	Forestry Chronicle	0	0	0	1	0	0	1	0	0	0	0	1	0	0	0	0	0	0	0	0	1	0	0	0	0	0	1	0	0	0	0	0	0	0	0	1
kanaskie2006	A. Kanaskie, N. Osterbauer, M. McWilliams, E. Goheen, E. Hansen, and W. Sutton	2006	Eradication of Phythophthora ramorum in Oregon forest - Status after 3 years	Proceeding of the Sudden Oak Death Second Science Symposium: The State of Our Knowledge	0	0	0	1	0	0	0	1	0	0	0	1	0	0	0	0	0	0	0	0	0	0	0	1	0	0	0	0	0	0	1	0	0	0	0	1
katovich2004	S.A. Katovich, J.G. O'Brien, M.E. Mielke, and M.E. Ostry	2004	Restoration and Management of Eastern White Pine within high blister rust hazard zones in the lake states	USDA Forest Service Proceedings	0	0	0	1	0	0	1	0	0	0	0	1	0	0																						1
koch2010	K. A. Koch, G. L. Quiram and R. C. Venette	2010	A review of oak wilt management: A summary of treatment options and their efficacy	Urban Forestry & Urban Greening	0	0	0	1	0	0	1	0	0	0	1	0	1	0	0	0	0	0	0	0	0	0	0	1	0	0	0	0	0	1	0	0	1	0	0	1
koricheva2005	J. Koricheva, H. Vehvilainen, J. Riihimaki, K. Ruohomaki, P. Kaitaniemi, and H. Ranta	2005	Diversification of tree stands as a means to manage pests and diseases in boreal forests: myth or reality?	Canadian Journal of Forest Research-Revue Canadienne De Recherche Forestiere	0	1	0	1	1	1	1	1	1	1	0	1	0	0	0	0	0	0	0	0	1	0	0	0	0	0	0	0	0	0	0	0	0	0	0	1
kwon2011	T. S. Kwon, J. H. Shin, J. H. Lim, Y. K. Kim and E. J. Lee	2011	Management of pine wilt disease in Korea through preventative silvicultural control	Forest Ecology and Management	0	0	0	1	0	0	1	0	0	0	1	0	0	0	0	0	0	0	0	0	0	0	0	1	0	0	0	0	0	0	0	0	0	0	0	1
lavallee1991	A. Lavallee	1991	White pine blister rust control in a 5 year old eastern white pine plantation at Vercheres, Quebec	Rusts of Pine. Proceeding of the IUFRO Rusts of Pine Working Party Conference	0	0	0	1	0	0	1	0	0	0	0	1	0	0	0	0	0	0	0	0	0	0	0	1	0	0	0	0	0	0	0	0	0	0	0	1
leak2006	W. B. Leak	2006	Fifty-year impacts of the beech bark disease in the Bartlett Experimental Forest, New Hampshire	Northern Journal of Applied Forestry	0	0	0	1	1	0	1	0	0	0	0	1	0	0	0	0	0	0	0	0	0	0	0	1	0	0	0	0	0	0	0	0	0	0	1	1
libby1982	W.J. Libby	1982	What is a safe number of clones per plantation	Resistance to diseases and pests in forest trees	0	0	1	1	0	0	0	0	0	0	1	0	0	0	0	0	0	0	0	0	1	0	0	0	0	0	0	0	0	0	0	0	0	0	0	1
liebhold2017	A.M. Liebhold, E.G. Brockerhoff, S. Kalisz, M.A. Nuñez, D.A. Wardle and M.J. Wingfield	2017	Biological invasions in forest ecosystems	Biological Invasions	0	1	0	1	1	1	1	1	1	1	0	1	0	0	0	0	0	0	0	0	0	0	0	0	0	0	0	0	0	0	0	0	0	0	0	1
linden2002	M. Linden and G. Vollbrecht	2002	Sensitivity of Picea abies to Butt Rot in Pure Stands and Mixed Stands with Pinus sylvestris in Southern Sweden	Silva Fennica	0	0	0	1	0	0	1	0	0	0	0	1	0	0	0	0	0	0	0	0	1	0	0	0	0	0	0	0	0	0	0	0	0	0	0	1
loustau1997	M. L. DesprezLoustau and K. Wagner	1997	Influence of silvicultural practices on twisting rust infection and damage in maritime pine, as related to growth	Forest Ecology and Management	0	0	0	1	0	0	1	0	0	0	1	1	0	0	0	1	0	0	0	0	0	0	0	0	0	0	1	0	0	0	0	0	1	0	0	1
madar1991	Z. Madar, Z. Solel, A. Sztejnberg and M. Kimchi	1991	Effect of pruning of trunk side branches of cypress on infection by seiridium-cardinale and diplodia-pinea S-SP cupressi	Forest Ecology and Management	0	0	0	1	0	0	1	0	0	0	0	0	1	0	0	0	0	0	0	0	0	0	0	1	0	0	0	0	0	0	0	0	0	0	0	1
martin2005	J. Martin, J. Cabezas, T. Buyolo and D. Paton	2005	The relationship between Cerambyx spp. damage and subsequent Biscogniauxia mediterranum infection on Quercus suber forests	Forest Ecology and Management	0	0	0	1	1	0	1	0	0	0	1	0	0	0	1	0	0	0	0	0	0	0	0	0	0	0	0	0	0	0	0	0	0	0	0	1
matilla2001	U. Mattila, R. Jalkanen and A. Nikula	2001	The effects of forest structure and site characteristics on probability of pine twisting rust damage in young Scots pine stands	Forest Ecology and Management	0	0	0	1	0	0	1	0	0	0	1	0	0	0	0	0	0	0	0	0	1	0	0	0	0	0	0	0	0	0	0	0	0	0	0	1
matilla2002	U. Mattila	2002	The risk of pine twisting rust damage in young Scots pines: a multilevel logit model approach	Forest Ecology and Management	0	0	0	1	0	0	1	0	0	0	1	0	0	0	0	0	0	0	0	0	1	0	0	0	0	0	0	0	0	0	0	0	0	0	0	1
mccracken1997	A.R. McCracken and W.M. Dawson	1997	Growing clonal mixture of willow to reduce effect of Melampsora epitea var. epitea	European Journal of Forest Pathology	0	0	0	1	0	0	1	0	0	0	0	1	0	0	0	0	0	0	0	0	1	0	0	0	0	0	0	0	0	0	0	0	0	0	0	1
mccracken2001	A.R. McCracken, W.M. Dawson and G. Bowden	2001	Yeild responses of willow (Salix) grown in mixtures in short rotation coppice (SRC)	Biomass and Bioenergy	0	0	0	1	0	0	1	0	0	0	0	0	1	0	0	0	0	0	0	0	1	0	0	0	0	0	0	0	0	0	0	0	0	0	0	1
mccracken1998	A.R. McCracken and W.M. Dawson	1998	Short rotation coppice willow in Northern Ireland since 1973: development of the use of mixtures in the control of foliar rust	European Journal of Forest Pathology	0	0	0	1	0	0	1	0	0	0	0	1	0	0	0	0	0	0	0	0	1	0	0	0	0	0	1	0	0	0	0	0	0	0	0	1
meadows2013	J.S. Meadows, T.D. Leininger, D. Montwe, and T.E. Nebeker	2013	Thinning to improve growth, bole quality, and forest health in an Innotus hispidus infected red oak sweetgum stands in the Mississippi delta: 10 years results	USDA	0	0	0	1	0	0	1	0	0	0	0	1	0	0	0	0	0	0	0	0	0	0	0	0	0	0	1	0	0	0	0	0	0	0	0	1
meentenmeyer2008	R. K. Meentemeyer, N. E. Rank, B. L. Anacker, D. M. Rizzo and J. H. Cushman	2008	Influence of land-cover change on the spread of an invasive forest pathogen	Ecological Applications	0	0	0	1	0	0	0	1	0	0	0	0	0	1	0	0	0	0	0	0	1	0	0	0	0	0	0	0	1	0	0	0	0	0	0	1
menkis2016	A. Menkis, I. L. Ostbrant, K. Wagstrom and R. Vasaitis	2016	Dutch elm disease on the island of Gotland: monitoring disease vector and combat measures	Scandinavian Journal of Forest Research	0	0	0	1	0	0	1	0	0	0	1	0	0	0	0	0	0	0	0	0	0	0	0	1	0	0	0	0	0	0	0	0	0	0	0	1
metzler1997	B. Metzler	1997	Quantitative assessment of fungal colonisation in Norway Spruce after green pruning	European Journal of Forest Pathology	0	0	0	1	0	0	1	0	0	0	1	0	0	0	0	0	0	0	0	0	0	0	0	1	0	0	0	0	0	0	0	0	0	0	0	1
mitchell2014	R. J. Mitchell, J. K. Beaton, P. E. Bellamy, A. Broome, J. Chetcuti, S. Eaton, C. J. Ellis, A. Gimona, R. Harmer, A. J. Hester, R. L. Hewison, N. G. Hodgetts, G. R. Iason, G. Kerr, N. A. Littlewood, S. Newey, J. M. Potts, G. Pozsgai, D. Ray, D. A. Sim, J. A. Stockan, A. F. S. Taylor and S. Woodward	2014	Ash dieback in the UK: A review of the ecological and conservation implications and potential management options	Biological Conservation	0	0	0	1	0	0	1	0	0	0	0	0	1	0	0	0	0	0	0	0	0	0	0	0	0	0	0	0	0	0	0	0	0	1	0	1
montagnini2011	F. Montagnini and D. Piotto	2011	Mixed Plantations of Native Trees on Abandoned Pastures: Restoring Productivity, Ecosystem Properties, and Services on a Humid Tropical Site	Silviculture in the Tropics	0	0	0	1	0	0	0	0	0	0	1	0	0	0	0	0	0	0	0	0	1	0	0	0	0	0	0	0	0	0	0	0	0	0	0	1
morrison1988	D.J. Morrison, G.M. Wallis and L.C. Weir	1988	Control of Armillaria and Phellinus root diseases: 20 year results from the Skimikin stump removal experiment	Canadian Forest Services	0	0	0	1	0	0	1	0	0	0	1	0	0	0	0	0	0	0	0	0	0	0	0	1	0	0	0	0	0	0	0	0	0	0	0	1
morrison2001	D.J. Morrison, K.W. Pellow, A.F. Nemec, D.J. Norris and P. Semenoff	2001	Effects of selective cutting on the epidemiology of Armillaria root disease in the Southern interior of British Colombia	Canadian Journal of Forest Research-Revue Canadienne De Recherche Forestiere	0	0	0	1	0	0	1	0	0	0	0	1	0	0	0	0	0	0	0	0	0	0	0	0	0	0	1	0	0	0	0	0	0	0	0	1
morrison2014	D. J. Morrison, M. G. Cruickshank and A. Lalumiere	2014	Control of laminated and Armillaria root diseases by stump removal and tree species mixtures: Amount and cause of mortality and impact on yield after 40 years	Forest Ecology and Management	0	0	0	1	0	0	1	0	0	0	0	1	0	0	0	0	0	0	0	0	1	0	0	0	0	0	0	0	0	1	0	0	0	0	0	1
muzica2017	R.M. Muzika	2017	Opportunities for silviculture in management and restoration of forests affected by invasive species	Biological Invasions	0	1	0	1	1	0	0	0	0	0																										1
nebeker1999	T.E. Nebeker, T.D. Leiniger, and J.S. Meadows	1999	Silvicultural practices in forest of the southern united states: insect and disease considerations	USDA, Presented at the Tenth Biennial Southern Silvicultural Research Conference, Shreveport	0	0	0	1	1	0	1	0	0	0																										1
nguyen2016	D. Nguyen, B. Castagneyrol, H. Bruelheide, F. Bussottim, V. Guyot, H. Jactel, B. Jaroszewicz, F. Valladares, J. Stenlid and J. Boberg	2016	Fungal disease incidence along tree diversity gradients depends on latitude in European forests	Ecology and Evolution	0	0	0	1	0	0	1	0	0	0	0	1	0	0	0	0	0	0	0	0	1	0	0	0	0	0	0	0	0	0	0	0	0	0	0	1
oliva2007	J. Oliva and C. Colinas	2007	Canopy openings may prevent fir broom rust (Melampsorella caryophyllacearum) infections	European Journal of Forest Research	0	0	0	1	0	0	1	0	0	0	1	0	0	0	0	0	0	1	0	1	0	0	0	0	0	0	1	0	0	0	0	0	0	0	0	1
oliva2009	J. Oliva, L. M. Suz and C. Colinas	2009	Ecology of Armillaria species on silver fir (Abies alba) in the Spanish Pyrenees	Annals of Forest Science	0	0	0	1	0	0	1	0	0	0	1	0	0	0	0	0	0	0	0	0	1	0	0	0	0	0	1	0	0	0	0	0	0	0	0	1
ostry2000	M.E. Ostry	2000	Restoration of white pine in Minnesota, Wisconsin, and Michigan	Horticultural Technology	0	0	0	1	0	0	1	0	0	0	0	1	0	0																						1
ostry2010	M.E. Ostry, G. Laflamme, and S.A. Katovich	2010	Silvicultural approaches for management of eastern white pine to minimise impacts of damaging agents	Forest Pathology	0	1	0	1	0	0	1	0	0	0																										1
ostry2012	M.E. Ostry, M.J. Moore, C.C. Kern, R.C. Venette and B.J. Palik	2012	Multiple disease impact survival of pine species planted in red pine stands harvested in spatially variable retention patterns	Forest Ecology and Management	0	0	0	1	0	0	1	0	0	0	0	1	0	0	0	0	0	0	0	0	0	0	0	1	0	0	0	0	0	0	0	0	0	0	0	1
otrosina2007	W.J. Otrosina, J.T. Kliejunas, S. Smith, D.R. Cluck, S.S. Sung and C.D. Cook	2007	Black stain root disease studies on Ponderosa Pine - Parameters and disturbance treatment affecting infection and mortality	Acta Silviculture	0	0	0	1	0	0	1	0	0	0	0	1	0	0																						1
pankuch2003	J. M. Pankuch, P. V. Blenis, V. J. Lieffers and K. I. Mallett	2003	Fungal colonization of aspen roots following mechanical site preparation	Canadian Journal of Forest Research-Revue Canadienne De Recherche Forestiere-Revue Canadienne De Recherche Forestiere	0	0	0	1	0	0	1	0	0	0	1	0	0	0	0	0	0	0	0	0	0	0	0	0	0	0	0	0	0	1	0	0	0	0	0	1
pautasso2005	M. Pautasso, O. Holdenrieder and J. Stenlid	2005	Susceptibility to fungal pathogens of forests differing in tree diversity	Forest Diversity and Function	0	1	0	1	0	0	1	0	0	0																										1
pautasso2013	M. Pautasso, G. Aas, V. Queloz and O. Holdenrieder	2013	European ash (Fraxinus excelsior) dieback - A conservation biology challenge	Biological Conservation	0	1	0	0	0	0	0	0	0	0	0	0	0	0	0	0	0	0	0	0	0	0	0	0	0	0	0	0	0	0	0	0	0	0	0	1
peacock2001	L. Peacock, T. Hunter, H. Turner and P. Brain	2001	Does host genotype diversity affect the distribution of insect and disease damage in willow cropping systems?	Journal of Applied Ecology	0	0	0	1	1	0	1	0	0	0	1	0	0	0	0	0	0	0	0	0	1	0	0	0	0	0	0	0	0	0	0	0	0	0	0	1
peterson2014	E. Peterson, E. Hansen and A. Kanaskie	2014	Spatial relationship between Phytophthora ramorum and roads or streams in Oregon tanoak forests	Forest Ecology and Management	0	0	0	1	0	0	0	1	0	0	0	0	0	1	0	0	0	0	0	0	0	0	1	0	0	0	0	0	0	0	0	0	0	0	0	1
piirto2005	D. D. Piirto and S. Valkonen	2005	Structure and development of pitch canker infected Monterey pine stands at Ano Nuevo, California	Forest Ecology and Management	0	0	0	1	0	0	1	0	0	0	1	1	0	0	0	0	0	0	0	1	1	0	0	0	0	0	0	0	0	0	0	0	0	0	0	1
pleysier2006	C. E. Pleysier, K. L. Bayliss, B. Dell and G. E. S. Hardy	2006	Temperature, humidity, wounding and leaf age influence the development of Alternaria alternata lesions on leaves of Paulownia fortunei	Australasian Plant Pathology	0	0	0	1	0	0	1	0	0	0	0	1	0	0	1	0	1	0	0	0	0	0	0	0	0	0	0	0	0	0	0	0	0	0	0	1
prospero2017	S. Prospero and M. Cleary	2017	Effects of Host Variability on the Spread of Invasive Forest Diseases	Forests	0	1	0	1	0	0	1	0	0	0	0	0	0	1	0	0	0	0	0	0	1	1	0	0	0	0	0	0	0	0	0	0	0	0	0	1
puddu2003	A. Puddu, N. Luisi, P. Capretti, and A. Santini	2003	Environmental factors related to damage by Heterobasidion abietinum in Abis alba forests in Southern Italy	Forest Ecology and Management	0	0	0	1	0	0	1	0	0	0	0	1	0	0	0	0	1	0	0	1	1	0	0	0	0	0	0	0	0	0	0	0	0	0	0	1
ramage2012	B. S. Ramage, A. B. Forrestel, M. A. Moritz and K. L. O'Hara	2012	Sudden oak death disease progression across two forest types and spatial scales	Journal of Vegetation Science	0	0	0	1	0	0	0	1	0	0	0	0	0	1	0	0	0	0	0	0	1	0	0	0	0	0	0	0	0	0	0	0	0	0	0	1
rhoades2003	C.C. Rhoades, S.L. Brosi, A.J. Dattilo and P. Vincelli	2003	Effect of soil compaction and moisture on incidence of phytophthora root rot on American chestnut (Castanea dentata) seedlings	Forest Ecology and Management	0	0	0	1	0	0	0	1	0	0	1	0	0	0	0	0	0	0	0	0	0	0	0	0	0	0	0	0	0	1	0	1	1	0	0	1
richter2011	B. S. Richter, D. M. Benson and K. L. Ivors	2011	Microbial Profiling of Cultural Systems for Suppression of Phytophthora Root Rot in Fraser Fir	Plant Disease	0	0	0	1	0	0	0	1	0	0	0	1	0	0	0	0	0	0	0	0	0	0	0	0	0	0	0	0	0	1	0	0	0	0	0	1
roach2015	W. J. Roach, S. W. Simard and D. L. Sachs	2015	Evidence against planting lodgepole pine monocultures in the cedar-hemlock forests of southeastern British Columbia	Forestry	0	0	0	1	0	0	1	0	0	0	1	0	0	0	1	0	0	0	0	0	0	0	0	0	0	0	1	0	0	0	1	0	0	0	0	1
robinson2003	R. M. Robinson	2003	Short-term impact of thinning and fertilizer application on Armillaria root disease in regrowth karri (Eucalyptus diversicolor F. Muell.) in Western Australia	Forest Ecology and Management	0	0	0	1	0	0	1	0	0	0	1	0	0	0	0	0	0	0	0	0	0	0	0	0	0	0	1	0	0	1	0	0	0	0	0	1
ronnberg2000	J. Ronnberg	2000	Logging operation damage to roots of clear-felled Picea obies and subsequent spore infection by Heterobasidion annosum	Silva Fennica	0	0	0	1	0	0	1	0	0	0	1	0	0	0	0	0	0	0	0	0	0	0	0	0	0	1	0	0	0	0	0	0	0	0	0	1
rosenvald2015	R. Rosenvald, R. Drenkhan, T. Riit and A. Lohmus	2015	Towards silvicultural mitigation of the European ash (Fraxinus excelsior) dieback: the importance of acclimated trees in retention forestry	Canadian Journal of Forest Research-Revue Canadienne De Recherche Forestiere	0	0	0	1	0	0	1	0	0	0	0	1	0	0	0	0	0	0	0	0	1	0	0	1	0	0	1	0	0	0	0	0	0	0	0	1
rosso1998	R. Rosso and E. Hansen	1998	Tree vigour and the susceptability of Douglas-fir to Armillaria root disease	European Journal of Forest Pathology	0	0	0	1	0	0	1	0	0	0	0	1	0	0	0	1	0	0	0	0	0	0	0	0	0	0	0	0	0	0	0	0	0	0	0	1
sakamoto2006	J.M. Sakamoto and T. R. Gordon.	2006	Factors influencing infection of mechanical wounds by Fusarium circinatum on Monterey pines (Pinus radiata)	Plant pathology	0	0	0	1	0	0	1	0	0	0	1	0	0	0	1	0	0	0	0	0	0	0	0	0	0	0	0	0	0	0	0	0	0	0	0	1
santini2003	A. Santini, A. Pepori, L. Ghelardini and P. Capretti	2008	Persistence of some pine pathogens in coarse woody debris and cones in a Pinus pinea forest	Forest Ecology and Management	0	0	0	1	0	0	1	0	0	0	1	0	0	0	0	0	0	0	0	0	0	0	0	1	0	0	0	0	0	0	0	0	0	0	0	1
schoettle2007	A. W. Schoettle and R. A. Sniezko	2007	Proactive intervention to sustain high-elevation pine ecosystems threatened by white pine blister rust	Journal of Forest Research	0	1	0	1	0	0	1	0	0	0	0	1	0	0	0	1	0	0	0	0	1	0	0	0	0	0	0	0	0	0	0	0	0	0	1	1
schwandt2010	J.W. Schwandt, I.B. Lockman, J.T. Kliejunas and J.A. Muir	2010	Current health issues and management strategies for white pines in the western United States and Canada	Forest Pathology	0	1	0	1	0	0	1	0	0	0																										1
shaw2012	C. G. Shaw, D. W. Omdal, A. Ramsey-Kroll and L. F. Roth	2012	Inoculum Reduction Measures to Manage Armillaria Root Disease in a Severely Infected Stand of Ponderosa Pine in South-Central Washington: 35-Year Results	Western Journal of Applied Forestry	0	0	0	1	0	0	1	0	0	0	1	0	0	0	0	0	0	0	0	0	0	0	0	1	0	0	0	0	0	0	0	0	0	0	0	1
simard2005	S.W. Simard, S.M. Hagerman, D.L. Sachs, J.L. Heineman and W.J. Mather	2005	Conifer growth, Armillaria ostyae root disease and plant diversity responses to broadleaf competition reduction in temperate mized forests of southern interior British Colombia	Canadian Journal of Forest Research-Revue Canadienne De Recherche Forestiere	0	0	0	1	0	0	1	0	0	0	1	0	0	0	0	0	0	0	0	0	1	0	0	0	0	0	0	0	0	0	0	0	0	0	0	1
simard2006	S. Simard and A. Vyse	2006	Trade-offs between competition and facilitation: a case study of vegetation management in the interior cedar-hemlock forests of southern British Columbia	Canadian Journal of Forest Research-Revue Canadienne De Recherche Forestiere-Revue Canadienne De Recherche Forestiere	0	1	0	1	0	0	1	0	0	1	1	0	0	0	0	0	0	0	0	0	1	0	0	0	0	0	0	0	0	0	0	0	0	0	0	1
staudhammer2009	C. L. Staudhammer, E. J. Jokela and T. A. Martin	2009	Competition dynamics in pure- versus mixed-family stands of loblolly and slash pine in the southeastern United States	Canadian Journal of Forest Research-Revue Canadienne De Recherche Forestiere-Revue Canadienne De Recherche Forestiere	0	0	0	1	0	0	1	0	0	0	1	0	0	0	0	0	0	0	0	1	1	0	0	0	0	0	0	0	0	0	0	0	0	0	0	1
storer2004	A.J. Storer, J.N. Rosemier, B.L. Beachy and D.J. Flaspohler	2004	Potential effects of beech bark disease and decline in beech abundance on birds and small mammals.	Beech Bark Disease	0	0	0	1	0	0	1	0	0	0	0	0	0	0	0	0	0	0	0	0	0	0	0	0	0	0	0	0	0	0	0	0	0	1	0	1
sturtevant2012	B. R. Sturtevant, E. J. Gustafson, W. Li and H. S. He	2004	Modeling biological disturbances in LANDIS: a module description and demonstration using spruce budworm	Ecological Modelling	0	0	1	1	1	0	0	0	0	0	0	0	0	0	0	0	0	0	0	0	0	0	0	0	0	0	0	0	0	0	0	0	0	1	0	1
swiecki2008	T.J. Swiecki and E.A. Bernhardt	2008	Increasing distance from California Bay Laurel Reduced the Risk and Severity of Phytophthora ramorum canker in coast live oak	Proceedings of the Sudden Oak Death Third Science Symposium	0	0	0	1	0	0	0	1	0	0	0	1	0	0	0	0	0	0	0	0	1	0	0	0	0	0	0	0	0	0	0	0	0	0	0	1
tarigan2011	M. Tarigan, M. J. Wingfield, M. van Wyk, B. Tjahjono and J. Roux	2011	Pruning quality affects infection of Acacia mangium and A. crassicarpa by Ceratocystis acaciivora and Lasiodiplodia theobromae	Southern Forests	0	0	0	1	0	0	1	0	0	0	0	1	0	0	1	0	0	0	0	0	0	0	0	0	0	0	0	0	0	0	0	0	0	0	0	1
thies2005	W. G. Thies and D. J. Westlind	2005	Stump removal and fertilization of five Phellinus weirii-infested stands in Washington and Oregon affect mortality and growth of planted Douglas-fir 25 years after treatment	Forest Ecology and Management	0	0	0	1	0	0	1	0	0	0	1	0	0	0	0	0	0	0	0	0	0	0	0	1	0	0	0	0	0	0	0	0	1	0	0	1
thor2005	M. Thor and J. Stenlid	2005	Heterobasidion annosum infection of Picea abies following manual or mechanised stump treatment	Scandinavian Journal of Forest Research	0	0	0	1	0	0	1	0	0	0	0	1	0	0	0	0	0	0	0	0	0	0	0	0	0	1	0	0	0	0	0	0	0	0	0	1
urbina2008	E. O. de Urbina, N. Mesanza, A. Aragones, R. Raposo, M. Elvira-Recuenco, R. Boque, C. Patten, J. Aitken and E. Iturritxa	2017	Emerging Needle Blight Diseases in Atlantic Pinus Ecosystems of Spain	Forests	0	0	0	1	0	0	1	0	0	0	1	0	0	0	0	0	0	0	0	1	0	0	0	1	0	0	1	0	0	0	0	0	0	0	0	1
valachovic2010	Y. Valachovic, C. Lee, J. Marshall and H. Scanlon	2010	Forest Treatment Strategies for Phytophthora ramorum	Proceedings of the Sudden Oak Death Fourth Science Symposium	0	1	0	1	0	0	0	1	0	0	1	1	1	1	0	0	0	0	1	0	0	0	0	1	0	0	1	0	0	0	0	0	0	0	0	1
valachovic2013	Y. Valachovic, C. Lee, B. Twieg, D. Rizzo, R. Cobb and R. Glebocki	2013	Suppression of Phytophthora ramorum infectations through silvicultural treatment in Californias North Coast	Proceedings of the Sudden Oak Death Fifth Science Symposium	0	0	0	1	0	0	0	1	0	0	0	1	0	0	0	0	0	0	0	0	0	0	0	1	0	0	0	0	0	0	0	0	0	0	0	1
valachovic2013a	Y. Valachovic, R. Cobb, D. Rizzo, B. Twieg, C. Less and R. Glebocki	2013	Is stump sprout treatment necessary to effectively control phythophthora ramorum in California's wildlands?	Proceedings of the Sudden Oak Death Fifth Science Symposium	0	0	0	1	0	0	0	1	0	0	0	1	0	0	0	0	0	0	0	0	0	0	0	0	0	1	0	0	0	0	0	0	0	0	0	1
ward2010	J. S. Ward, S. Anagnostakis and F. J. Ferrandino	2010	Nectria Canker Incidence on Birch (Betula spp.) in Connecticut	Northern Journal of Applied Forestry	0	0	0	1	0	0	1	0	0	0	1	0	0	0	0	0	0	1	0	0	1	0	0	1	0	0	0	0	0	0	0	0	0	0	0	1
waring2005	K. M. Waring and K. L. O'Hara	2005	Silvicultural strategies in forest ecosystems affected by introduced pests	Forest Ecology and Management	0	1	0	1	1	0	0	0	0	0	1	1	1	1	0	1	0	0	0	1	1	1	0	1	0	0	0	0	0	0	0	0	0	0	0	1
whitney2005	R. D. Whitney and R. N. Irwin	2005	Comparison of Armillaria root disease on burned and unburned, harvested sites in Ontario	Forestry Chronicle	0	0	0	1	0	0	1	0	0	0	1	0	0	0	0	0	0	0	0	0	0	0	0	0	0	0	0	0	0	0	1	0	0	0	0	1
wingfield1994	M. J. Wingfield and W. J. Swart	1994	Integrate management of forest tree diseases in South Africa	Forest Ecology and Management	0	0	0	1	1	0	1	0	0	0	1	0	0	0	0	0	0	0	0	0	0	0	0	1	0	0	0	0	0	0	0	0	1	0	0	1
wingfield2017	M.J. Wingfield, B. Slippers, B.D. Wingfield and I. Barnes	2017	The unified framework for biological invasions: a forest pathogen perspective	Biological Invasions	0	1	0	1	0	0	1	0	0	0																										1
zeglen2010	S. Zeglen, J. Pronos and H. Merler	2010	Silvicultural management of white pines in western North America	Forest Pathology	0	1	0	1	0	0	1	0	0	0	1	0	0	0	0	0	0	0	0	0	0	0	0	0	0	0	1	0	0	0	0	0	1	0	1	1
	T. Turchetti and G. Maresi	2005	Phytosanitary criteria for the protection of chestnut orchards and stands against chestnut blight and ink disease	Proceedings of the Third International Chestnut Congress	0	0	0	1	0	0	1	1	0	0	1	0	0	0	0	0	0	0	0	0	0	0	0	0	0	0	1	0	0	0	0	0	1	0	0	0
	C. Colinas and M. Uscuplic	1999	Studies on chestnut blight (Cryphonectria parasitica (Murr.) Barr) in north-east Spain	Second International Symposium on Chestnut	0	0	0	1	0	0	1	0	0	0	0	1	0	0	0	0	0	0	0	1	1	0	0	0	0	0	0	0	0	0	0	0	0	0	1	0
	M. Uscuplic and M. Trestic	1999	Chestnut blight in Bosnia-Herzegovina and its control	Second International Symposium on Chestnut	0	0	0	1	0	0	1	0	0	0	1	0	1	0	0	0	0	0	0	0	0	0	0	1	0	1	0	0	0	0	0	0	1	0	0	0
	Ostrofsky, Reumpf, Struble, Bradbury	1988	Incidence of white pine blister rust in Maine after 70 years of a Ribes eradication program	Plant Diseases	0	0	0	1	0	0	1	0	0	0	1	0	0	0	0	0	0	0	0	0	0	0	0	0	1	0	0	0	0	0	0	0	0	0	0	0
	Redfern	1984	Factors affecting spread of Heterobasidion annosum in plantations	Proceeding of the sixth IUFRO Conference in Root and Butt Rots of Forest Trees	0	0	0	1	0	0	1	0	0	0	0	0	0	1	0	0	0	0	0	0	0	0	0	0	0	0	0	0	0	0	0	0	0	0	0	0
	Lung-Escarmant, Guyon, Chauvin, Courrier, Germain	1997	Spatial and temporal pattern of Armillaria root disease in a Pinus pinaster plantation: Incidence of understory clearing	Ninth international conference on Root and Butts rot IUFRO working party	0	0	0	1	0	0	1	0	0	0	0	0	0	1	0	0	0	0	0	0	0	0	0	1	0	0	0	0	0	0	0	0	0	0	0	0
	Morrison, Mallett	1996	Silvicultural management of Armillaria root disease in Western Canadian Forests	Canadian Journal of Plant Pathology-Revue Canadienne De Phytopathologie	0	0	0	1	0	0	1	0	0	0	1	0	0	0	0	0	0	0	0	0	0	0	0	0	0	0	0	0	0	0	0	0	0	0	0	0
	Hunt, R. S.	1998	Pruning western white pine in British Columbia to reduce white pine blister rust losses: 10-year results.	Western journal of applied forestry	0	0	0	1	0	0	1	0	0	0	1	0	0	0	0	0	0	0	0	0	0	0	0	1	0	0	0	0	0	0	0	0	0	0	0	0
	Britton, K. O., Pepper, W. D., Loftis, D. L., & Chellemi, D. O	1994	Effect of timber harvest practices on populations of Cornus florida and severity of dogwood anthracnose in western North Carolina	. Plant disease	0	0	0	1	0	0	1	0	0	0	1	0	0	0	0	0	0	0	0	0	0	0	0	1	0	0	0	0	0	0	0	0	0	0	0	0
	Chellemi, D. O., Britton, K. O., & Swank, W. T.	1992	Influence of site factors on dogwood anthracnose in the Nantahala Mountain range of western North Carolina. Plant Disease	Plant Disease	0	0	0	1	0	0	1	0	0	0	1	0	0	0	0	0	0	0	0	0	0	0	0	0	0	0	1	0	0	0	0	0	0	0	0	0
	E. Portela, J. Aranha, A. Martins and A. L. Pires	1999	Soil factors, farmer's practices and chestnut ink disease: Some interactions	Second International Symposium on Chestnut	0	0	0	1	0	0	0	1	0	0	1	0	0	0	0	0	0	0	0	0	1	0	0	0	0	0	1	0	0	1	0	0	0	0	0	0
	J. A. McLaughlin and M. T. Dumas	1996	Pathological implications of partial cutting in boreal mixedwood stands	Advancing Boreal Mixedwood Management in Ontario: Proceedings of a Workshop	0	0	0	0	0	0	0	0	0	0	0	0	0	0	0	0	0	0	0	0	0	0	0	0	0	0	0	0	0	0	0	0	0	0	0	0
	J. Willig	2003	Can ecologically managed forests minimize forest protection riscs? A comparative study of ecologically and conventionally managed mixed stands of scotch pine and beech	Allgemeine Forst Und Jagdzeitung	0	0	0	0	0	0	0	0	0	0	0	0	0	0	0	0	0	0	0	0	0	0	0	0	0	0	0	0	0	0	0	0	0	0	0	0
	M. S. Wolfe and Bcpc	2002	The role of functional biodiversity in managing pests and diseases in organic production systems	Bcpc Conference - Pests & Diseases 2002, Vols 1 and 2	0	0	0	0	0	0	0	0	0	0	0	0	0	0	0	0	0	0	0	0	0	0	0	0	0	0	0	0	0	0	0	0	0	0	0	0
	S. N. Agbaba, N. Celepirovic and M. C. Perica	2011	PROTECTION OF SWEET CHESTNUT STANDS	Sumarski List	0	0	0	1	0	0	1	0	0	0	0	1	1	0	0	0	0	0	0	0	0	0	0	0	0	0	1	0	0	0	0	0	0	0	0	0
	T. Dubravac and S. Dekanic	2009	STRUCTURE AND DYNAMICS OF THE HARVEST OF DEAD AND DECLINING TREES OF PEDUNCULATE OAK IN THE STANDS OF SPACVA FOREST FROM 1996 TO 2006	Sumarski List	0	0	0	1	0	0	1	0	0	0	0	1	1	0	0	0	0	0	0	0	0	0	0	1	0	0	0	0	0	0	0	0	0	0	0	0
	A. Kuroda, S. Ikeda, S. Mukai and G. Toyohara	2006	Successive mapping of secondary pine forests affected by pine wilt disease and subsequent forest management in Miyajima Island, SW Japan	Phytocoenologia	0	0	0	1	0	0	1	0	0	0	0	0	1	0	0	0	0	0	0	0	0	0	0	1	0	0	0	0	0	0	0	0	0	1	0	0
	G. E. Walker and B. G. Morey	1999	Effects of chemicals and microbial antagonists on nematodes and fungal pathogens of citrus roots	Australian Journal of Experimental Agriculture	0	0	0	1	0	1	1	0	0	0	1	0	0	0	0	0	0	0	0	0	0	0	0	0	0	0	0	0	0	0	0	0	1	0	0	1
	G. Alvarez, I. Etxebeste, D. Gallego, G. David, L. Bonifacio, H. Jactel, E. Sousa and J. A. Pajares	2015	Optimization of traps for live trapping of Pine Wood Nematode vector Monochamus galloprovincialis	Journal of Applied Entomology	0	0	0	1	1	1	0	0	0	0	0	0	0	0	0	0	0	0	0	0	0	0	0	0	0	0	0	1	0	0	0	0	0	0	0	1
	G. Alvarez-Baz, M. Fernandez-Bravo, J. Pajares and E. Quesada-Moraga	2015	Potential of native Beauveria pseudobassiana strain for biological control of Pine Wood Nematode vector Monochamus galloprovincialis	Journal of Invertebrate Pathology	0	0	0	1	1	1	0	0	0	0	0	0	0	0	0	0	0	0	0	0	0	0	0	0	0	0	0	0	0	0	0	0	1	0	0	1
	C. G. Park, J. K. Son, B. H. Lee, J. H. Cho and Y. L. Ren	2014	Comparison of Ethanedinitrile (C2N2) and Metam Sodium for Control of Bursaphelenchus xylophilus (Nematoda: Aphelenchidae) and Monochamus alternatus (Coleoptera: Cerambycidae) in Naturally Infested Logs at Low Temperatures	Journal of Economic Entomology	0	0	0	1	1	1	0	0	0	0	1	0	0	0	0	0	0	0	0	0	0	0	0	0	0	0	0	0	0	0	0	0	1	0	0	1
	T. Turchetti and G. Maresi	2009	Biological Control of Chestnut Diseases in Italy: Effectiveness of Blight and Ink Disease Management	International Workshop on Chestnut Management in Mediterranean Countries - Problems and Prospects	0	0	0	1	0	0	1	1	0	0	0	0	1	0	0	0	0	0	0	0	1	0	0	0	0	0	0	0	0	0	0	0	1	0	0	1
	J. Buiteveld, B. Van der Werf and J. A. Hiemstra	2015	Comparison of commercial elm cultivars and promising unreleased Dutch clones for resistance to Ophiostoma novo-ulmi	Iforest-Biogeosciences and Forestry	0	0	0	1	0	0	1	0	0	0	0	1	0	0	0	0	0	0	0	0	0	0	0	0	0	0	0	0	0	0	0	0	0	0	1	1
	P. E. Busby, K. G. Peay and G. Newcombe	2016	Common foliar fungi of Populus trichocarpa modify Melampsora rust disease severity	New Phytologist	0	0	0	1	0	0	1	0	0	0	0	0	1	0	0	0	0	0	0	0	0	0	0	0	0	0	0	0	0	0	0	0	1	0	0	1
	A. Cerqueira, A. Alves, H. Berenguer, B. Correia, A. Gomez-Cadenas, J. J. Diez, P. Monteiro and G. Pinto	2017	Phosphite shifts physiological and hormonal profile of Monterey pine and delays Fusarium circinatum progression	Plant Physiology and Biochemistry	0	0	0	1	0	0	1	0	0	0	0	0	1	0	0	0	0	0	0	0	0	0	0	0	0	0	0	0	0	0	0	0	1	0	0	1
	T. T. Chang and R. J. Chang	1999	Generation of volatile ammonia from urea fungicidal to Phellinus noxius in infested wood in soil under controlled conditions	Plant Pathology	0	0	0	1	0	0	1	0	0	0	1	0	0	0	0	0	0	0	0	0	0	0	0	0	0	0	0	0	0	0	0	0	1	0	0	1
	R. L. F. de Vasconcellos and E. Cardoso	2009	Rhizospheric streptomycetes as potential biocontrol agents of Fusarium and Armillaria pine rot and as PGPR for Pinus taeda	Biocontrol	0	0	0	1	0	0	1	0	0	0	1	0	0	0	0	0	0	0	0	0	0	0	0	0	0	0	0	0	0	0	0	0	1	0	0	1
	S. Diamandis, C. Perlerou, Z. Nakopoulou, V. Christopoulos, E. Topalidou and G. Tziros	2014	Application of Biological Control of Chestnut Blight on a Nationwide Scale in Greece: Results and Prospects	Ii European Congress on Chestnut	0	0	0	1	0	0	1	0	0	0	0	1	1	0	0	0	0	0	0	0	0	0	0	0	0	0	0	0	0	0	0	0	1	0	0	1
	T. Fernando, C. K. Jayasinghe, R. L. C. Wijesundera, W. P. K. Silva and E. Nishantha	2010	Evaluation of screening methods against Corynespora leaf fall disease of rubber (Hevea brasiliensis)	Journal of Plant Diseases and Protection	0	0	0	1	0	0	1	0	0	0	0	1	0	0	0	0	0	0	0	0	0	0	0	0	0	0	0	0	0	0	0	0	0	0	1	1
	K. N. E. Fitza, K. G. Payn, E. T. Steenkamp, A. A. Myburg and S. Naidoo	2013	Chitosan application improves resistance to Fusarium circinatum in Pinus patula	South African Journal of Botany	0	0	0	1	0	0	1	0	0	0	0	1	0	0	0	0	0	0	0	0	0	0	0	0	0	0	0	0	0	0	0	0	1	0	0	1
	S. Fraser, J. Martin-Garcia, A. Perry, M. S. Kabir, T. Owen, A. Solla, A. V. Brown, L. S. Bulman, I. Barnes, M. D. Hale, M. W. Vasconcelos, K. J. Lewis, H. T. Dogmus-Lehtijarvi, S. Markovskaja, S. Woodward and R. E. Bradshaw	2016	A review of Pinaceae resistance mechanisms against needle and shoot pathogens with a focus on the Dothistroma-Pinus interaction	Forest Pathology	0	0	0	1	0	0	1	0	0	0	0	1	0	0	0	0	0	0	0	0	0	0	0	0	0	0	0	0	0	0	0	0	0	0	1	1
	R. J. Ganley, R. A. Sniezko and G. Newcombe	2008	Endophyte-mediated resistance against white pine blister rust in Pinus monticola	Forest Ecology and Management	0	0	0	1	0	0	1	0	0	0	0	1	0	0	0	0	0	0	0	0	0	0	0	0	0	0	0	0	0	0	0	0	1	0	0	1
	D. Grans, F. Isik, R. C. Purnell and S. E. McKeand	2016	Genetic Variation in Response to Herbicide and Fertilization Treatments for Growth and Form Traits in Loblolly Pine	Forest Science	0	0	0	1	0	0	1	0	0	0	1	0	0	0	0	0	0	0	0	0	0	0	0	0	0	0	0	0	0	0	0	0	1	0	0	1
	I. A. Hood, M. O. Kimberley and J. F. Gardner	2006	Stock-type susceptibility and delineation of treatment areas for a cryptic Pinus radiata root disease	Phytopathology	0	0	0	1	0	0	1	0	0	0	0	1	0	0	0	0	0	0	0	0	0	0	0	0	0	0	0	0	0	0	0	0	0	0	1	1
	I. A. Hood, M. O. Kimberley and J. F. Gardner	2009	Susceptibility to Armillaria novae-zelandiae among clones of Pinus radiata	Forest Pathology	0	0	0	1	0	0	1	0	0	0	0	1	0	0	0	0	0	0	0	0	0	0	0	0	0	0	0	0	0	0	0	0	0	0	1	1
	E. Iturritxa, R. J. Ganley, R. Raposo, I. Garcia-Serna, N. Mesanza, S. C. Kirkpatrick and T. R. Gordon	2013	Resistance levels of Spanish conifers against Fusarium circinatum and Diplodia pinea	Forest Pathology	0	0	0	1	0	0	1	0	0	0	0	1	0	0	0	0	0	0	0	0	0	0	0	0	0	0	0	0	0	0	0	0	0	0	1	1
	L. Jankevica, I. Samsone, S. Minova, R. Seskena, J. Halimona, Z. Metla, V. Laugale, R. Rancane, M. Daugavietis, I. Zarins and Sgem	2013	ELABORATION OF NEW ENVIRONMENTALLY FRIENDLY PLANT PROTECTION PRODUCT FROM CONIFEROUS TREES BIOMASS AGAINST PLANT DISEASES	Geoconference on Ecology, Economics, Education and Legislation, Sgem 2013, Vol I	0	0	0	1	0	0	1	0	0	0	1	0	0	0	0	0	0	0	0	0	0	0	0	0	0	0	0	0	0	0	0	0	1	0	0	1
	J. N. King, A. David, D. Noshad and J. Smith	2010	A review of genetic approaches to the management of blister rust in white pines	Forest Pathology	0	0	0	1	0	0	1	0	0	0	0	1	0	0	0	0	0	0	0	0	0	0	0	0	0	0	0	0	0	0	0	0	0	0	1	1
	P. Kong and C. X. Hong	2017	Biocontrol of boxwood blight by Trichoderma koningiopsis Mb2	Crop Protection	0	0	0	1	0	0	1	0	0	0	1	0	0	0	0	0	0	0	0	0	0	0	0	0	0	0	0	0	0	0	0	0	1	0	0	1
	K. M. Little and R. G. Payn	2016	Screening of fungicides for the management of wattle rust (Uromycladium acaciae) in Acacia mearnsii plantations, South Africa	Southern Forests	0	0	0	1	0	0	1	0	0	0	1	0	0	0	0	0	0	0	0	0	0	0	0	0	0	0	0	0	0	0	0	0	1	0	0	1
	S. Lodha and L. N. Harsh	2010	Combined Effects of Bio Control Agents and Residues on Root Rot Mortality in Indian Mesquite (Prosopis cineraria)	Vii International Symposium on Chemical and Non-Chemical Soil and Substrate Disinfestation	0	0	0	1	0	0	1	0	0	0	1	0	0	0	0	0	0	0	0	0	0	0	0	0	0	0	0	0	0	0	0	0	1	0	0	1
	A. Perry, W. Wachowiak, A. V. Brown, R. A. Ennos, J. E. Cottrell and S. Cavers	2016	Substantial heritable variation for susceptibility to Dothistroma septosporum within populations of native British Scots pine (Pinus sylvestris)	Plant Pathology	0	0	0	1	0	0	1	0	0	0	0	1	0	0	0	0	0	0	0	0	0	0	0	0	0	0	0	0	0	0	0	0	0	0	1	1
	P. Pollegioni, G. Van der Linden, A. Belisario, M. Gras, N. Anselmi, I. Olimpieri, L. Luongo, A. Santini, E. Turco, G. S. Mugnozza and M. E. Malvolti	2012	Mechanisms governing the responses to anthracnose pathogen in Juglans spp	Journal of Biotechnology	0	0	0	1	0	0	1	0	0	0	0	1	0	0	0	0	0	0	0	0	0	0	0	0	0	0	0	0	0	0	0	0	0	0	1	1
	R. Rancane, L. Vilka and B. Bankina	2013	UREA APPLICATION AS A SANITATION PRACTICE TO MANAGE PEAR SCAB	Research for Rural Development 2013, Vol 1	0	0	0	1	0	0	1	0	0	0	1	0	0	0	0	0	0	0	0	0	0	0	0	0	0	0	0	0	0	0	0	0	1	0	0	1
	T. Reglinski, J. T. Taylor, A. A. Chee and M. Spiers	2015	Enhancing resistance in Pinus radiata seedlings to terminal crook (Colletotrichum acutatum) using methyl jasmonate and ultraviolet-C radiation	Forest Pathology	0	0	0	1	0	0	1	0	0	0	0	1	0	0	0	0	0	0	0	0	0	0	0	0	0	0	0	0	0	0	0	0	1	0	0	1
	N. Samils, A. Olson and J. Stenlid	2008	The capacity in Heterobasidion annosum s.l. to resist overgrowth by the biocontrol agent Phlebiopsis gigantea is a heritable trait	Biological Control	0	0	0	1	0	0	1	0	0	0	1	0	0	0	0	0	0	0	0	0	0	0	0	0	0	0	0	0	0	0	0	0	1	0	0	1
	D. G. Schmale and T. R. Gordon	2003	Variation in susceptibility to pitch canker disease, caused by Fusarium circinatum, in native stands of Pinus muricata	Plant Pathology	0	0	0	1	0	0	1	0	0	0	0	1	0	0	0	0	0	0	0	0	0	0	0	0	0	0	0	0	0	0	0	0	0	0	1	1
	R. A. Schmidt	2003	Fusiform rust of southern pines: A major success for forest disease management	Phytopathology	0	0	0	1	0	0	1	0	0	0	0	1	0	0	0	0	0	0	0	0	0	0	0	0	0	0	0	0	0	0	0	0	0	0	1	1
	A. H. Smith, T. J. Wardlaw, E. A. Pinkard, D. Ratkowsky and C. L. Mohammed	2017	Impacts of Teratosphaeria leaf disease on plantation Eucalyptus globulus productivity	Forest Pathology	0	0	0	1	0	0	1	0	0	0	0	0	1	0	0	0	0	0	0	0	0	0	0	0	0	0	0	0	0	0	0	0	1	1	0	1
	R. A. Sniezko	2006	Resistance breeding against nonnative pathogens in forest trees - current successes in North America	Canadian Journal of Plant Pathology-Revue Canadienne De Phytopathologie	0	0	0	1	0	0	1	0	0	0	0	1	0	0	0	0	0	0	0	0	0	0	0	0	0	0	0	0	0	0	0	0	0	0	1	1
	A. J. Storer, P. Bonello, T. R. Gordon and D. L. Wood	1999	Evidence of resistance to the pitch canker pathogen (Fusarium circinatum) in native stands of monterey pine (Pinus radiata)	Forest Science	0	0	0	1	0	0	1	0	0	0	0	1	0	0	0	0	0	0	0	0	0	0	0	0	0	0	0	0	0	0	0	0	1	0	0	1
	W. G. Thies, R. G. Kelsey, D. J. Westlind and J. Madsen	2006	Potassium fertilizer applied immediately after planting had no impact on Douglas-fir seedling mortality caused by laminated root rot on a forested site in Washington State	Forest Ecology and Management	0	0	0	1	0	0	1	0	0	0	0	1	0	0	0	0	0	0	0	0	0	0	0	0	0	0	0	0	0	0	0	0	1	0	0	1
	W. G. Thies and D. J. Westlind	2006	Application of chloropicrin to Douglas-fir stumps to control laminated root rot does not affect infection or growth of regeneration 16 growing seasons after treatment	Forest Ecology and Management	0	0	0	1	0	0	1	0	0	0	1	0	0	0	0	0	0	0	0	0	0	0	0	0	0	0	0	0	0	0	0	0	1	0	0	1
	E. Trapiello, G. Gonzalez-Varela and A. J. Gonzalez	2015	Chestnut blight control by agrochemicals in Castanea sativa under managed conditions	Journal of Plant Diseases and Protection	0	0	0	1	0	0	1	0	0	0	1	0	1	0	0	0	0	0	0	0	0	0	0	0	0	0	0	0	0	0	0	0	1	0	0	1
	P. Trivedi, M. Delgado-Baquerizo, C. Trivedi, K. Hamonts, I. C. Anderson and B. K. Singh	2017	Keystone microbial taxa regulate the invasion of a fungal pathogen in agro-ecosystems	Soil Biology & Biochemistry	0	0	0	1	0	0	1	0	0	0	1	0	0	0	0	0	0	0	0	0	0	0	0	0	0	0	0	0	0	0	0	0	1	0	0	1
	J. Zhao, M. J. Liu, X. Y. Liu and Z. H. Zhao	2009	Identification of Resistant Cultivar for Jujube Witches' Broom Disease and Development of Management Strategies	I International Jujube Symposium	0	0	0	1	0	0	1	0	0	0	0	1	0	0	0	0	0	0	0	0	0	0	0	0	0	0	0	0	0	0	0	0	1	0	1	1
	D. M. Cahill, J. E. Rookes, B. A. Wilson, L. Gibson and K. L. McDougall	2008	Phytophthora cinnamomi and Australia's biodiversity: impacts, predictions and progress towards control	Australian Journal of Botany	0	0	0	1	0	0	0	1	0	0	0	1	0	0	0	0	0	0	0	0	0	0	0	0	0	0	0	0	0	0	0	0	1	0	0	1
	A. Chandelier, C. Husson, P. Druart and B. Marcais	2016	Assessment of inoculation methods for screening black alder resistance to Phytophthoraxalni	Plant Pathology	0	0	0	1	0	0	0	1	0	0	0	1	0	0	0	0	0	0	0	0	0	0	0	0	0	0	0	0	0	0	0	0	0	0	1	1
	M. Garbelotto, T. Y. Harnik and D. J. Schmidt	2009	Efficacy of phosphonic acid, metalaxyl-M and copper hydroxide against Phytophthora ramorum in vitro and in planta	Plant Pathology	0	0	0	1	0	0	0	1	0	0	0	1	0	0	0	0	0	0	0	0	0	0	0	0	0	0	0	0	0	0	0	0	1	0	0	1
	M. Garbelotto and D. J. Schmidt	2009	Phosphonate controls sudden oak death pathogen for up to 2 years	California Agriculture	0	0	0	1	0	0	0	1	0	0	0	1	0	0	0	0	0	0	0	0	0	0	0	0	0	0	0	0	0	0	0	0	1	0	0	1
	E. Gouveia, V. Coelho, F. Fonseca, L. Nunes and L. Monteiro	2010	Systemic Immunity against Soil Borne Phytophthora and Control of Ink Disease of Chestnut by Foliar Spray of Potassium Phosphonate	I European Congress on Chestnut - Castanea 2009	0	0	0	1	0	0	0	1	0	0	1	0	0	0	0	0	0	0	0	0	0	0	0	0	0	0	0	0	0	0	0	0	1	0	0	1
	M. E. Gouveia and L. F. Nunes	2014	Assessing Phytophthora Zoospore Activity to Enhance Disease Management and Promote Ecological Surveillance of Chestnut Ink Disease	Ii European Congress on Chestnut	0	0	0	1	0	0	0	1	0	0	0	1	0	0	0	0	0	0	0	0	0	0	0	0	0	0	0	0	0	0	0	0	0	0	1	1
	K. J. Hayden, M. Garbelotto, R. Dodd and J. W. Wright	2013	Scaling up from greenhouse resistance to fitness in the field for a host of an emerging forest disease	Evolutionary Applications	0	0	0	1	0	0	0	1	0	0	0	1	0	0	0	0	0	0	0	0	0	0	0	0	0	0	0	0	0	0	0	0	0	0	1	1
	K. J. Hayden, A. Lundquist, D. J. Schmidt, R. A. Sniezko, S. J. Frankel and M. Garbelotto	2010	Tanoak Resistance: Can it be Used to Sustain Populations?	Proceedings of the Sudden Oak Death Fourth Science Symposium	0	0	0	1	0	0	0	1	0	0	0	1	0	0	0	0	0	0	0	0	0	0	0	0	0	0	0	0	0	0	0	0	0	0	1	1
	C. Morales-Rodriguez, A. M. Vettraino and A. Vannini	2016	Efficacy of Biofumigation with Brassica carinata Commercial Pellets (BioFence) to Control Vegetative and Reproductive Structures of Phytophthora cinnamomi	Plant Disease	0	0	0	1	0	0	0	1	0	0	1	0	0	0	0	0	0	0	0	0	0	0	0	0	0	0	0	0	0	0	0	0	1	0	0	1
	A. Promwee, P. Yenjit, M. Issarakraisila, W. Intana and C. Chamswarng	2017	Efficacy of indigenous Trichoderma harzianum in controlling Phytophthora leaf fall (Phytophthora palmivora) in Thai rubber trees	Journal of Plant Diseases and Protection	0	0	0	1	0	0	0	1	0	0	1	0	0	0	0	0	0	0	0	0	0	0	0	0	0	0	0	0	0	0	0	0	1	0	0	1
	T. Reglinski, T. M. Spiers, M. A. Dick, J. T. Taylor and J. Gardner	2009	Management of phytophthora root rot in radiata pine seedlings	Plant Pathology	0	0	0	1	0	0	0	1	0	0	1	0	0	0	0	0	0	0	0	0	0	0	0	0	0	0	0	0	0	0	0	0	1	0	0	1
	B. L. Shearer and R. G. Fairman	2007	Application of phosphite in a high-volume foliar spray delays and reduces the rate of mortality of four Banksia species infected with Phytophthora cinnamomi	Australasian Plant Pathology	0	0	0	1	0	0	0	1	0	0	1	0	0	0	0	0	0	0	0	0	0	0	0	0	0	0	0	0	0	0	0	0	1	0	0	1
	T. J. Swiecki and E. Bernhardt	2010	Assessing Methods to Protect Susceptible Oak and Tanoak Stands from Sudden Oak Death	Proceedings of the Sudden Oak Death Fourth Science Symposium	0	0	0	1	0	0	0	1	0	0	1	0	0	0	0	0	0	0	0	0	0	0	0	0	0	0	0	0	0	0	0	0	1	0	0	1
	T. Thomidis, J. Cullum, K. Elena and S. N. Jeffers	2001	Relative resistance of four peach rootstocks to Phytophthora cactorum and Phytophthora megasperma	Journal of Phytopathology-Phytopathologische Zeitschrift	0	0	0	1	0	0	0	1	0	0	0	1	0	0	0	0	0	0	0	0	0	0	0	0	0	0	0	0	0	0	0	0	0	0	1	1
	R. I. Alfaro	1996	Role of genetic resistance in managing ecosystems susceptible to white pine weevil	Forestry Chronicle	0	0	0	1	1	0	0	0	0	0	1	0	0	0	0	0	1	1	0	1	1	0	0	0	0	0	0	0	0	0	0	0	0	0	0	1
	R. I. Alfaro, J. H. Borden, R. G. Fraser and A. Yanchuk	1995	THE WHITE-PINE WEEVIL IN BRITISH-COLUMBIA - BASIS FOR AN INTEGRATED PEST-MANAGEMENT SYSTEM	Forestry Chronicle	0	0	0	1	1	0	0	0	0	0	0	1	0	0	0	0	0	0	0	0	1	0	0	1	0	0	1	0	0	0	0	0	1	0	1	1
	R. I. Alfaro and A. Fuentealba	2016	Insects affecting regenerating conifers in Canada: natural history and management	Canadian Entomologist	0	0	0	1	1	0	0	0	0	0	1	0	0	0	0	0	1	0	0	0	0	0	0	0	0	0	0	0	0	0	0	0	0	0	1	1
	J. J. Ball and C. A. Taecker	2013	The Survival of Mountain Pine Beetle in Unpeeled Logs	Western Journal of Applied Forestry	0	0	0	1	1	0	0	0	0	0	0	0	0	1	0	0	0	0	0	0	0	0	0	1	0	0	0	0	0	0	0	0	0	0	0	1
	A. Battisti, A. Boato and L. Masutti	2000	Influence of silvicultural practices and population genetics on management of the spruce sawfly, Cephalcia arvensis	Forest Ecology and Management	0	0	0	1	1	0	0	0	0	0	0	1	0	0	0	1	0	0	0	0	1	0	0	0	0	0	1	0	0	0	0	0	1	1	0	1
	A. Berland and G. P. Elliott	2014	Unexpected connections between residential urban forest diversity and vulnerability to two invasive beetles	Landscape Ecology	0	0	0	1	1	0	0	0	0	0	0	1	0	0	0	0	0	0	0	0	1	0	0	0	0	0	0	0	0	0	0	0	0	0	0	1
	C. Bjorkman, H. Bylund, U. Nilsson, G. Nordlander and M. Schroeder	2015	Effects of New Forest Management on Insect Damage Risk in a Changing Climate	Climate Change and Insect Pests	0	0	0	1	1	0	0	0	0	0	1	0	0	0	0	0	0	0	0	0	1	0	0	0	0	0	1	0	0	0	0	0	0	1	0	1
	F. Bognounou, L. De Grandpre, D. S. Pureswaran and D. Kneeshaw	2017	Temporal variation in plant neighborhood effects on the defoliation of primary and secondary hosts by an insect pest	Ecosphere	0	0	0	1	1	0	0	0	0	0	0	0	0	1	0	0	0	0	0	0	1	0	0	0	0	0	0	0	0	0	0	0	0	1	0	1
	C. Bouget and T. Noblecourt	2005	Short-term development of ambrosia and bark beetle assemblages following a windstorm in French broadleaved temperate forests	Journal of Applied Entomology	0	0	0	1	1	0	0	0	0	0	1	0	0	0	0	0	0	1	0	0	0	0	0	0	0	0	1	0	1	0	0	0	0	0	0	1
	S. Bowman and S. M. Smith	2012	A management strategy for emerald ash borer in St. Lawrence Islands National Park	Forestry Chronicle	0	0	0	1	1	0	0	0	0	0	0	1	0	1	0	0	0	0	0	0	0	0	0	0	1	0	0	1	0	0	0	0	0	0	0	1
	S. K. Braman, J. G. Latimer, R. D. Oetting, R. D. McQueen, T. B. Eckberg and M. Prinster	2000	Management strategy, shade, and landscape composition effects on urban landscape plant quality and arthropod abundance	Journal of Economic Entomology	0	0	0	1	1	0	0	0	0	0	1	1	0	0	0	0	0	0	0	1	1	0	0	0	1	0	1	0	0	0	0	0	1	0	0	1
	S. T. Brantley, A. E. Mayfield, R. M. Jetton, C. F. Miniat, D. R. Zietlow, C. L. Brown and J. R. Rhea	2017	Elevated light levels reduce hemlock woolly adelgid infestation and improve carbon balance of infested eastern hemlock seedlings	Forest Ecology and Management	0	0	0	1	1	0	0	0	0	0	0	1	0	0	0	0	0	0	0	0	0	0	0	0	0	0	1	0	0	0	0	0	0	1	0	1
	E. G. Brockerhoff, A. M. Liebhold and H. Jactel	2006	The ecology of forest insect invasions and advances in their management	Canadian Journal of Forest Research-Revue Canadienne De Recherche Forestiere	0	0	0	1	1	0	0	0	0	0	1	0	0	1	0	0	0	0	0	0	1	0	0	0	0	0	0	0	0	0	0	0	0	0	0	1
	H. F. Cerezke	1994	WARREN ROOTCOLLAR WEEVIL, HYLOBIUS-WARRENI WOOD (COLEOPTERA, CURCULIONIDAE), IN CANADA - ECOLOGY, BEHAVIOR, DAMAGE RELATIONSHIPS, AND MANAGEMENT	Canadian Entomologist	0	0	0	1	1	0	0	0	0	0	0	1	0	0	0	0	0	0	0	0	0	0	0	0	0	0	1	0	0	0	0	0	0	0	0	1
	W. M. Ciesla	2015	The role of human activities on forest insect outbreaks worldwide	International Forestry Review	0	0	0	1	1	0	0	0	0	0	1	0	0	1	0	0	0	0	0	0	1	0	0	1	0	0	0	1	0	0	0	0	0	0	0	1
	N. C. Coops, J. A. Timko, M. A. Wulder, J. C. White and S. M. Ortlepp	2008	Investigating the effectiveness of Mountain Pine Beetle mitigation strategies	International Journal of Pest Management	0	0	0	1	1	0	0	0	0	0	1	1	1	1	1	0	0	1	0	0	1	0	0	0	0	0	0	0	0	0	1	0	1	0	0	1
	D. R. Coyle	2002	Effects of clone, silvicultural, and miticide treatments on cottonwood leafcurl mite (Acari : Eriophyidae) damage in plantation Populus	Environmental Entomology	0	0	0	1	1	0	0	0	0	0	0	1	1	0	0	0	0	0	0	0	0	0	0	0	0	0	0	0	0	0	0	1	1	1	0	1
	J. T. Cronin, P. Turchin, J. L. Hayes and C. A. Steiner	1999	Area-wide efficacy of a localized forest pest management practice	Environmental Entomology	0	0	0	1	1	0	0	0	0	0	0	0	0	1	0	0	0	0	0	0	0	0	0	1	0	0	0	0	0	0	0	0	0	0	0	1
	K. I. Dodds, R. R. Cooke and D. W. Gilmore	2007	Silvicultural options to reduce pine susceptibility to attack by a newly detected invasive species, Sirex noctilio	Northern Journal of Applied Forestry	0	0	0	1	1	0	0	0	0	0	1	0	0	0	0	1	0	0	0	0	1	0	0	0	0	0	1	0	0	0	0	0	0	0	0	1
	K. J. Dodds, P. de Groot and D. A. Orwig	2010	The impact of Sirex noctilio in Pinus resinosa and Pinus sylvestris stands in New York and Ontario	Canadian Journal of Forest Research-Revue Canadienne De Recherche Forestiere	0	0	0	1	1	0	0	0	0	0	1	0	0	0	0	1	0	1	0	0	0	0	0	0	0	0	0	0	0	0	0	0	0	0	0	1
	A. M. Dulaurent, A. J. Porte, I. van Halder, F. Vetillard, P. Menassieu and H. Jactel	2012	Hide and seek in forests: colonization by the pine processionary moth is impeded by the presence of nonhost trees	Agricultural and Forest Entomology	0	0	0	1	1	0	0	0	0	0	1	0	0	1	0	0	0	0	0	0	1	1	0	0	1	0	0	0	0	0	0	0	0	0	0	1
	K. Dworschak, D. Meyer, A. Gruppe and R. Schopf	2014	Choice or constraint: Plasticity in overwintering sites of the European spruce bark beetle	Forest Ecology and Management	0	0	0	1	1	0	0	0	0	0	1	0	0	0	0	0	0	0	0	0	0	0	0	1	0	0	0	0	0	0	0	0	0	0	0	1
	J. Elek and T. Wardlaw	2013	Options for managing chrysomelid leaf beetles in Australian eucalypt plantations: reducing the chemical footprint	Agricultural and Forest Entomology	0	0	0	1	1	0	0	0	0	0	1	1	0	0	0	1	0	0	0	0	0	0	0	0	0	0	0	0	1	0	0	0	1	0	0	1
	J. Foit	2015	Bark- and wood-boring beetles on Scots pine logging residues from final felling: Effects of felling date, deposition location and diameter of logging residues	Annals of Forest Research	0	0	0	1	1	0	0	0	0	0	1	0	0	0	0	0	0	0	0	0	0	0	0	1	0	0	0	0	0	0	0	0	0	0	0	1
	M. Gilbert, N. Fielding, H. F. Evans and J. C. Gregoire	2003	Spatial pattern of invading Dendroctonus micans (Coleoptera : Scolytidae) populations in the United Kingdom	Canadian Journal of Forest Research-Revue Canadienne De Recherche Forestiere	0	0	0	1	1	0	0	0	0	0	0	0	0	1	0	0	0	0	0	1	1	1	0	0	0	0	0	0	0	0	0	0	0	0	0	1
	D. W. Gilmore, S. J. Seybold, J. C. Zasada, P. J. Anderson, D. N. Kastendick, K. J. K. Gandhi, H. P. Johnson and Saf	2001	Cumulative effects of a severe windstorm and subsequent silvicultural treatments on plant and arthropod diversity in the gunflint corridor of the superior national forest in Northern Minnesota: Project design	Proceedings of the Society of American Foresters, 2001 National Convention	0	0	0	1	1	0	0	0	0	0	1	0	0	0	1	0	0	0	0	0	0	0	0	1	0	0	0	0	0	0	1	0	0	0	0	1
	V. C. Griess and T. Knoke	2011	Growth performance, windthrow, and insects: meta-analyses of parameters influencing performance of mixed-species stands in boreal and northern temperate biomes	Canadian Journal of Forest Research-Revue Canadienne De Recherche Forestiere	0	0	0	1	1	0	0	0	0	0	0	0	0	0	0	0	0	0	0	0	1	0	0	0	0	0	0	0	0	0	0	0	0	0	0	1
	W. Grodzki, R. Jakus, E. Lajzova, Z. Sitkova, T. Maczka and J. Skvarenina	2006	Effects of intensive versus no management strategies during an outbreak of the bark beetle Ips typographus (L.) (Col.: Curculionidae, Scolytinae) in the Tatra Mts. in Poland and Slovakia	Annals of Forest Science	0	0	0	1	1	0	0	0	0	0	0	0	1	0	0	0	0	0	0	0	0	0	0	1	0	0	0	0	0	0	0	0	1	0	0	1
	M. Havasova, J. Ferencik and R. Jakus	2017	Interactions between windthrow, bark beetles and forest management in the Tatra national parks	Forest Ecology and Management	0	0	0	1	1	0	0	0	0	0	0	0	0	1	0	0	0	0	0	0	0	0	0	1	0	0	0	0	0	0	0	0	0	0	0	1
	N. P. Havill and K. F. Raffa	1999	Effects of elicitation treatment and genotypic variation on induced resistance in Populus: impacts on gypsy moth (Lepidoptera : Lymantriidae) development and feeding behavior	Oecologia	0	0	0	1	1	0	0	0	0	0	1	1	0	0	1	0	0	0	0	0	0	0	0	0	0	0	0	0	0	0	0	0	1	0	0	1
	F. Hebert and N. Thiffault	2015	Vegetation Management, Stock Type, and Scarification Effects on White Pine Weevil Incidence and Early Norway Spruce Growth in Quebec, Canada	Forest Science	0	0	0	1	1	0	0	0	0	0	1	0	0	0	0	0	0	0	0	1	1	0	0	0	0	0	1	0	0	0	0	0	0	0	0	1
	C. R. Hennigar and D. A. MacLean	2010	Spruce budworm and management effects on forest and wood product carbon for an intensively managed forest	Canadian Journal of Forest Research-Revue Canadienne De Recherche Forestiere	0	0	0	1	1	0	0	0	0	0	0	0	1	0	0	0	0	0	0	0	0	0	0	1	0	0	0	0	0	0	0	0	1	1	0	1
	J. D. Holland	2010	Isolating spatial effects on beta diversity to inform forest landscape planning	Landscape Ecology	0	0	0	1	1	0	0	0	0	0	0	0	0	1	0	0	0	0	0	0	0	0	0	0	0	0	0	0	1	0	0	0	0	0	0	1
	S. M. Hood, S. Baker and A. Sala	2016	Fortifying the forest: thinning and burning increase resistance to a bark beetle outbreak and promote forest resilience	Ecological Applications	0	0	0	1	1	0	0	0	0	0	0	1	0	0	0	0	0	0	0	0	0	0	0	0	0	0	1	0	0	0	1	0	0	0	0	1
	J. Horak, J. Holusa, P. Novakova, K. Lukasova, T. Loskotova and D. Romportl	2016	Agricultural landscapes with prevailing grasslands can mitigate the population densities of a tree-damaging alien species	Agriculture Ecosystems & Environment	0	0	0	1	1	0	0	0	0	0	1	0	0	0	0	0	0	0	0	0	0	0	0	0	0	0	0	0	1	0	0	0	0	0	0	1
	B. P. Hurley, J. Garnas, M. J. Wingfield, M. Branco, D. M. Richardson and B. Slippers	2016	Increasing numbers and intercontinental spread of invasive insects on eucalypts	Biological Invasions	0	0	0	1	1	0	0	0	0	0	0	0	0	1	0	0	0	0	0	0	0	0	0	0	0	0	0	1	0	0	0	0	0	0	0	1
	J. Iqbal, D. A. Maclean and J. A. Kershaw	2011	Balsam fir sawfly defoliation effects on survival and growth quantified from permanent plots and dendrochronology	Forestry	0	0	0	1	1	0	0	0	0	0	1	0	0	0	0	0	0	0	0	0	0	0	0	0	0	0	1	0	0	0	0	0	0	0	0	1
	N. Israely and S. D. Oman	2005	Effect of combined insecticide sprays and sanitation techniques on population dynamics of Ceratitis capitata (Diptera : Tephritidae) in the central mountains of Israel	Journal of Economic Entomology	0	0	0	1	1	0	0	0	0	0	1	0	0	0	0	0	0	0	0	0	0	0	0	1	0	0	0	0	0	0	0	0	1	0	0	1
	H. Jactel, M. Goulard, P. Menassieu and G. Goujon	2002	Habitat diversity in forest plantations reduces infestations of the pine stem borer Dioryctria sylvestrella	Journal of Applied Ecology	0	0	0	1	1	0	0	0	0	0	1	0	0	0	0	0	0	0	0	0	1	0	0	0	0	0	0	0	1	0	0	0	0	0	0	1
	T. Johansson, H. Gibb, J. Hilszczanski, R. B. Pettersson, J. Hjalten, O. Atlegrim, J. P. Ball and K. Danell	2006	Conservation-oriented manipulations of coarse woody debris affect its value as habitat for spruce-infesting bark and ambrosia beetles (Coleoptera : Scolytinae) in northern Sweden	Canadian Journal of Forest Research	0	0	0	1	1	0	0	0	0	0	1	0	0	0	0	0	0	0	0	0	0	0	0	1	0	0	0	0	0	0	1	0	0	0	0	1
	T. A. Johnson and R. C. Williamson	2007	Potential management strategies for the linden borer (Coleoptera : Cerambycidae) in urban landscapes and nurseries	Journal of Economic Entomology	0	0	0	1	1	0	0	0	0	0	1	1	0	0	0	0	0	0	0	0	0	0	0	1	0	0	0	0	0	0	0	0	1	0	0	1
	S. Karvemo, B. Rogell and M. Schroeder	2014	Dynamics of spruce bark beetle infestation spots: Importance of local population size and landscape characteristics after a storm disturbance	Forest Ecology and Management	0	0	0	1	1	0	0	0	0	0	1	0	0	0	0	0	0	0	0	0	0	0	0	1	0	0	0	0	0	0	0	0	0	0	0	1
	D. M. Kashian	2016	Sprouting and seed production may promote persistence of green ash in the presence of the emerald ash borer	Ecosphere	0	0	0	1	1	0	0	0	0	0	0	1	1	0	0	0	0	0	0	1	0	0	0	0	0	0	0	0	0	0	0	0	0	0	0	1
	M. Kautz, K. Dworschak, A. Gruppe and R. Schopf	2011	Quantifying spatio-temporal dispersion of bark beetle infestations in epidemic and non-epidemic conditions	Forest Ecology and Management	0	0	0	1	1	0	0	0	0	0	0	0	0	1	0	0	0	0	0	0	0	1	0	0	0	0	0	0	1	0	0	0	0	0	0	1
	M. J. Klapwijk, H. Bylund, M. Schroeder and C. Bjorkman	2016	Forest management and natural biocontrol of insect pests	Forestry	0	0	0	1	1	0	0	0	0	0	1	0	0	0	0	0	0	0	0	0	1	0	0	0	0	0	0	0	0	0	0	0	0	0	0	1
	P. Klasmer and E. Botto	2012	The Ecology and Biological Control of the Woodwasp Sirex noctilio in Patagonia, Argentina	Sirex Woodwasp and Its Fungal Symbiont: Research and Management of a Worldwide Invasive Pest	0	0	0	1	1	0	0	0	0	0	1	0	0	0	0	0	0	0	0	0	0	0	0	0	0	0	1	0	0	0	0	0	1	0	0	1
	L. Knebel, D. J. Robison, T. R. Wentworth and K. D. Klepzig	2008	Resin flow responses to fertilization, wounding and fungal inoculation in loblolly pine (Pinus taeda) in North Carolina	Tree Physiology	0	0	0	1	1	0	0	0	0	0	0	1	0	0	1	0	0	0	0	0	0	0	0	0	0	0	0	0	0	0	0	0	1	0	0	1
	K. S. Knight, J. P. Brown and R. P. Long	2013	Factors affecting the survival of ash (Fraxinus spp.) trees infested by emerald ash borer (Agrilus planipennis)	Biological Invasions	0	0	0	1	1	0	0	0	0	0	0	0	1	0	0	0	0	0	0	0	1	0	0	0	0	0	1	0	0	0	0	0	0	0	0	1
	G. Kohler, E. Pasalic, W. W. Weisser and M. M. Gossner	2015	Beech forest management does not affect the infestation rate of the beech scale Cryptococcus fagisuga across three regions in Germany	Agricultural and Forest Entomology	0	0	0	1	1	0	0	0	0	0	1	0	0	0	0	0	0	1	0	0	1	0	0	0	0	0	0	0	0	0	0	0	0	0	0	1
	T. E. Kolb, C. J. Fettig, M. P. Ayres, B. J. Bentz, J. A. Hicke, R. Mathiasen, J. E. Stewart and A. S. Weed	2016	Observed and anticipated impacts of drought on forest insects and diseases in the United States	Forest Ecology and Management	0	0	0	1	1	0	0	0	0	0	1	0	0	0	0	1	0	0	0	0	0	0	0	0	0	0	0	0	0	0	0	0	0	0	0	1
	A. M. Liebhold, R. M. Muzika and K. W. Gottschalk	1998	Does thinning affect gypsy moth dynamics?	Forest Science	0	0	0	1	1	0	0	0	0	0	1	0	0	0	0	0	0	0	0	0	0	0	0	0	0	0	1	0	0	0	0	0	0	0	0	1
	M. J. Lombardero, P. Vazquez-Mejuto and M. P. Ayres	2008	Role of plant enemies in the forestry of indigenous vs. nonindigenous pines	Ecological Applications	0	0	0	1	1	0	0	0	0	0	1	0	0	0	0	0	0	0	0	0	1	0	0	0	0	0	0	0	0	0	0	0	0	0	0	1
	D. G. McCullough, T. M. Poland and D. Cappaert	2009	Attraction of the emerald ash borer to ash trees stressed by girdling, herbicide treatment, or wounding	Canadian Journal of Forest Research-Revue Canadienne De Recherche Forestiere	0	0	0	1	1	0	0	0	0	0	0	1	0	0	1	0	0	0	0	0	0	0	0	0	0	0	0	0	0	0	0	0	0	0	0	1
	D. G. McCullough and C. S. Sadof	1998	Evaluation of an integrated management and compliance program for Tomicus piniperda (Coleoptera : Scolytidae) in pine christmas tree fields	Journal of Economic Entomology	0	0	0	1	1	0	0	0	0	0	1	0	0	0	0	0	0	0	0	0	0	0	0	1	0	0	0	0	0	0	0	0	1	0	0	1
	R. Moore, J. M. Brixey and A. D. Milner	2004	Effect of time of year on the development of immature stages of the Large Pine Weevil (Hylobius abietis L.) in stumps of Sitka spruce (Picea sitchensis Carr.) and influence of felling date on their growth, density and distribution	Journal of Applied Entomology	0	0	0	1	1	0	0	0	0	0	1	0	0	0	0	0	0	0	0	0	0	0	0	0	0	1	0	0	0	0	0	0	0	0	0	1
	R. E. Morgan, P. de Groot and S. M. Smith	2004	Susceptibility of pine plantations to attack by the pine shoot beetle (Tomicus piniperda) in southern Ontario	Canadian Journal of Forest Research	0	0	0	1	1	0	0	0	0	0	0	1	0	0	0	1	0	0	0	0	0	0	0	0	0	0	0	0	0	0	0	0	0	0	0	1
	V. G. Nealis, M. K. Noseworthy, R. Turnquist and V. R. Waring	2009	Balancing risks of disturbance from mountain pine beetle and western spruce budworm	Canadian Journal of Forest Research-Revue Canadienne De Recherche Forestiere	0	0	0	1	1	0	0	0	0	0	1	0	0	0	0	0	0	0	0	0	1	0	0	0	0	0	0	0	0	0	0	0	0	0	0	1
	L. Peacock and S. Herrick	2000	Responses of the willow beetle Phratora vulgatissima to genetically and spatially diverse Salix spp. plantations	Journal of Applied Ecology	0	0	0	1	1	0	0	0	0	0	1	0	0	0	0	0	0	0	0	0	1	0	0	0	0	0	0	0	0	0	0	0	0	0	0	1
	H. A. Petrillo and J. A. Witter	2005	Regeneration of American beech (fagus grandifolia EHRH.) in Michigan: Integractions of beech bark disease and management practices	Beech Bark Disease: Proceedings of the Beech Bark Disease Symposium	0	0	0	1	1	0	0	0	0	0	0	0	1	0	0	0	0	0	0	0	0	0	0	1	0	0	1	0	0	0	0	0	0	0	0	1
	S. C. Prueitt and D. W. Ross	1998	Effects of environment and host genetics on Eucosma sonomana (Lepidoptera : Tortricidae) infestation levels	Environmental Entomology	0	0	0	1	1	0	0	0	0	0	0	1	0	0	0	0	0	0	0	1	0	0	0	0	0	0	1	0	0	0	0	0	0	0	0	1
	C. M. Ranger, M. E. Reding, P. B. Schultz and J. B. Oliver	2013	Influence of flood-stress on ambrosia beetle host-selection and implications for their management in a changing climate	Agricultural and Forest Entomology	0	0	0	1	1	0	0	0	0	0	1	0	0	0	0	0	0	0	0	0	0	0	0	0	0	0	0	0	0	0	0	1	0	0	0	1
	C. M. Ranger, M. E. Reding, P. B. Schultz, J. B. Oliver, S. D. Frank, K. M. Addesso, J. H. Chong, B. Sampson, C. Werle, S. Gill and C. Krause	2016	Biology, Ecology, and Management of Nonnative Ambrosia Beetles (Coleoptera: Curculionidae: Scolytinae) in Ornamental Plant Nurseries	Journal of Integrated Pest Management	0	0	0	1	1	0	0	0	0	0	1	0	0	0	0	1	0	0	0	0	0	0	0	0	0	0	0	0	0	0	0	1	0	0	0	1
	D. Rassati, M. Faccoli, A. Battisti and L. Marini	2016	Habitat and climatic preferences drive invasions of non-native ambrosia beetles in deciduous temperate forests	Biological Invasions	0	0	0	1	1	0	0	0	0	0	1	1	0	0	0	0	1	0	0	0	1	0	0	0	0	0	0	0	0	0	0	0	0	0	0	1
	M. Regolini, B. Castagneyrol, A. M. Dulaurent-Mercadal, D. Piou, J. C. Samalens and H. Jactel	2014	Effect of host tree density and apparency on the probability of attack by the pine processionary moth	Forest Ecology and Management	0	0	0	1	1	0	0	0	0	0	1	0	0	0	0	0	0	0	0	0	0	0	0	0	0	0	1	0	0	0	0	0	0	0	0	1
	A. Sciarretta, L. Marziali, M. Squarcini, L. Marianelli, D. Benassai, F. Logli and P. F. Roversi	2016	Adaptive management of invasive pests in natural protected areas: the case of Matsucoccus feytaudi in Central Italy	Bulletin of Entomological Research	0	0	0	1	1	0	0	0	0	0	0	0	0	1	0	0	0	0	0	0	0	0	0	1	0	0	0	0	0	0	0	0	0	0	0	1
	W. T. Stamps and M. J. Linit	1997	Plant diversity and arthropod communities: Implications for temperate agroforestry	Agroforestry Systems	0	0	0	1	1	0	0	0	0	0	1	0	0	0	0	0	0	0	0	0	1	0	0	0	0	0	0	0	0	0	0	0	0	0	0	1
	C. Stone	2001	Reducing the impact of insect herbivory in eucalypt plantations through management of extrinsic influences on tree vigour	Austral Ecology	0	0	0	1	1	0	0	0	0	0	0	1	0	0	0	1	0	0	0	0	0	0	0	0	0	0	0	0	0	0	0	1	0	0	0	1
	B. T. Sullivan, C. J. Fettig, W. J. Otrosina, M. J. Dalusky and C. W. Berisford	2003	Association between severity of prescribed burns and subsequent activity of conifer-infesting beetles in stands of longleaf pine	Forest Ecology and Management	0	0	0	1	1	0	0	0	0	0	1	0	0	0	0	0	0	0	0	0	0	0	0	0	0	0	0	0	0	0	1	0	0	0	0	1
	L. M. Thompson, K. L. Grayson and D. M. Johnson	2016	Forest edges enhance mate-finding in the invasive European gypsy moth, Lymantria dispar	Entomologia Experimentalis Et Applicata	0	0	0	1	1	0	0	0	0	0	1	0	0	0	0	0	0	0	0	0	0	1	0	0	0	0	0	0	0	0	0	0	0	0	0	1
	T. Toivanen, V. Liikanen and J. S. Kotiaho	2009	Effects of forest restoration treatments on the abundance of bark beetles in Norway spruce forests of southern Finland	Forest Ecology and Management	0	0	0	1	1	0	0	0	0	0	1	0	0	0	0	0	0	0	0	0	0	0	0	1	0	0	0	0	0	0	0	0	0	0	0	1
	E. S. Tomlin and J. H. Borden	1997	Multicomponent index for evaluating resistance by Sitka spruce to the white pine weevil (Coleoptera: Curculionidae)	Journal of Economic Entomology	0	0	0	1	1	0	0	0	0	0	0	1	0	0	0	0	0	0	0	1	0	0	0	0	0	0	0	0	0	0	0	0	0	0	1	1
	H. Vehvilainen, J. Koricheva, K. Ruohomaki, T. Johansson and S. Valkonen	2006	Effects of tree stand species composition on insect herbivory of silver birch in boreal forests	Basic and Applied Ecology	0	0	0	1	1	0	0	0	0	0	1	0	0	0	0	0	0	0	0	0	1	0	0	0	0	0	0	0	0	0	0	0	0	0	0	1
	T. O. Veteli, J. Koricheva, P. Niemela and S. Kellomaki	2006	Effects of forest management on the abundance of insect pests on Scots pine	Forest Ecology and Management	0	0	0	1	1	0	0	0	0	0	1	0	0	0	0	0	0	0	0	0	0	0	0	0	0	0	1	0	0	0	0	0	0	0	0	1
	E. M. Winford, J. T. Stevens and H. D. Safford	2015	Effects of fuel treatments on California mixed-conifer forests	California Agriculture	0	0	0	1	1	0	0	0	0	0	1	1	0	0	0	0	0	0	0	0	0	0	0	1	0	0	0	0	0	0	1	0	0	0	0	1
	V. Y. Yokoyama	2015	Olive Fruit Fly (Diptera: Tephritidae) in California Table Olives, USA: Invasion, Distribution, and Management Implications	Journal of Integrated Pest Management	0	0	0	1	1	0	0	0	0	0	1	0	0	0	0	0	0	0	0	0	0	0	0	1	0	0	0	0	0	0	0	0	1	0	0	1
	S. J. You, J. F. Liu, D. C. Huang, F. S. Ke, L. Vasseur, G. M. Gurr, S. R. Clarke, J. H. Sun, K. M. Wu and M. S. You	2013	A review of the mealybug Oracella acuta: Invasion and management in China and potential incursions into other countries	Forest Ecology and Management	0	0	0	1	1	0	0	0	0	0	1	0	0	0	0	0	0	0	0	0	0	0	0	1	0	0	0	0	0	0	0	0	1	0	0	1
	Y. Zeng, K. R. Kidd and L. G. Eckhardt	2014	The effect of thinning and clear-cut on changes in the relative abundance of root-feeding beetle ( Coleoptera: Curculionidae) in Pinus taeda plantations in central Alabama and Georgia	Pest Management Science	0	0	0	1	1	0	0	0	0	0	1	0	0	0	0	0	0	0	0	0	0	0	0	1	0	0	1	0	0	0	0	0	0	0	0	1
	R. I. Alfaro, J. N. King, R. G. Brown and S. M. Buddingh	2008	Screening of Sitka spruce genotypes for resistance to the white pine weevil using artificial infestations	Forest Ecology and Management	0	0	0	1	1	0	0	0	0	0	0	1	0	0	0	0	0	0	0	0	0	0	0	0	0	0	0	0	0	0	0	0	0	0	1	1
	R. I. Alfaro, J. N. King and L. vanAkker	2013	Delivering Sitka spruce with resistance against white pine weevil in British Columbia, Canada	Forestry Chronicle	0	0	0	1	1	0	0	0	0	0	0	1	0	0	0	0	0	0	0	0	0	0	0	0	0	0	0	0	0	0	0	0	0	0	1	1
	R. I. Alfaro, L. VanAkker, B. Jaquish and J. King	2004	Weevil resistance of progeny derived from putatively resistant and susceptible interior spruce parents	Forest Ecology and Management	0	0	0	1	1	0	0	0	0	0	0	1	0	0	0	0	0	0	0	0	0	0	0	0	0	0	0	0	0	0	0	0	0	0	1	1
	T. M. Anderson and S. Dragicevic	2016	Geospatial pest-parasitoid agent based model for optimizing biological control of forest insect infestation	Ecological Modelling	0	0	0	1	1	0	0	0	0	0	0	0	0	1	0	0	0	0	0	0	0	0	0	0	0	0	0	0	0	0	0	0	1	0	0	1
	B. Bains, F. Isik, W. B. Strong, B. Jaquish, J. A. McLean and Y. A. El-Kassaby	2009	Genetic resistance of spruce to gall-forming adelgids (Hemiptera: Adelgidae)	Canadian Journal of Forest Research-Revue Canadienne De Recherche Forestiere	0	0	0	1	1	0	0	0	0	0	0	1	0	0	0	0	0	0	0	0	0	0	0	0	0	0	0	0	0	0	0	0	0	0	1	1
	S. Bombosch and W. Dedek	1994	INTEGRATED PEST-CONTROL AGAINST IPS-TYPOGRAPHUS (L) - COMBINED USE OF PHEROMONES AND THE SYSTEMIC INSECTICIDE METHAMIDOPHOS (IPIDEX)	Zeitschrift Fur Pflanzenkrankheiten Und Pflanzenschutz-Journal of Plant Diseases and Protection	0	0	0	1	1	0	0	0	0	0	0	1	0	0	0	0	0	0	0	0	0	0	0	0	0	0	0	0	0	0	0	0	1	0	0	1
	H. H. Cebeci, R. T. Oymen and S. Acer	2010	Control of pine processionary moth, Thaumetopoea pityocampa with Bacillus thuringiensis in Antalya, Turkey	Journal of Environmental Biology	0	0	0	1	1	0	0	0	0	0	1	0	0	0	0	0	0	0	0	0	0	0	0	0	0	0	0	0	0	0	0	0	1	0	0	1
	S. R. Clarke, J. J. Riggins and F. M. Stephen	2016	Forest Management and Southern Pine Beetle Outbreaks: A Historical Perspective	Forest Science	0	0	0	1	1	0	0	0	0	0	1	1	1	1	0	0	0	0	0	0	0	0	0	0	0	0	0	0	0	0	0	0	0	0	0	1
	N. G. Collett and S. Elms	2009	The control of sirex wood wasp using biological control agents in Victoria, Australia	Agricultural and Forest Entomology	0	0	0	1	1	0	0	0	0	0	1	0	0	0	0	0	0	0	0	0	0	0	0	0	0	0	0	0	0	0	0	0	1	0	0	1
	W. R. Cooper and D. R. Horton	2017	Elicitors of Host Plant Defenses Partially Suppress Cacopsylla pyricola (Hemiptera: Psyllidae) Populations Under Field Conditions	Journal of Insect Science	0	0	0	1	1	0	0	0	0	0	0	1	0	0	0	0	0	0	0	0	0	0	0	0	0	0	0	0	0	0	0	0	1	0	0	1
	J. C. Corley, J. M. Villacide and A. M. Liebhold	2014	Can entomophagous nematodes slow the spread of invasive pest populations? The case study of Beddingia siricidicola released for the management of Sirex noctilio	Journal of Pest Science	0	0	0	1	1	0	0	0	0	0	0	0	0	1	0	0	0	0	0	0	0	0	0	0	0	0	0	0	0	0	0	0	1	0	0	1
	D. R. Coyle, E. R. Hart, J. D. McMillin, L. C. Rule and R. B. Hall	2008	Effects of repeated cottonwood leaf beetle defoliation on Populus growth and economic value over an 8-year harvest rotation	Forest Ecology and Management	0	0	0	1	1	0	0	0	0	0	0	0	1	0	0	0	0	0	0	0	0	0	0	0	0	0	0	0	0	0	0	0	1	0	1	1
	G. Z. Cui and J. J. Zhu	2016	Pheromone-Based Pest Management in China: Past, Present, and Future Prospects	Journal of Chemical Ecology	0	0	0	1	1	0	0	0	0	0	1	0	0	0	0	0	0	0	0	0	0	0	0	0	0	0	0	0	0	0	0	0	1	0	0	1
	N. Delvas, E. Bauce, C. Labbe, T. Ollevier and R. Belanger	2011	Phenolic compounds that confer resistance to spruce budworm	Entomologia Experimentalis Et Applicata	0	0	0	1	1	0	0	0	0	0	0	1	0	0	0	0	0	0	0	0	0	0	0	0	0	0	0	0	0	0	0	0	0	0	1	1
	A. B. Dillon, M. J. Downes, D. Ward and C. T. Griffin	2007	Optimizing application of entomopathogenic nematodes to manage large pine weevil, Hylobius abietis L. (Coleoptera : Curculionidae) populations developing in pine stumps, Pinus sylvestris	Biological Control	0	0	0	1	1	0	0	0	0	0	1	0	0	0	0	0	0	0	0	0	0	0	0	0	0	0	0	0	0	0	0	0	1	0	0	1
	A. B. Dillon, C. P. Moore, M. J. Downes and C. T. Griffin	2008	Evict or infect? Managing populations of the large pine weevil, Hylobius abietis, using a bottom-up and top-down approach	Forest Ecology and Management	0	0	0	1	1	0	0	0	0	0	1	0	0	0	0	0	0	0	0	0	0	0	0	0	0	0	0	0	0	0	0	0	1	0	0	1
	L. E. Ehler	1995	BIOLOGICAL-CONTROL OF OBSCURE SCALE (HOMOPTERA, DIASPIDIDAE) IN CALIFORNIA - AN EXPERIMENTAL APPROACH	Environmental Entomology	0	0	0	1	1	0	0	0	0	0	1	0	0	1	0	0	0	0	0	0	0	0	0	0	0	0	0	0	0	0	0	0	1	0	0	1
	J. Elek, N. Beveridge and N. Ramsden	1998	To Bt or not to Bt: Is a Bacillus thuringiensis-based insecticide suitable for IPM to control leaf beetles in eucalypt plantations?	Pest Management - Future Challenges, Vols 1 and 2, Proceedings	0	0	0	1	1	0	0	0	0	0	0	0	0	0	0	0	0	0	0	0	0	0	0	0	0	0	0	0	0	0	0	0	1	0	0	1
	I. Etxebeste, G. Alvarez and J. Pajares	2013	Log colonization by Ips sexdentatus prevented by increasing host unsuitability signaled by verbenone	Entomologia Experimentalis Et Applicata	0	0	0	1	1	0	0	0	0	0	1	0	0	0	0	0	0	0	0	0	0	0	0	0	0	0	0	0	0	0	0	0	1	0	0	1
	H. F. Evans and C. Brit Crop Protect	1997	The role of microbial insecticides in forest pest management	Microbial Insecticides: Novelty or Necessity?	0	0	0	1	1	0	0	0	0	0	0	0	0	0	0	0	0	0	0	0	0	0	0	0	0	0	0	0	0	0	0	0	1	0	0	1
	H. F. Evans and N. J. Fielding	1994	INTEGRATED MANAGEMENT OF DENDROCTONUS-MICANS IN THE UK	Forest Ecology and Management	0	0	0	1	1	0	0	0	0	0	1	0	0	0	0	0	0	0	0	0	0	0	0	0	0	0	0	0	0	0	0	0	1	0	0	1
	H. F. Evans and N. J. Fielding	1996	Restoring the natural balance: Biological control of Dendroctonus micans in Great Britain	Biological Control Introductions - Opportunities for Improved Crop Production	0	0	0	1	1	0	0	0	0	0	1	0	0	0	0	0	0	0	0	0	0	0	0	0	0	0	0	0	0	0	0	0	1	0	0	1
	F. Fedderwitz, G. Nordlander, V. Ninkovic and N. Bjorklund	2016	Effects of jasmonate-induced resistance in conifer plants on the feeding behaviour of a bark-chewing insect, Hylobius abietis	Journal of Pest Science	0	0	0	1	1	0	0	0	0	0	0	1	0	0	0	0	0	0	0	0	0	0	0	0	0	0	0	0	0	0	0	0	1	0	0	1
	C. J. Fettig, S. R. McKelvey, C. P. Dabney and D. P. W. Huber	2012	Responses of Dendroctonus brevicomis (Coleoptera: Curculionidae) in Behavioral Assays: Implications to Development of a Semiochemical-Based Tool for Tree Protection	Journal of Economic Entomology	0	0	0	1	1	0	0	0	0	0	0	1	0	0	0	0	0	0	0	0	0	0	0	0	0	0	0	0	0	0	0	0	1	0	0	1
	D. Fischbein and J. C. Corley	2015	Classical biological control of an invasive forest pest: a world perspective of the management of Sirex noctilio using the parasitoid Ibalia leucospoides (Hymenoptera: Ibaliidae)	Bulletin of Entomological Research	0	0	0	1	1	0	0	0	0	0	0	0	0	1	0	0	0	0	0	0	0	0	0	0	0	0	0	0	0	0	0	0	1	0	0	1
	R. A. Fleming and C. A. Shoemaker	1992	EVALUATING MODELS FOR SPRUCE BUDWORM FOREST MANAGEMENT - COMPARING OUTPUT WITH REGIONAL FIELD DATA	Ecological Applications	0	0	0	1	1	0	0	0	0	0	1	0	0	0	0	0	0	0	0	0	0	0	0	0	0	0	0	0	0	0	0	0	1	0	0	1
	D. Foque, P. Braekman, J. G. Pieters and D. Nuyttens	2012	A vertical spray boom application technique for conical bay laurel (Laurus nobilis) plants	Crop Protection	0	0	0	1	1	0	0	0	0	0	1	0	0	0	0	0	0	0	0	0	0	0	0	0	0	0	0	0	0	0	0	0	1	0	0	1
	A. Fourie	2011	Preliminary attempts to identify pathogens as biological control agents against Cestrum species (Solanaceae) in South Africa	African Entomology	0	0	0	1	1	0	0	0	0	0	1	0	0	0	0	0	0	0	0	0	0	0	0	0	0	0	0	0	0	0	0	0	1	0	0	1
	M. Franjevic, T. Porsinsky and A. Duka	2016	Integrated Oak Timber Protection from Ambrosia Bark Beetles: Economic and Ecological Importance in Harvesting Operations	Croatian Journal of Forest Engineering	0	0	0	1	1	0	0	0	0	0	1	0	0	0	0	0	0	0	0	0	0	0	0	0	0	0	0	0	0	0	0	0	1	0	0	1
	N. E. Gillette, N. Erbilgin, J. N. Webster, L. Pederson, S. R. Mori, J. D. Stein, D. R. Owen, K. M. Bischel and D. L. Wood	2009	Aerially applied verbenone-releasing laminated flakes protect Pinus contorta stands from attack by Dendroctonus ponderosae in California and Idaho	Forest Ecology and Management	0	0	0	1	1	0	0	0	0	0	1	0	0	0	0	0	0	0	0	0	0	0	0	0	0	0	0	0	0	0	0	0	1	0	0	1
	R. K. Gupta, M. Gani, V. Kaul, R. M. Bhagat, K. Bali and R. K. Samnotra	2016	Field evaluation of Lymantria obfuscata multiple nucleopolyhedrovirus for the management of Indian gypsy moth in Jammu & Kashmir, India	Crop Protection	0	0	0	1	1	0	0	0	0	0	1	0	0	0	0	0	0	0	0	0	0	0	0	0	0	0	0	0	0	0	0	0	1	0	0	1
	L. J. Haavik, K. J. Dodds, K. Ryan and J. D. Allison	2016	Evidence that the availability of suitable pine limits non-native Sirex noctilio in Ontario	Agricultural and Forest Entomology	0	0	0	1	1	0	0	0	0	0	1	0	0	0	0	0	0	0	0	0	0	0	0	0	0	0	0	0	0	0	0	0	1	0	0	1
	A. E. Hajek and R. E. Webb	1999	Inoculative augmentation of the fungal entomopathogen Entomophaga maimaiga as a homeowner tactic to control gypsy moth (Lepidoptera : Lymantriidae)	Biological Control	0	0	0	1	1	0	0	0	0	0	1	0	0	0	0	0	0	0	0	0	0	0	0	0	0	0	0	0	0	0	0	0	1	0	0	1
	L. M. Hanks, J. G. Millar, T. D. Paine and C. D. Campbell	2000	Classical biological control of the Australian weevil Gonipterus scutellatus (Coleoptera : Curculionidae) in California	Environmental Entomology	0	0	0	1	1	0	0	0	0	0	1	0	0	0	0	0	0	0	0	0	0	0	0	0	0	0	0	0	0	0	0	0	1	0	0	1
	E. R. Hannon, N. T. Kittelson, J. A. Eaton and J. J. Brown	2008	Screening hybrid poplar clones for susceptibility to Cryptorhynchus lapathi (Coleoptera : Curculionidae)	Journal of Economic Entomology	0	0	0	1	1	0	0	0	0	0	0	1	0	0	0	0	0	0	0	0	0	0	0	0	0	0	0	0	0	0	0	0	0	0	1	1
	B. Helson, B. Lyons and P. de Groot	1999	Evaluation of neem EC formulations containing azadirachtin for forest insect pest management in Canada	Azadirachta Indica a. Juss.	0	0	0	1	1	0	0	0	0	0	0	0	0	0	0	0	0	0	0	0	0	0	0	0	0	0	0	0	0	0	0	0	1	0	0	1
	B. J. Hicks	2016	Optimization of Beauveria bassiana in a spray formulation against Choristoneura fumiferana	Canadian Journal of Forest Research	0	0	0	1	1	0	0	0	0	0	1	0	0	0	0	0	0	0	0	0	0	0	0	0	0	0	0	0	0	0	0	0	1	0	0	1
	J. Hof, M. Bevers and B. Kent	1997	An optimization approach to area-based forest pest management over time and space	Forest Science	0	0	0	1	1	0	0	0	0	0	0	0	0	0	0	0	0	0	0	0	0	0	0	0	0	0	0	0	0	0	0	0	0	0	0	1
	E. T. Iede and R. Zanetti	2007	Occurrence and management recommendations of Sirex noctilio Fabricius (Hymenoptera, Siricidae) on Pinus patula (Pinaceae) plantations in the state of Minas Gerais, Brazil	Revista Brasileira De Entomologia	0	0	0	1	1	0	0	0	0	0	0	0	0	1	0	0	0	0	0	0	0	0	0	0	0	0	0	0	0	0	0	0	0	0	0	1
	R. R. James, B. A. Croft and S. H. Strauss	1999	Susceptibility of the cottonwood leaf beetle (Coleoptera : Chrysomelidae) to different strains and transgenic toxins of Bacillus thuringiensis	Environmental Entomology	0	0	0	1	1	0	0	0	0	0	0	1	0	0	0	0	0	0	0	0	0	0	0	0	0	0	0	0	0	0	0	0	1	0	0	1
	A. R. Kalischuk, L. A. Gom, K. D. Floate and S. B. Rood	1997	Intersectional cottonwood hybrids are particularly susceptible to the poplar bud gall mite	Canadian Journal of Botany-Revue Canadienne De Botanique	0	0	0	1	1	0	0	0	0	0	0	1	0	0	0	0	0	0	0	0	0	0	0	0	0	0	0	0	0	0	0	0	0	0	1	1
	R. Karimzadeh and S. Iranipour	2017	Spatial Distribution and Site-Specific Spraying of Main Sucking Pests of Elm Trees	Neotropical Entomology	0	0	0	1	1	0	0	0	0	0	1	0	0	0	0	0	0	0	0	0	0	0	0	0	0	0	0	0	0	0	0	0	1	0	0	1
	A. M. Kelley and J. S. King	2014	Pest pressure, hurricanes, and genotype interact to strongly impact stem form in young loblolly pine (Pinus taeda L.) along the coastal plain of North Carolina	Trees-Structure and Function	0	0	0	1	1	0	0	0	0	0	0	1	0	0	0	0	0	0	0	0	0	0	0	0	0	0	0	0	0	0	0	0	1	0	0	1
	S. Kiruba, S. S. M. Das, J. J. Latha, I. S. Stalin and S. Papadopoulou	2011	Efficacy of Biosmoke Fumigation in the Management of the Red Flour Beetle Tribolium castaneum (Coleoptera: Tenebrionidae)	Entomologia Generalis	0	0	0	1	1	0	0	0	0	0	1	0	0	0	0	0	0	0	0	0	0	0	0	0	0	0	0	0	0	0	0	0	1	0	0	1
	A. L. Klocko, R. Meilan, R. R. James, V. Viswanath, C. Ma, P. Payne, L. Miller, J. S. Skinner, B. Oppert, G. A. Cardineau and S. H. Strauss	2014	Bt-Cry3Aa transgene expression reduces insect damage and improves growth in field-grown hybrid poplar	Canadian Journal of Forest Research-Revue Canadienne De Recherche Forestiere	0	0	0	1	1	0	0	0	0	0	0	1	0	0	0	0	0	0	0	0	0	0	0	0	0	0	0	0	0	0	0	0	0	0	1	1
	A. L. Knight, T. R. Unruh, B. A. Christianson, G. J. Puterka and D. M. Glenn	2000	Effects of a kaolin-based particle film on obliquebanded leafroller (Lepidoptera : Tortricidae)	Journal of Economic Entomology	0	0	0	1	1	0	0	0	0	0	1	0	0	0	0	0	0	0	0	0	0	0	0	0	0	0	0	0	0	0	0	0	1	0	0	1
	J. L. Koch, D. W. Carey, M. E. Mason and C. D. Nelson	2010	Assessment of beech scale resistance in full- and half-sibling American beech families	Canadian Journal of Forest Research-Revue Canadienne De Recherche Forestiere	0	0	0	1	1	0	0	0	0	0	0	1	0	0	0	0	0	0	0	0	0	0	0	0	0	0	0	0	0	0	0	0	0	0	1	1
	D. B. Lyons, R. Lavallee, G. Kyei-Poku, K. Van Frankenhuyzen, S. Johny, C. Guertin, J. A. Francese, G. C. Jones and M. Blais	2012	Towards the Development of an Autocontamination Trap System to Manage Populations of Emerald Ash Borer (Coleoptera: Buprestidae) With the Native Entomopathogenic Fungus, Beauveria bassiana	Journal of Economic Entomology	0	0	0	1	1	0	0	0	0	0	1	0	0	0	0	0	0	0	0	0	0	0	0	0	0	0	0	0	0	0	0	0	1	0	0	1
	G. F. McLaren, J. A. Fraser and D. M. Suckling	1998	Mating disruption for the control of loaf rollers on apricots	New Zealand Journal of Crop and Horticultural Science	0	0	0	1	1	0	0	0	0	0	1	0	0	0	0	0	0	0	0	0	0	0	0	0	0	0	0	0	0	0	0	0	1	0	0	1
	J. M. Meyers, F. M. Stephen, L. J. Haavik and D. C. Steinkraus	2013	Laboratory and field bioassays on the effects of Beauveria bassiana Vuillemin (Hypocreales: Cordycipitaceae) on red oak borer, Enaphalodes rufulus (Haldeman) (Coleoptera: Cerambycidae)	Biological Control	0	0	0	1	1	0	0	0	0	0	1	0	0	0	0	0	0	0	0	0	0	0	0	0	0	0	0	0	0	0	0	0	1	0	0	1
	M. Michelozzi	1999	Defensive roles of terpenoid mixtures in conifers	Acta Botanica Gallica	0	0	0	1	1	0	0	0	0	0	0	1	0	0	0	0	0	0	0	0	0	0	0	0	0	0	0	0	0	0	0	0	0	0	1	1
	M. Monobrullah	2003	Optical brighteners - Pathogenicity enhancers of entomopathogenic viruses	Current Science	0	0	0	1	1	0	0	0	0	0	1	0	0	0	0	0	0	0	0	0	0	0	0	0	0	0	0	0	0	0	0	0	1	0	0	1
	L. B. Monteiro, A. Souza and J. Argenton	2013	MATING DISRUPTION WITH LOW DENSITY DIFFUSERS FOR THE MANAGEMENT OF ORIENTAL FRUIT MOTHS (LEPIDOPTERA: TORTRICIDAE) IN APPLE ORCHARDS UNDER SUBTROPICAL CLIMATE IN SOUTHERN BRAZIL	Revista Brasileira De Fruticultura	0	0	0	1	1	0	0	0	0	0	1	0	0	0	0	0	0	0	0	0	0	0	0	0	0	0	0	0	0	0	0	0	1	0	0	1
	F. M. Nuvoloni, E. B. de Castro and R. J. F. Feres	2014	The role of native vegetation on infection rates of Calacarus heveae (Acari: Eriophyidae) by Hirsutella thompsonii (Ascomycota: Ophiocordycipitaceae)	Experimental and Applied Acarology	0	0	0	1	1	0	0	0	0	0	1	0	0	0	0	0	0	0	0	0	0	0	0	0	0	0	0	0	0	0	0	0	1	0	0	1
	J. B. Oliver, C. M. Ranger, M. E. Reding, J. J. Moyseenko, N. N. Youssef and A. M. Bray	2013	Preharvest Quarantine Treatments of Chlorantraniliprole, Clothianidin, and Imidacloprid-Based Insecticides for Control of Japanese Beetle (Coleoptera: Scarabaeidae) and Other Scarab Larvae in the Root Zone of Field-Grown Nursery Trees	Journal of Economic Entomology	0	0	0	1	1	0	0	0	0	0	1	0	0	0	0	0	0	0	0	0	0	0	0	0	0	0	0	0	0	0	0	0	1	0	0	1
	J. A. Pajares, G. Alvarez, D. R. Hall, N. Ibarra, G. Hoch, P. Halbig, D. Cocos, H. Johansson and M. Schroeder	2017	Attractants for management of the pine sawyer beetle Monochamus sutor, a potential vector of Bursaphelenchus xylophilus	Journal of Applied Entomology	0	0	0	1	1	0	0	0	0	0	1	0	0	0	0	0	0	0	0	0	0	0	0	0	0	0	0	0	0	0	0	0	1	0	0	1
	B. L. Parker, M. Skinner, M. Brownbridge, A. Adamowicz and F. C. Su	1995	Entomopathogenic fungi for thrips management: Recent advances	International Symposium on Tospoviruses and Thrips of Floral and Vegetable Crops	0	0	0	1	1	0	0	0	0	0	1	0	0	0	0	0	0	0	0	0	0	0	0	0	0	0	0	0	0	0	0	0	1	0	0	1
	G. C. Percival and S. P. Holmes	2016	The influence of systemic inducing agents on horse chestnut leaf miner (Cameraria ohridella) severity in white flowering horse chestnut (Aesculus hoppicastanum L.)	Urban Forestry & Urban Greening	0	0	0	1	1	0	0	0	0	0	0	1	0	0	0	0	0	0	0	0	0	0	0	0	0	0	0	0	0	0	0	0	1	0	0	1
	M. A. Poisson, R. Ahumada, A. O. Angulo, F. Munoz and E. Sanfuentes	2016	Mega-trap-plots: a novel method of Sirex woodwasp management on Pinus radiata plantations in Chile	Southern Forests	0	0	0	1	1	0	0	0	0	0	1	0	0	0	0	0	0	0	0	0	0	0	0	0	0	0	0	0	0	0	0	0	1	0	0	1
	V. Popa, E. Deziel, R. Lavallee, E. Bauce and C. Guertin	2012	The complex symbiotic relationships of bark beetles with microorganisms: a potential practical approach for biological control in forestry	Pest Management Science	0	0	0	1	1	0	0	0	0	0	1	0	0	0	0	0	0	0	0	0	0	0	0	0	0	0	0	0	0	0	0	0	1	0	0	1
	D. Poullot, D. Beslay, J. C. Bouvier and B. Sauphanor	2001	Is attract-and-kill technology potent against insecticide-resistant Lepidoptera?	Pest Management Science	0	0	0	1	1	0	0	0	0	0	1	0	0	0	0	0	0	0	0	0	0	0	0	0	0	0	0	0	0	0	0	0	1	0	0	1
	D. J. Pree, L. A. Bittner and K. J. Whitty	2000	Field bioassay methodologies for the detection of resistance to acaricides in populations of European red mite (Acari : Tetranychidae)	Canadian Entomologist	0	0	0	1	1	0	0	0	0	0	1	0	0	0	0	0	0	0	0	0	0	0	0	0	0	0	0	0	0	0	0	0	1	0	0	1
	R. A. Progar, N. Sturdevant and M. J. Rinella	2010	Trapping Douglas-fir beetle (Dendroctonus pseudotsugue) with pheromone baited multiple-funnel traps does not reduce Douglas-fir (Pseudotsuga menziesii) mortality	Pan-Pacific Entomologist	0	0	0	1	1	0	0	0	0	0	1	0	0	0	0	0	0	0	0	0	0	0	0	0	0	0	0	0	0	0	0	0	1	0	0	1
	Y. C. Pu, T. L. Ma, Y. M. Hou and M. Sun	2017	An entomopathogenic bacterium strain, Bacillus thuringiensis, as a biological control agent against the red palm weevil, Rhynchophorus ferrugineus (Coleoptera: Curculionidae)	Pest Management Science	0	0	0	1	1	0	0	0	0	0	1	0	0	0	0	0	0	0	0	0	0	0	0	0	0	0	0	0	0	0	0	0	1	0	0	1
	D. S. Pureswaran and T. M. Poland	2009	Host Selection and Feeding Preference of Agrilus planipennis (Coleoptera: Buprestidae) on Ash (Fraxinus spp.)	Environmental Entomology	0	0	0	1	1	0	0	0	0	0	0	1	0	0	0	0	0	0	0	0	0	0	0	0	0	0	0	0	0	0	0	0	0	0	1	1
	D. Quiring	1996	Mechanisms of resistance of white spruce to the spruce bud moth	Forestry Chronicle	0	0	0	1	1	0	0	0	0	0	0	1	0	0	0	0	0	0	0	0	0	0	0	0	0	0	0	0	0	0	0	0	1	0	0	1
	R. C. Reardon	1991	APPALACHIAN GYPSY-MOTH INTEGRATED PEST-MANAGEMENT PROJECT	Forest Ecology and Management	0	0	0	1	1	0	0	0	0	0	0	0	0	0	0	0	0	0	0	0	0	0	0	0	0	0	0	0	0	0	0	0	0	0	0	1
	W. Reid	1999	Biological pest suppression in native pecan groves	Biological Control of Native or Indigenous Insect Pests: Challenges, Constraints and Potential	0	0	0	1	1	0	0	0	0	0	0	0	0	0	0	0	0	0	0	0	0	0	0	0	0	0	0	0	0	0	0	0	0	0	0	1
	D. J. Robison and K. F. Raffa	1998	Productivity, drought tolerance and pest status of hybrid Populus: Tree improvement and silvicultural implications	Biomass & Bioenergy	0	0	0	1	1	0	0	0	0	0	0	1	0	0	0	0	0	0	0	0	0	0	0	0	0	0	0	0	0	0	0	0	0	0	1	1
	M. C. Saavedra, T. M. Withers and G. I. Holwell	2015	Susceptibility of four Eucalyptus host species for the development of Thaumastocoris peregrinus Carpintero and Dellape (Hemiptera: Thaumastocoridae)	Forest Ecology and Management	0	0	0	1	1	0	0	0	0	0	0	1	0	0	0	0	0	0	0	0	0	0	0	0	0	0	0	0	0	0	0	0	0	0	1	1
	L. A. Sagarra and D. D. Peterkin	1999	Invasion of the Caribbean by the hibiscus mealybug, Maconellicoccus hirsutus Green Homoptera : Pseudococcidae	Phytoprotection	0	0	0	1	1	0	0	0	0	0	1	0	0	0	0	0	0	0	0	0	0	0	0	0	0	0	0	0	0	0	0	0	1	0	0	1
	E. Sanchez-Husillos, I. Etxebeste and J. Pajares	2015	Effectiveness of mass trapping in the reduction of Monochamus galloprovincialis Olivier (Col.: Cerambycidae) populations	Journal of Applied Entomology	0	0	0	1	1	0	0	0	0	0	1	0	0	0	0	0	0	0	0	0	0	0	0	0	0	0	0	0	0	0	0	0	1	0	0	1
	D. Schmera and P. M. Guerin	2012	Plant volatile compounds shorten reaction time and enhance attraction of the codling moth (Cydia pomonella) to codlemone	Pest Management Science	0	0	0	1	1	0	0	0	0	0	1	0	0	0	0	0	0	0	0	0	0	0	0	0	0	0	0	0	0	0	0	0	1	0	0	1
	B. L. Seagraves, C. T. Redmond and D. A. Potter	2013	Relative resistance or susceptibility of maple (Acer) species, hybrids and cultivars to six arthropod pests of production nurseries	Pest Management Science	0	0	0	1	1	0	0	0	0	0	0	1	0	0	0	0	0	0	0	0	0	0	0	0	0	0	0	0	0	0	0	0	0	0	1	1
	D. I. Shapiro-Ilan, W. A. Gardner, L. Wells, T. E. Cottrell, R. W. Behle and B. W. Wood	2013	Effects of Entomopathogenic Fungus Species, and Impact of Fertilizers, on Biological Control of Pecan Weevil (Coleoptera: Curculionidae)	Environmental Entomology	0	0	0	1	1	0	0	0	0	0	1	0	0	0	0	0	0	0	0	0	0	0	0	0	0	0	0	0	0	0	0	0	1	0	0	1
	A. A. Sharov, D. Leonard, A. M. Liebhold, E. A. Roberts and W. Dickerson	2002	Slow the Spread: A national program to contain the gypsy moth	Journal of Forestry	0	0	0	1	1	0	0	0	0	0	0	0	0	1	0	0	0	0	0	0	0	0	0	0	0	0	0	0	0	0	0	0	1	0	0	1
	S. Simoni, R. Cantini, M. Castagnoli and A. Battisti	2004	Impact and management of the eriophyoid mite Trisetacus juniperinus on the evergreen cypress Cupressus sempervirens	Agricultural and Forest Entomology	0	0	0	1	1	0	0	0	0	0	0	1	0	0	0	0	0	0	0	0	0	0	0	0	0	0	0	0	0	0	0	0	1	0	1	1
	M. Tabakovic-Tosic, M. Koprivica, D. Tosic and V. Golubovic-Curguz	2011	Biological efficacy of the ecotoxically favourable insecticides and their mixture in the control of gypsy moth	African Journal of Biotechnology	0	0	0	1	1	0	0	0	0	0	1	0	0	0	0	0	0	0	0	0	0	0	0	0	0	0	0	0	0	0	0	0	1	0	0	1
	K. S. Tcheslavskaia, K. W. Thorpe, C. C. Brewster, A. A. Sharov, D. S. Leonard, R. C. Reardon, V. C. Mastro, P. Sellers and E. A. Roberts	2005	Optimization of pheromone dosage for gypsy moth mating disruption	Entomologia Experimentalis Et Applicata	0	0	0	1	1	0	0	0	0	0	1	0	0	0	0	0	0	0	0	0	0	0	0	0	0	0	0	0	0	0	0	0	1	0	0	1
	T. R. Torgersen	2001	Defoliators in eastern Oregon and Washington	Northwest Science	0	0	0	1	1	0	0	0	0	0	1	0	0	0	0	0	0	0	0	0	0	0	0	0	0	0	0	0	0	0	0	0	1	0	0	1
	P. Torr, S. Heritage and M. J. Wilson	2007	Steinemema kraussei, an indigenous nematode found in coniferous forests: efficacy and field persistence against Hylobius abietis	Agricultural and Forest Entomology	0	0	0	1	1	0	0	0	0	0	1	0	0	0	0	0	0	0	0	0	0	0	0	0	0	0	0	0	0	0	0	0	1	0	0	1
	L. M. Torres-Vila, A. Sanchez-Gonzalez, J. Merino-Martinez, F. Ponce-Escudero, Y. Conejo-Rodriguez, D. Martin-Vertedor and J. J. Ferrero-Garcia	2013	Mark-recapture of Cerambyx welensii in dehesa woodlands: dispersal behaviour, population density, and mass trapping efficiency with low trap densities	Entomologia Experimentalis Et Applicata	0	0	0	1	1	0	0	0	0	0	1	0	0	0	0	0	0	0	0	0	0	0	0	0	0	0	0	0	0	0	0	0	1	0	0	1
	J. P. Vite and E. Baader	1990	PRESENT AND FUTURE USE OF SEMIOCHEMICALS IN PEST-MANAGEMENT OF BARK BEETLES	Journal of Chemical Ecology	0	0	0	1	1	0	0	0	0	0	1	0	0	0	0	0	0	0	0	0	0	0	0	0	0	0	0	0	0	0	0	0	1	0	0	1
	N. T. Vu, R. Eastwood and D. Burckhardt	2012	Life history, damage assessment and control of Trioza hopeae (Hemiptera: Psylloidea), a serious pest on Hopea odorata (Malvales: Dipterocarpaceae) in Vietnam	Entomological Research	0	0	0	1	1	0	0	0	0	0	1	0	0	0	0	0	0	0	0	0	0	0	0	0	0	0	0	0	0	0	0	0	1	0	0	1
	Y. C. Wang, P. Li and D. F. Chi	2017	Electrophysiological and laboratory behavioral responses of a leaf beetle pest of elm, Ambrostoma quadriimpressum, to selected plant volatiles and essential oils	Entomologia Experimentalis Et Applicata	0	0	0	1	1	0	0	0	0	0	1	0	0	0	0	0	0	0	0	0	0	0	0	0	0	0	0	0	0	0	0	0	1	0	0	1
	R. E. Webb, G. B. White, T. Sukontarak, J. D. Podgwaite, D. Schumacher, A. Diss and R. C. Reardon	2004	Biological efficacy of Gypchek against a low-density leading-edge gypsy moth population	Northern Journal of Applied Forestry	0	0	0	1	1	0	0	0	0	0	1	0	0	0	0	0	0	0	0	0	0	0	0	0	0	0	0	0	0	0	0	0	1	0	0	1
	C. T. Werle, K. M. Addesso, B. J. Sampson, J. B. Oliver and J. J. Adamczyk	2017	Integrating Kaolin Clay for Ambrosia Beetle Management in Ornamental Crops of Eastern Redbud	Hortscience	0	0	0	1	1	0	0	0	0	0	1	0	0	0	0	0	0	0	0	0	0	0	0	0	0	0	0	0	0	0	0	0	1	0	0	1
	T. Yamanaka, M. Teshiba, M. Tuda and T. Tsutsumi	2011	Possible use of synthetic aggregation pheromones to control stinkbug Plautia stali in kaki persimmon orchards	Agricultural and Forest Entomology	0	0	0	1	1	0	0	0	0	0	1	0	0	0	0	0	0	0	0	0	0	0	0	0	0	0	0	0	0	0	0	0	1	0	0	1
	R. Zas, L. Sampedro, E. Prada, M. J. Lombardero and J. Fernandez-Lopez	2006	Fertilization increases Hylobius abietis L. damage in Pinus pinaster Ait. seedlings	Forest Ecology and Management	0	0	0	1	1	0	0	0	0	0	1	0	0	0	0	0	0	0	0	0	0	0	0	0	0	0	0	0	0	0	0	0	1	0	0	1
	T. Zhao, P. Krokene, J. Hu, E. Christiansen, N. Bjorklund, B. Langstrom, H. Solheim and A. K. Borg-Karlson	2011	Induced Terpene Accumulation in Norway Spruce Inhibits Bark Beetle Colonization in a Dose-Dependent Manner	Plos One	0	0	0	1	1	0	0	0	0	0	1	0	0	0	0	0	0	0	0	0	0	0	0	0	0	0	0	0	0	0	0	0	1	0	0	1
	G. Schroth, U. Krauss, L. Gasparotto, J. A. D. Aguilar and K. Vohland	2000	Pests and diseases in agroforestry systems of the humid tropics	Agroforestry Systems	0	0	0	0	1	0	1	0	0	0	0	1	0	0	0	0	0	0	0	0	1	0	0	0	0	0	1	0	0	0	0	0	0	0	0	1
	R. D. Burdon	2001	Genetic diversity and disease resistance: some considerations for research, breeding, and deployment	Canadian Journal of Forest Research-Revue Canadienne De Recherche Forestiere	0	0	0	0	0	0	1	0	0	0	0	1	0	0	0	0	0	0	0	0	0	0	0	0	0	0	0	0	0	0	0	0	0	0	1	1
	A. Gafur, A. Nasution, M. Yuliarto, W. C. Yong and M. Sharma	2015	A new screening method for Ganoderma philippii tolerance in tropical Acacia species	Southern Forests	0	0	0	0	0	0	1	0	0	0	0	1	0	0	0	0	0	0	0	0	0	0	0	0	0	0	0	0	0	0	0	0	0	0	1	1
	C. G. Abreu, L. Carvalho, M. J. Gaspar, A. L. Gomes, J. Colaco and A. O. Cardoso	1999	Assessment of resistance to chestnut ink disease	Second International Symposium on Chestnut	0	0	0	0	0	0	0	1	0	0	0	1	0	0	0	0	0	0	0	0	0	0	0	0	0	0	0	0	0	0	0	0	0	0	1	1
	O. A. Akinsanmi and A. Drenth	2013	Phosphite and metalaxyl rejuvenate macadamia trees in decline caused by Phytophthora cinnamomi	Crop Protection	0	0	0	0	0	0	0	1	0	0	0	0	1	0	0	0	0	0	0	0	0	0	0	0	0	0	0	0	0	0	0	0	1	0	0	1
	O. A. Akinsanmi and A. Drenth	2016	Soil health management is a precursor to sustainable control of Phytophthora in macadamia	Xxix International Horticultural Congress on Horticulture: Sustaining Lives, Livelihoods and Landscapes	0	0	0	0	0	0	0	1	0	0	0	1	0	0	0	0	0	0	0	0	0	0	0	0	0	0	0	0	0	0	0	0	1	1	1	1
	Y. C. Chang	1991	INTEGRATED PEST-MANAGEMENT OF SEVERAL FOREST DEFOLIATORS IN TAIWAN	Forest Ecology and Management	0	0	0	0	1	0	0	0	0	0	1	1	0	0	0	0	0	0	0	0	1	0	0	0	0	0	0	0	0	0	0	0	1	0	0	1
	B. Harz and W. Topp	1999	Deadwood in commercial forest: a source of danger for the outbreak of pest species?	Forstwissenschaftliches Centralblatt	0	0	0	0	1	0	0	0	0	0	1	0	0	0	0	0	0	0	0	0	0	0	0	1	0	0	0	0	0	0	0	0	0	0	0	1
	J. S. Alao, F. A. Sale and A. S. Ojo	2011	Problems and management of insect pests in social forestry in Nigeria	African Journal of Agricultural Research	0	0	0	0	1	0	0	0	0	0	0	0	0	0	0	0	0	0	0	0	0	0	0	0	0	0	0	0	0	0	0	0	0	0	0	1
	T. Brabbs, D. Collins, F. Herard, M. Maspero and D. Eyre	2015	Prospects for the use of biological control agents against Anoplophora in Europe	Pest Management Science	0	0	0	0	1	0	0	0	0	0	0	1	0	1	0	0	0	0	0	0	0	0	0	0	0	0	0	0	0	0	0	0	1	0	0	1
	J. J. Brown, N. T. Kittelson, E. R. Hannon and D. B. Walsh	2006	An endemic population of western poplar clearwing moths (Lepidoptera : Sesiidae) invades a monoculture of hybrid poplar	Journal of Economic Entomology	0	0	0	0	1	0	0	0	0	0	0	1	0	0	0	0	0	0	0	0	0	0	0	0	0	0	0	0	0	0	0	0	1	0	1	1
	H. A. D. da Silva, M. R. Vieira, W. V. Valerio, M. D. M. Cardoso and J. C. Figueira	2011	Rubber tree clones with resistance to mites	Bragantia	0	0	0	0	1	0	0	0	0	0	0	1	0	0	0	0	0	0	0	0	0	0	0	0	0	0	0	0	0	0	0	0	0	0	1	1
	R. L. Deal	2000	The possibility of using new silvicultural systems in hemlock-spruce stands in Southeast Alaska: A retrospective perspective	Proceedings: Linking Healthy Forests and Communities through Alaska Value-Added Forest Products	0	0	0	0	0	0	0	0	0	0	0	0	0	0	0	0	0	0	0	0	0	0	0	0	0	0	0	0	0	0	0	0	0	0	0	1
	G. A. A. Elbadri, D. W. Lee, J. C. Park, H. Bin Yn, H. Y. Choo, S. M. Lee and T. H. Lim	2008	Nematocidal screening of essential oils and herbal extracts against Bursaphelenchus xylophilus	Plant Pathology Journal	0	0	0	0	0	0	0	0	0	0	0	0	0	0	0	0	0	0	0	0	0	0	0	0	0	0	0	0	0	0	0	0	0	0	0	1
	E. Fuhrer	1996	Entomological aspects regarding the conversion of montane spruce forests in Central Europe	Entomologia Generalis	0	0	0	0	0	0	0	0	0	0	0	0	0	0	0	0	0	0	0	0	0	0	0	0	0	0	0	0	0	0	0	0	0	0	0	1
	N. Hess, C. Dancak, F. Harris, R. Couch and Saf	1997	Forest health through land management planning	Meeting in the Middle, Proceedings	0	0	0	0	0	0	0	0	0	0	0	0	0	0	0	0	0	0	0	0	0	0	0	0	0	0	0	0	0	0	0	0	0	0	0	1
	S. A. Lopes, G. F. Frare, P. T. Yamamoto, A. J. Ayres and J. C. Barbosa	2007	Ineffectiveness of pruning to control citrus huanglongbing caused by Candidatus Liberibacter americanus	European Journal of Plant Pathology	0	0	0	0	0	0	0	0	0	0	0	0	0	0	0	0	0	0	0	0	0	0	0	0	0	0	0	0	0	0	0	0	0	0	0	1
	G. B. MacDonald	1996	The emergence of boreal mixedwood management in Ontario: Background and prospects	Advancing Boreal Mixedwood Management in Ontario: Proceedings of a Workshop	0	0	0	0	0	0	0	0	0	0	0	0	0	0	0	0	0	0	0	0	0	0	0	0	0	0	0	0	0	0	0	0	0	0	0	1
	M. F. Mahalovich and Saf	1996	Forest health as affected by genetic and silvicultural practices	Proceedings of the 1996 Society of American Foresters Convention: Diverse Forests, Abundant Opportunities, and Evolving Realities	0	0	0	0	0	0	0	0	0	0	0	0	0	0	0	0	0	0	0	0	0	0	0	0	0	0	0	0	0	0	0	0	0	0	0	1
	C. Mohanan	2000	Status of forest nursery diseases in India and emerging trends in seedling disease management	Proceedings of the 4th Meeting of Iufro Working Party 7.03.04 - Disease and Insects in Forest Nurseries	0	0	0	0	0	0	0	0	0	0	0	0	0	0	0	0	0	0	0	0	0	0	0	0	0	0	0	0	0	0	0	0	0	0	0	1
	O. Murillo-Gamboa, A. Salas-Rodriguez, R. Murillo-Cruz and C. Avila-Arias	2016	Rot log advance rate in melina Gmelina arborea Roxb. and management possibilities	Revista Forestal Mesoamerica Kuru-Rfmk	0	0	0	0	0	0	0	0	0	0	0	0	0	0	0	0	0	0	0	0	0	0	0	0	0	0	0	0	0	0	0	0	0	0	0	1
	M. S. Osman	1997	Petroleum oils as a component of integrated pest management of phytophagous mites	Arab Gulf Journal of Scientific Research	0	0	0	0	1	0	0	0	0	0	0	0	0	0	0	0	0	0	0	0	0	0	0	0	0	0	0	0	0	0	0	0	1	0	0	1
	M. E. Ostry, L. M. Haugen, J. G. O'Brien and Saf	1999	Disease risk to uneven-aged red pine	Great Lakes, Great Forests, Proceedings	0	0	0	0	0	0	0	0	0	0	0	0	0	0	0	0	0	0	0	0	0	0	0	0	0	0	0	0	0	0	0	0	0	0	0	1
	T. D. Paine and J. G. Millar	2005	Invasion biology and management of insects feeding on eucalyptus in California	Entomological Research in Mediterranean Forest Ecosystems	0	0	0	0	1	0	0	0	0	0	0	0	0	0	0	0	0	0	0	0	0	0	0	0	0	0	0	0	0	0	0	0	0	0	0	1
	A. Sterling, C. A. Gomez and A. A. Campo	2011	Pathogenicity of Metarhizium anisopliae (Deuteromycota: Hyphomycetes) on Heterotermes tenuis (Isoptera: Rhinotermitidae) in Hevea brasiliensis	Revista Colombiana De Entomologia	0	0	0	0	1	0	0	0	0	0	1	0	0	0	0	0	0	0	0	0	0	0	0	0	0	0	0	0	0	0	0	0	1	0	0	1
					0	0	0	0	0	0	0	0	0	0	0	0	0	0	0	0	0	0	0	0	0	0	0	0	0	0	0	0	0	0	0	0	0	0	0	1
	T. Pukkala, T. Moykkynen, M. Thor, J. Ronnberg and J. Stenlid	2005	Modeling infection and spread of Heterobasidion annosum in even-aged Fennoscandian conifer stands	Canadian Journal of Forest Research-Revue Canadienne De Recherche Forestiere	0	0	1	1	0	0	1	0	0	0	1	0	0	0	0	0	0	0	0	0	1	0	0	0	0	0	1	0	0	0	0	0	0	0	0	1
	M. Thor, J. D. Arlinger and J. Stenlid	2006	Heterobasidion annosum root rot in Picea abies: Modelling economic outcomes of stump treatment in Scandinavian coniferous forests	Scandinavian Journal of Forest Research	0	0	1	1	0	0	1	0	0	0	1	0	0	0	0	0	0	0	0	0	0	0	0	0	0	1	0	0	0	0	0	0	0	0	0	1
	L. Y. Wang, A. Gunulf, T. Pukkala and J. Ronnberg	2015	Simulated Heterobasidion disease development in Picea abies stands following precommercial thinning and the economic justification for control measures	Scandinavian Journal of Forest Research	0	0	1	1	0	0	1	0	0	0	1	0	0	0	0	0	0	0	0	0	0	0	0	1	0	0	0	0	0	0	0	0	0	0	0	1
	J. A. N. Filipe, R. C. Cobb, R. K. Meentemeyer, C. A. Lee, Y. S. Valachovic, A. R. Cook, D. M. Rizzo and C. A. Gilligan	2012	Landscape Epidemiology and Control of Pathogens with Cryptic and Long-Distance Dispersal: Sudden Oak Death in Northern Californian Forests	Plos Computational Biology	0	0	1	1	0	0	0	1	0	0	1	0	0	1	0	0	0	0	0	0	1	0	0	1	0	0	0	0	0	0	0	0	1	0	0	1
	S. H. Levine and R. E. Wetzler	1996	Modelling the role of host plant dispersion in the search success of herbivorous insects: Implications for ecological pest management	Ecological Modelling	0	0	1	1	1	0	0	0	0	0	1	0	0	0	0	0	0	0	0	0	1	1	0	0	0	0	0	0	0	0	0	0	0	0	0	1
	M. F. Macpherson, A. Kleczkowski, J. R. Healey, C. P. Quine and N. Hanley	2017	The effects of invasive pests and pathogens on strategies for forest diversification	Ecological Modelling	0	0	1	1	0	0	0	0	0	0	1	0	0	0	0	0	0	0	0	0	1	0	0	0	0	0	0	0	0	0	0	0	0	0	0	1
	R. J. Mercader, N. W. Siegert, A. M. Liebhold and D. G. McCullough	2011	Simulating the effectiveness of three potential management options to slow the spread of emerald ash borer (Agrilus planipennis) populations in localized outlier sites	Canadian Journal of Forest Research-Revue Canadienne De Recherche Forestiere	0	0	1	1	1	0	0	0	0	0	0	0	0	1	1	0	0	0	0	0	0	0	0	1	0	0	0	0	0	0	0	0	1	0	0	1
	M. Overbeck and M. Schmidt	2012	Modelling infestation risk of Norway spruce by Ips typographus (L.) in the Lower Saxon Harz Mountains (Germany)	Forest Ecology and Management	0	0	1	1	1	0	0	0	0	0	1	0	0	0	0	0	0	0	0	0	1	0	0	0	0	0	0	0	0	0	0	0	0	0	0	1
	S. Strohm, M. L. Reid and R. C. Tyson	2016	Impacts of management on Mountain Pine Beetle spread and damage: A process-rich model	Ecological Modelling	0	0	1	1	1	0	0	0	0	0	0	0	0	1	0	0	0	0	0	0	0	0	0	1	0	0	0	0	0	0	1	0	0	0	0	1
	F. vandenBosch and A. M. deRoos	1996	The dynamics of infectious diseases in orchards with roguing and replanting as control strategy	Journal of Mathematical Biology	0	0	1	1	0	0	0	0	0	0	0	0	1	0	0	0	0	0	0	0	0	0	0	1	0	0	0	0	0	0	0	0	0	0	0	1
	K. Verheyen, M. Vanhellemont, H. Auge, L. Baeten, C. Baraloto, N. Barsoum, S. Bilodeau-Gauthier, H. Bruelheide, B. Castagneyrol, D. Godbold, J. Haase, A. Hector, H. Jactel, J. Koricheva, M. Loreau, S. Mereu, C. Messier, B. Muys, P. Nolet, A. Paquette, J. Parker, M. Perring, Q. Ponette, C. Potvin, P. Reich, A. Smith, M. Weih and M. Scherer-Lorenzen	2016	Contributions of a global network of tree diversity experiments to sustainable forest plantations	Ambio	0	0	1	1	1	0	0	0	0	0	1	0	0	0	0	0	0	0	0	0	1	0	0	0	0	0	0	0	0	0	0	0	0	0	0	1
	S. H. S. Kim, C. Vandervoort, M. E. Whalon and J. C. Wise	2014	Transovarial transmission of novaluron in Choristoneura rosaceana (Lepidoptera: Tortricidae)	Canadian Entomologist	0	0	1	1	1	0	0	0	0	0	1	0	0	0	0	0	0	0	0	0	0	0	0	0	0	0	0	0	0	0	0	0	1	0	0	1
	A. L. Knight and P. Witzgall	2013	Combining Mutualistic Yeast and Pathogenic Virus - A Novel Method for Codling Moth Control	Journal of Chemical Ecology	0	0	1	1	1	0	0	0	0	0	1	0	0	0	0	0	0	0	0	0	0	0	0	0	0	0	0	0	0	0	0	0	1	0	0	1
	A. A. Sharov and A. M. Liebhold	1998	Model of slowing the spread of gypsy moth (Lepidoptera : Lymantriidae) with a barrier zone	Ecological Applications	0	0	1	1	1	0	0	0	0	0	0	0	0	1	0	0	0	0	0	0	0	0	0	0	0	0	0	0	0	0	0	0	0	0	0	1
	J. W. Wilder, I. Christie and J. J. Colbert	1995	MODELING OF 2-DIMENSIONAL SPATIAL EFFECTS ON THE SPREAD OF FOREST PESTS AND THEIR MANAGEMENT	Ecological Modelling	0	0	1	1	1	0	0	0	0	0	1	0	0	0	0	0	0	0	0	0	0	0	0	0	0	0	0	0	0	0	0	0	1	0	0	1
	K. Kiritani and H. J. Su	1999	Papaya ring spot, banana bunchy top, and citrus greening in the Asia and Pacific region: Occurrence and control strategy	Jarq-Japan Agricultural Research Quarterly	0	0	1	0	0	0	0	0	0	0	0	0	0	0	0	0	0	0	0	0	0	0	0	0	0	0	0	0	0	0	0	0	0	0	0	1
	W. P. Steyn, M. S. Daneel, S. Serfontein and J. J. Serfontein	2014	Investigations into the Control of Litchi Tree Die-Back in South Africa	Iv International Symposium on Lychee, Longan and Other Sapindaceae Fruits	1	0	0	1	0	1	1	0	0	0	1	0	0	0	0	0	0	0	0	0	0	0	0	0	0	0	0	0	0	0	0	0	1	0	0	1
	A. P. Nyczepir	2013	FIELD PERFORMANCE OF PECAN ROOTSTOCKS FOR RESISTANCE TO MELOIDOGYNE PARTITYLA IN THE SOUTHEASTERN UNITED STATES	Nematropica	1	0	0	1	0	1	0	0	0	0	0	1	0	0	0	0	0	0	0	0	0	0	0	0	0	0	0	0	0	0	0	0	0	0	1	1
	S. Verdejo-Lucas and M. V. McKenry	2004	Management of the citrus nematode, Tylenchulus semipenetrans	Journal of Nematology	1	0	0	1	0	1	0	0	0	0	1	0	0	0	0	0	0	0	0	0	0	0	0	0	0	0	0	0	0	0	0	0	1	0	1	1
	G. Bubici and M. Cirulli	2014	Natural recovery from Verticillium wilt in olive: can it be exploited in a control strategy?	Plant and Soil	1	0	0	1	0	0	1	0	0	0	0	0	1	0	0	0	0	0	0	1	0	0	0	1	0	0	0	0	0	1	0	0	1	0	0	1
	S. O. Cacciola, R. Faedda, F. Sinatra, G. E. Agosteo, L. Schena, S. Frisullo and G. M. D. Lio	2012	OLIVE ANTHRACNOSE	Journal of Plant Pathology	1	0	0	1	0	0	1	0	0	0	0	1	0	0	0	0	0	0	0	0	0	0	0	1	0	0	0	0	0	0	0	0	1	0	0	1
	C. Casals, J. Segarra, A. De Cal, N. Lamarca and J. Usall	2015	Overwintering of Monilinia spp. on Mummified Stone Fruit	Journal of Phytopathology	1	0	0	1	0	0	1	0	0	0	1	0	0	0	0	0	0	0	0	0	0	0	0	1	0	0	0	0	0	0	0	0	0	0	0	1
	P. F. de Jong and B. Heijne	2008	Exclusion of the Inoculum Source of Brown Spot (Stemphylium vesicarium)	Proceedings of the Xth International Pear Symposium, Vols 1 and 2	1	0	0	1	0	0	1	0	0	0	1	0	0	0	0	0	0	0	0	0	0	0	0	1	0	0	0	0	0	0	0	0	0	0	0	1
	R. B. Elkins, D. M. Rizzo and E. C. Whiting	1998	Biology and management of Armillaria root disease in pear in California	Viith International Symposium on Pear Growing	1	0	0	1	0	0	1	0	0	0	1	1	0	0	0	0	0	0	0	0	0	0	0	0	0	0	1	0	0	0	0	1	0	0	0	1
	C. Gidoin, J. Avelino, O. Deheuvels, C. Cilas and M. A. N. Bieng	2014	Shade Tree Spatial Structure and Pod Production Explain Frosty Pod Rot Intensity in Cacao Agroforests, Costa Rica	Phytopathology	1	0	0	1	0	0	1	0	0	0	1	1	0	0	0	0	0	0	0	0	1	0	0	0	0	0	1	0	0	0	0	0	0	0	0	1
	J. K. C. Goud, A. J. Termorshuizen, W. J. Blok and A. H. C. van Bruggen	2004	Long-term effect of biological soil disinfestation on Verticillium wilt	Plant Disease	1	0	0	1	0	0	1	0	0	0	1	0	0	0	0	0	0	0	0	0	0	0	0	0	0	0	0	0	0	1	0	0	0	0	0	1
	I. J. Holb, B. Heijne and M. J. Jeger	2006	Effects of integrated control measures on earthworms, leaf litter and Venturia inaequalis infection in two European apple orchards	Agriculture Ecosystems & Environment	1	0	0	1	0	0	1	0	0	0	1	0	0	0	0	0	0	0	0	0	0	0	0	1	0	0	0	0	0	0	0	0	1	0	0	1
	B. A. Holtz	2002	Plant protection for pistachio	Horttechnology	1	0	0	1	1	0	1	0	0	0	1	0	0	0	0	0	0	0	0	0	0	0	0	1	0	0	0	0	0	0	0	1	1	0	0	1
	A. Masood, S. Saeed, A. Mahmood, S. A. Malik and N. Hussain	2012	Role of Nutrients in Management of Mango Sudden Death Disease in Punjab, Pakistan	Pakistan Journal of Zoology	1	0	0	1	0	0	1	0	0	0	0	1	0	0	0	1	0	0	0	0	0	0	0	0	0	0	0	0	0	0	0	0	0	0	0	1
	M. T. Mmbaga and E. C. Nnodu	2006	Biology and control of bacterial leaf blight of Cornus mas	Hortscience	1	0	0	1	0	0	1	0	0	0	1	0	0	0	1	0	0	0	0	0	0	0	0	0	0	0	0	0	0	0	0	0	1	0	0	1
	I. Morocko-Bicevska and S. Maldute	2014	Fire Blight in Latvia: Occurrence, Management and Problems	Xiii International Workshop on Fire Blight	1	0	0	1	0	0	1	0	0	0	1	0	0	0	0	0	0	0	0	0	0	0	0	1	0	0	0	0	0	0	0	0	0	0	0	1
	D. H. Noriega-Cantu, D. Teliz, G. Mora-Aguilera, J. Rodriguez-Alcazar, E. Zavaleta-Mejia, G. Otero-Colinas and C. L. Campbell	1999	Epidemiology of mango malformation in Guerrero, Mexico, with traditional and integrated management	Plant Disease	1	0	0	1	0	0	1	0	0	0	1	0	0	1	0	0	0	0	0	0	0	0	0	1	0	0	0	0	0	0	0	0	1	0	0	1
	E. Rodriguez, J. M. Garcia-Garrido, P. A. Garcia and M. Campos	2011	IMPLICATIONS OF PLANT MATERIAL ORIGIN, LAND USE HISTORY AND SOIL PROPERTIES IN THE INCIDENCE OF VERTICILLIUM WILT IN OLIVE GROVES	Journal of Plant Pathology	1	0	0	1	0	0	1	0	0	0	1	0	0	0	0	0	0	0	0	0	0	0	0	0	0	0	0	0	1	1	0	0	0	0	0	1
	W. Uddin and K. L. Stevenson	1998	Seasonal development of Phomopsis shoot blight of peach and effects of selective pruning and shoot debris management on disease incidence	Plant Disease	1	0	0	1	0	0	1	0	0	0	1	0	0	0	0	0	0	0	0	0	0	0	0	1	0	0	0	0	0	0	0	0	0	0	0	1
	R. Arias-Calderon, D. Rodriguez-Jurado, L. Leon, J. Bejarano-Alcazar, R. De la Rosa and A. Belaj	2015	Pre-breeding for resistance to Verticillium wilt in olive: Fishing in the wild relative gene pool	Crop Protection	1	0	0	1	0	0	1	0	0	0	0	1	0	0	0	0	0	0	0	0	0	0	0	0	0	0	0	0	0	0	0	0	0	0	1	1
	C. H. Bock, T. B. Brenneman, M. W. Hotchkiss and B. W. Wood	2013	Trunk applications of phosphite for the control of foliar and fruit scab on pecan	Crop Protection	1	0	0	1	0	0	1	0	0	0	0	1	0	0	0	0	0	0	0	0	0	0	0	0	0	0	0	0	0	0	0	0	1	0	0	1
	T. Buban, F. Inantsy, I. Kajati, M. Molnar, P. Sallai, L. Szoke and J. Lantos	1996	Experiences with integrated pest management in apple orchard during the initial phase of a long term study	Iobc/Wprs and Ishs International Conference on Integrated Fruit Production, Proceedings of the Meeting	1	0	0	1	1	0	1	0	0	0	0	1	0	0	0	0	0	0	0	0	0	0	0	0	0	0	0	0	0	0	0	0	1	0	0	1
	R. P. Buchner, C. Gilles, W. H. Olson, J. E. Adaskaveg, S. E. Lindow and R. Koutsoukis	2014	Walnut Blight Management Using Xanthomonas arboricola pv. juglandis Dormant Bud Population Sampling	Vii International Walnut Symposium	1	0	0	1	0	0	1	0	0	0	0	1	0	0	0	0	0	0	0	0	0	0	0	0	0	0	0	0	0	0	0	0	1	0	0	1
	C. C. Childers	2011	Assessment of an integrated pest mite and disease management program on Florida citrus utilizing 224 degrees C or 235 degrees C horticultural mineral oils (HMO)	Acarology Xiii: Proceedings of the International Congress	1	0	0	1	0	0	1	0	0	0	1	0	0	0	0	0	0	0	0	0	0	0	0	0	0	0	0	0	0	0	0	0	1	0	0	1
	M. L. Cromwell, L. P. Berkett, H. M. Darby and T. Ashikaga	2011	Alternative Organic Fungicides for Apple Scab Management and Their Non-target Effects	Hortscience	1	0	0	1	0	0	1	0	0	0	1	0	0	0	0	0	0	0	0	0	0	0	0	0	0	0	0	0	0	0	0	0	1	0	0	1
	P. A. G. Elmer, T. M. Spiers and P. N. Wood	2007	Effects of pre-harvest foliar calcium sprays on fruit calcium levels and brown rot of peaches	Crop Protection	1	0	0	1	0	0	1	0	0	0	1	0	0	0	0	0	0	0	0	0	0	0	0	0	0	0	0	0	0	0	0	0	1	0	0	1
	M. A. Favaro, R. A. Roeschlin, G. G. Ribero, R. L. Maumary, L. N. Fernandez, A. Lutz, M. Sillon, L. M. Rista, M. R. Marano and N. F. Gariglio	2017	Relationships between copper content in orange leaves, bacterial biofilm formation and citrus canker disease control after different copper treatments	Crop Protection	1	0	0	1	0	0	1	0	0	0	0	1	0	0	0	0	0	0	0	0	0	0	0	0	0	0	0	0	0	0	0	0	1	0	0	1
	P. A. Garcia-Galavis, C. Santamaria, J. A. Jimenez-Bocanegra, L. Casanova and A. Daza	2009	Susceptibility of several Japanese plum cultivars to pests and diseases in a newly established organic orchard	Scientia Horticulturae	1	0	0	1	1	0	1	0	0	0	0	1	0	0	0	0	0	0	0	0	0	0	0	0	0	0	0	0	0	0	0	0	1	0	1	1
	E. Gerami, N. Hassanzadeh, H. Abdollahi, A. Ghasemi and A. Heydari	2013	EVALUATION OF SOME BACTERIAL ANTAGONISTS FOR BIOLOGICAL CONTROL OF FIRE BLIGHT DISEASE	Journal of Plant Pathology	1	0	0	1	0	0	1	0	0	0	1	1	0	0	0	0	0	0	0	0	0	0	0	0	0	0	0	0	0	0	0	0	1	0	0	1
	H. Hajnajari, S. Tarrahi and Z. Ghahremani	2011	Correlation of Vegetative Traits with Fire Blight Resistance in Iranian and Imported Apple Cultivars	Xii International Workshop on Fire Blight	1	0	0	1	0	0	1	0	0	0	0	1	0	0	0	0	0	0	0	0	0	0	0	0	0	0	0	0	0	0	0	0	0	0	1	1
	I. J. Holb, P. Dremak, K. Bitskey and I. Gonda	2012	Yield response, pest damage and fruit quality parameters of scab-resistant and scab-susceptible apple cultivars in integrated and organic production systems	Scientia Horticulturae	1	0	0	1	0	0	1	0	0	0	1	0	0	0	0	0	0	0	0	0	0	0	0	0	0	0	0	0	0	0	0	0	1	0	0	1
	I. J. Holb and H. Scherm	2007	Temporal dynamics of brown rot in different apple management systems and importance of dropped fruit for disease development	Phytopathology	1	0	0	1	0	0	1	0	0	0	1	0	0	0	0	0	0	0	0	0	0	0	0	0	0	0	0	0	0	0	0	0	1	0	0	1
	G. Iatrou, S. Mourelatos, Z. Zartaloudis, M. Iatrou, S. Gewehr and S. Kalaitzopoulou	2016	REMOTE SENSING FOR THE MANAGEMENT OF VERTICILLIUM WILT OF OLIVE	Fresenius Environmental Bulletin	1	0	0	1	0	0	1	0	0	0	0	0	1	0	0	0	0	0	0	0	0	0	0	0	0	0	0	0	0	0	0	0	1	0	0	1
	K. B. Johnson, T. J. Smith, T. N. Temple, E. Gutierrez, R. B. Elkins and S. P. Castagnoli	2016	Integration of acibenzolar-S-methyl with antibiotics for protection of pear and apple from fire blight caused by Erwinia amylovora	Crop Protection	1	0	0	1	0	0	1	0	0	0	0	1	0	0	0	0	0	0	0	0	0	0	0	0	0	0	0	0	0	0	0	0	1	0	0	1
	L. M. Keith, L. S. Sugiyama, T. K. Matsumoto and M. A. Nagao	2016	Disease management strategy for macadamia quick decline	Xxix International Horticultural Congress on Horticulture: Sustaining Lives, Livelihoods and Landscapes	1	0	0	1	0	0	1	0	0	0	0	1	0	0	0	0	0	0	0	0	0	0	0	0	0	0	0	0	0	0	0	0	1	1	0	1
	N. Lalancette, L. L. Blaus, J. D. Gager and K. A. McFarland	2017	Contribution of Mid-Season Cover Sprays to Management of Peach Brown Rot at Harvest	Plant Disease	1	0	0	1	0	0	1	0	0	0	1	0	0	0	0	0	0	0	0	0	0	0	0	0	0	0	0	0	0	0	0	0	1	0	0	1
	N. Lalancette, D. L. Ward and J. C. Goffreda	2014	Susceptibility of Peach Cultivars to Rusty Spot and Characterization of Susceptibility Groups	Hortscience	1	0	0	1	0	0	1	0	0	0	0	1	0	0	0	0	0	0	0	0	0	0	0	0	0	0	0	0	0	0	0	0	0	0	1	1
	Z. Lan and H. Scherm	2003	Reduced midseason pesticide program for control of scab and plum curculio in peach	Plant Disease	1	0	0	1	0	0	1	0	0	0	1	0	0	0	0	0	0	0	0	0	0	0	0	0	0	0	0	0	0	0	0	0	1	0	0	1
	E. Llorens, E. Fernandez-Crespo, G. Camanes, L. Lapena and P. Garcia-Agustin	2015	Enhancing Physiological Parameters Improves Resistance against Alternaria alternata in 'Fortune' Mandarin	Xii International Citrus Congress - International Society of Citriculture	1	0	0	1	0	0	1	0	0	0	0	1	0	0	0	0	0	0	0	0	0	0	0	0	0	0	0	0	0	0	0	0	1	0	0	1
	L. J. Marais	2015	Efficacy of Water Soluble Silicon in Managing Fusarium Dry Root Rot of Citrus	Xii International Citrus Congress - International Society of Citriculture	1	0	0	1	0	0	1	0	0	0	0	0	0	0	0	0	0	0	0	0	0	0	0	0	0	0	0	0	0	0	0	0	1	0	0	1
	M. Mardi, S. M. K. Nekouei, L. K. Farsad, F. Ehya, M. Shabani, M. Shafiee, M. Tabatabaei, M. R. Safarnejad, G. S. Jouzani and G. H. Salekdeh	2011	Witches' broom disease of Mexican lime trees: disaster to be addressed before it will be too late	Bulletin of Insectology	1	0	0	1	0	0	1	0	0	0	1	0	0	0	0	0	0	0	0	0	0	0	0	0	0	0	0	0	0	0	0	0	1	0	0	1
	J. Martinez, A. Nunez and D. Ojeda	2010	Effect of Increased Epiphytic Population on Reduction of Fire Blight (Erwinia amylovora) Infection on Apple Trees	Organic Fruit Conference	1	0	0	1	0	0	1	0	0	0	1	0	0	0	0	0	0	0	0	0	0	0	0	0	0	0	0	0	0	0	0	0	1	0	0	1
	M. E. Matheron and R. E. Call	1998	Factors affecting the development and management of septoria leaf spot of pistachio in Arizona	Second International Symposium on Pistachios and Almonds	1	0	0	1	0	0	1	0	0	0	1	0	0	0	0	0	0	0	0	0	0	0	0	0	0	0	0	0	0	0	0	0	1	0	0	1
	M. Mazzola and J. Brown	2010	Efficacy of Brassicaceous Seed Meal Formulations for the Control of Apple Replant Disease in Conventional and Organic Production Systems	Plant Disease	1	0	0	1	0	0	1	0	0	0	1	0	0	0	0	0	0	0	0	0	0	0	0	0	0	0	0	0	0	0	0	0	1	0	0	1
	M. Meland, M. E. Moe and O. Froynes	2008	Sweet Cherry Trees Decay and Managements on Replanted Cherry Land	Proceedings of the Vth International Cherry Symposium, Vols 1 and 2	1	0	0	1	0	0	1	0	0	0	0	1	0	0	0	0	0	0	0	0	0	0	0	0	0	0	0	0	0	0	0	0	0	0	1	1
	A. K. Miles, S. L. Willingham and A. W. Cooke	2005	Field evaluation of a plant activator, captan, chlorothalonil, copper hydroxide, iprodione, mancozeb and strobilurins for the control of citrus brown spot of mandarin	Australasian Plant Pathology	1	0	0	1	0	0	1	0	0	0	1	0	0	0	0	0	0	0	0	0	0	0	0	0	0	0	0	0	0	0	0	0	1	0	0	1
	M. A. Nofal and W. M. Haggag	2006	Integrated management of powdery mildew of mango in Egypt	Crop Protection	1	0	0	1	0	0	1	0	0	0	1	0	0	0	0	0	0	0	0	0	0	0	0	0	0	0	0	0	0	0	0	0	1	0	0	1
	H. X. Peng, X. Y. Wei, Y. X. Xiao, Y. Sun, A. R. Biggs, M. L. Gleason, S. P. Shang, M. Q. Zhu, Y. Z. Guo and G. Y. Sun	2016	Management of Valsa Canker on Apple with Adjustments to Potassium Nutrition	Plant Disease	1	0	0	1	0	0	1	0	0	0	0	1	0	0	0	0	0	0	0	0	0	0	0	0	0	0	0	0	0	0	0	0	1	0	0	1
	G. C. Percival and S. Boyle	2005	Evaluation of microcapsule trunk injections for the control of apple scab and powdery mildew	Annals of Applied Biology	1	0	0	1	0	0	1	0	0	0	0	1	0	0	0	0	0	0	0	0	0	0	0	0	0	0	0	0	0	0	0	0	1	0	0	1
	G. C. Percival and S. Boyle	2009	Evaluation of film forming polymers to control apple scab (Venturia inaequalis (Cooke) G. Wint.) under laboratory and field conditions	Crop Protection	1	0	0	1	0	0	1	0	0	0	1	0	0	0	0	0	0	0	0	0	0	0	0	0	0	0	0	0	0	0	0	0	1	0	0	1
	G. C. Percival, K. Noviss and I. Haynes	2009	Field evaluation of systemic inducing resistance chemicals at different growth stages for the control of apple (Venturia inaequalis) and pear (Venturia pirina) scab	Crop Protection	1	0	0	1	0	0	1	0	0	0	0	1	0	0	0	0	0	0	0	0	0	0	0	0	0	0	0	0	0	0	0	0	1	0	0	1
	R. C. Ploetz, J. M. Perez-Martinez, E. A. Evans and S. A. Inch	2011	Toward Fungicidal Management of Laurel Wilt of Avocado	Plant Disease	1	0	0	1	0	0	1	0	0	0	0	1	0	0	0	0	0	0	0	0	0	0	0	0	0	0	0	0	0	0	0	0	1	0	0	1
	R. J. Prokopy	2003	Two decades of bottom-up, ecologically based pest management in a small commercial apple orchard in Massachusetts	Agriculture Ecosystems & Environment	1	0	0	1	1	0	1	0	0	0	1	1	0	0	0	0	0	0	0	0	0	0	0	0	0	0	0	0	0	0	0	0	1	0	0	1
	M. Puig, C. Moragrega, L. Ritz, E. Montesinos and I. Llorente	2015	Controlling Brown Spot of Pear by a Synthetic Antimicrobial Peptide Under Field Conditions	Plant Disease	1	0	0	1	0	0	1	0	0	0	1	0	0	0	0	0	0	0	0	0	0	0	0	0	0	0	0	0	0	0	0	0	1	0	0	1
	G. J. Puterka	1999	Fungal pathogens for arthropod pest control in orchard systems: mycoinsecticidal approach for pear psylla control	Biocontrol	1	0	0	1	0	0	1	0	0	0	1	0	0	0	0	0	0	0	0	0	0	0	0	0	0	0	0	0	0	0	0	0	1	0	0	1
	M. Reuveni	2001	Improved control of powdery mildew (Sphaerotheca pannosa) of nectarines in Israel using strobilurin and polyoxin B fungicides; mixtures with sulfur; and early bloom applications	Crop Protection	1	0	0	1	0	0	1	0	0	0	1	0	0	0	0	0	0	0	0	0	0	0	0	0	0	0	0	0	0	0	0	0	1	0	0	1
	M. Reuveni, M. Harpaz and R. Reuveni	1998	Integrated control of powdery mildew on field-grown mango trees by foliar sprays of mono-potassium phosphate fertilizer, sterol inhibitor fungicides and the strobilurin Kresoxym-methyl	European Journal of Plant Pathology	1	0	0	1	0	0	1	0	0	0	1	0	0	0	0	0	0	0	0	0	0	0	0	0	0	0	0	0	0	0	0	0	1	0	0	1
	M. Reuveni, D. Oppenheim and R. Reuveni	1998	Integrated control of powdery mildew on apple trees by foliar sprays of mono-potassium phosphate fertilizer and sterol inhibiting fungicides	Crop Protection	1	0	0	1	0	0	1	0	0	0	1	0	0	0	0	0	0	0	0	0	0	0	0	0	0	0	0	0	0	0	0	0	1	0	0	1
	M. Reuveni and R. Reuveni	1998	Foliar applications of mono-potassium phosphate fertilizer inhibit powdery mildew development in nectarine trees	Canadian Journal of Plant Pathology-Revue Canadienne De Phytopathologie	1	0	0	1	0	0	1	0	0	0	1	0	0	0	0	0	0	0	0	0	0	0	0	0	0	0	0	0	0	0	0	0	1	0	0	1
	Z. Rozsryay and J. Apostol	2005	Breeding for sweet and sour cherry disease resistance in Hungary	Proceedings of the IVth International Cherry Symposium, Vols 1 and 2	1	0	0	1	0	0	1	0	0	0	0	1	0	0	0	0	0	0	0	0	0	0	0	0	0	0	0	0	0	0	0	0	0	0	1	1
	A. Safdar, S. A. Khan and M. A. Safdar	2015	Pathogenic Association and Management of Botryodiplodia theobromae in Guava Orchards at Sheikhupura District, Pakistan	International Journal of Agriculture and Biology	1	0	0	1	0	0	1	0	0	0	1	0	0	0	0	0	0	0	0	0	0	0	0	0	0	0	0	0	0	0	0	0	1	0	0	1
	R. J. Schnell, J. S. Brown, D. N. Kuhn, C. Cervantes-Martinez, J. W. Borrone, C. T. Olano, J. C. Motamayor, U. Lopes, W. Phillips, E. Johnson, E. J. Monteverde-Penso and F. Amores	2007	Current challenges of tropical tree crop improvement: Integrating genomics into an applied cacao breeding program	Proceedings of the International Symposium on Biotechnology of Temperate Fruit Crops and Tropical Species	1	0	0	1	0	0	1	0	0	0	0	1	0	0	0	0	0	0	0	0	0	0	0	0	0	0	0	0	0	0	0	0	0	0	1	1
	J. N. Sharma, P. K. Sharma and A. Sharma	2005	Studies on epidemiology and management of Marssonina blotch, the cause of premature leaf fall in apple	Integrated Plant Disease Management	1	0	0	1	0	0	1	0	0	0	1	0	0	0	0	0	0	0	0	0	0	0	0	0	0	0	0	0	0	0	0	0	1	0	0	1
	P. L. Sholberg, W. D. Lane, P. Haag, K. Bedford and L. Lashuk	2001	A novel technique for evaluation of apple (Malus x domestica Borkh.) cultivars for susceptibility to powdery mildew	Canadian Journal of Plant Science	1	0	0	1	0	0	1	0	0	0	0	1	0	0	0	0	0	0	0	0	0	0	0	0	0	0	0	0	0	0	0	0	0	0	1	1
	D. Sugar and R. J. Hilton	2011	Potential Organic Methods for Management of Pear Scab	Xi International Pear Symposium	1	0	0	1	0	0	1	0	0	0	1	0	0	0	0	0	0	0	0	0	0	0	0	0	0	0	0	0	0	0	0	0	1	0	0	1
	B. W. Wood, C. C. Reilly, C. H. Bock and M. W. Hotchkiss	2012	Suppression of Pecan Scab by Nickel	Hortscience	1	0	0	1	0	0	1	0	0	0	1	0	0	0	0	0	0	0	0	0	0	0	0	0	0	0	0	0	0	0	0	0	1	0	0	1
	J. K. Konam and D. I. Guest	2002	Leaf litter mulch reduces the survival of Phytophthora palmivora under cocoa trees in Papua New Guinea	Australasian Plant Pathology	1	0	0	1	0	0	0	1	0	0	1	0	0	0	0	0	0	0	0	0	0	0	0	0	1	0	0	0	0	0	0	0	0	0	0	1
	I. A. Merwin, W. F. Wilcox and W. C. Stiles	1992	INFLUENCE OF ORCHARD GROUND COVER MANAGEMENT ON THE DEVELOPMENT OF PHYTOPHTHORA CROWN AND ROOT ROTS OF APPLE	Plant Disease	1	0	0	1	0	0	0	1	0	0	1	0	0	0	0	0	0	0	0	0	0	0	0	0	1	0	0	0	0	1	0	0	1	0	0	1
	P. Deberdt, C. V. Mfegue, P. R. Tondje, M. C. Bon, M. Ducamp, C. Hurard, B. A. D. Begoude, M. Ndoumbe-Nkeng, P. K. Hebbar and C. Cilas	2008	Impact of environmental factors, chemical fungicide and biological control on cacao pod production dynamics and black pod disease (Phytophthora megakarya) in Cameroon	Biological Control	1	0	0	1	0	0	0	1	0	0	1	0	0	0	0	0	0	0	0	0	0	0	0	0	0	0	0	0	0	0	0	0	1	0	0	1
	P. J. McMahon, A. Purwantara, A. Wahab, M. Imron, S. Lambert, P. J. Keane and D. I. Guest	2010	Phosphonate applied by trunk injection controls stem canker and decreases Phytophthora pod rot (black pod) incidence in cocoa in Sulawesi	Australasian Plant Pathology	1	0	0	1	0	0	0	1	0	0	0	1	0	0	0	0	0	0	0	0	0	0	0	0	0	0	0	0	0	0	0	0	1	0	0	1
	M. Ndoumbe-Nkeng, C. Cilas, E. Nyemb, S. Nyasse, D. Bieysse, A. Flori and I. Sache	2004	Impact of removing diseased pods on cocoa black pod caused by Phytophthora megakarya and on cocoa production in Cameroon	Crop Protection	1	0	0	1	0	0	0	1	0	0	0	0	0	0	0	0	0	0	0	0	0	0	0	0	0	0	0	0	0	0	0	0	0	0	0	1
	J. G. Ramirez-Gil, D. A. Castaneda-Sanchez and J. G. Morales-Osorio	2017	Production of avocado trees infected with Phytophthora cinnamomi under different management regimes	Plant Pathology	1	0	0	1	0	0	0	1	0	0	0	1	0	0	0	0	0	0	0	0	0	0	0	0	0	0	0	0	0	0	0	0	1	0	0	1
	G. M. ten Hoopen, R. Rees, P. Aisa, T. Stirrup and U. Krauss	2003	Population dynamics of epiphytic mycoparasites of the genera Clonostachys and Fusarium for the biocontrol of black pod (Phytophthora palmivora) and moniliasis (Moniliophthora roreri) on cocoa (Theobroma cacao)	Mycological Research	1	0	0	1	0	0	0	1	0	0	0	1	0	0	0	0	0	0	0	0	0	0	0	0	0	0	0	0	0	0	0	0	1	0	0	1
	T. L. Widmer, J. H. Graham and D. J. Mitchell	1998	Composted municipal waste reduces infection of citrus seedlings by Phytophthora nicotianae	Plant Disease	1	0	0	1	0	0	0	1	0	0	1	0	0	0	0	0	0	0	0	0	0	0	0	0	0	0	0	0	0	0	0	0	1	0	0	1
	V. Balan, A. Ivascu, S. Toma and M. Oprea	2000	Aspects of apricot tree culture as related to the concept of sustainable fruit tree growing	Proceedings of the International Conference on Integrated Fruit Production	1	0	0	1	0	0	0	0	0	0	1	1	1	0	0	0	0	1	0	0	1	0	0	0	0	0	0	0	0	0	0	0	1	0	1	1
	B. A. Croft and H. K. Luh	2004	Phytoseiid mites on unsprayed apple trees in Oregon, and other Western States (USA): distributions, life-style types and relevance to commercial orchards	Experimental and Applied Acarology	1	0	0	1	1	0	0	0	0	0	1	0	0	0	0	0	0	0	0	1	0	0	0	0	1	0	0	0	1	0	0	0	1	0	0	1
	N. J. Cunniffe, F. F. Laranjeira, F. M. Neri, R. E. DeSimone and C. A. Gilligan	2014	Cost-Effective Control of Plant Disease When Epidemiological Knowledge Is Incomplete: Modelling Bahia Bark Scaling of Citrus	Plos Computational Biology	1	0	0	1	0	0	0	0	0	0	0	0	0	1	0	0	0	0	0	0	0	0	0	1	0	0	1	0	0	0	0	0	0	0	0	1
	P. R. Demite and R. J. F. Feres	2005	Influence of neighboring vegetation in the distribution of mites in a rubber tree culture (Hevea brasiliensis Muell. Arg., Euphorbiaceae) in Sao Jose do Rio Preto, SP, Brazil	Neotropical Entomology	1	0	0	1	1	0	0	0	0	0	1	0	0	1	0	0	0	0	0	0	0	0	0	0	0	0	0	0	1	0	0	0	0	0	0	1
	P. R. Demite and R. J. F. Feres	2008	Influence of cerrado fragments in the distribution of mites in rubber tree crop	Neotropical Entomology	1	0	0	1	1	0	0	0	0	0	1	0	0	0	0	0	0	0	0	0	0	0	0	0	0	0	0	0	1	0	0	0	0	0	0	1
	J. D. Dutcher, L. Wells, T. B. Brenneman and M. G. Patterson	2010	INTEGRATION OF INSECT AND MITE MANAGEMENT WITH DISEASE AND WEED CONTROL IN PECAN PRODUCTION	Integrated Management of Arthropod Pests and Insect Borne Diseases	1	0	0	1	1	0	0	0	0	0	1	0	0	0	0	0	0	0	0	0	0	0	0	0	1	0	0	0	0	0	0	0	1	0	0	1
	K. Funayama	2016	Influence of mowing on dynamics of native phytoseiid mites and Tetranychus urticae in apple orchards in northern Japan	Experimental and Applied Acarology	1	0	0	1	1	0	0	0	0	0	1	0	0	0	0	0	0	0	0	0	0	0	0	0	1	0	0	0	0	0	0	0	0	0	0	1
	K. A. Grogan and M. Mosquera	2015	The Effects and Value of a Resistant Perennial Variety: An Application to Pudrici<remove>n del Cogollo Disease	American Journal of Agricultural Economics	1	0	0	1	1	0	0	0	0	0	1	0	0	0	0	0	0	0	0	0	1	0	0	0	0	0	0	0	0	0	0	0	0	0	0	1
	H. Karar, A. H. Sayyed, M. J. Arif, M. Ashfaq and M. Aslam	2010	Integration of cultural and mechanical practices for management of the mango mealybug Drosicha mangiferae	Phytoparasitica	1	0	0	1	1	0	0	0	0	0	0	1	0	0	0	0	0	0	0	1	0	0	0	0	0	0	0	0	0	0	0	0	0	0	0	1
	A. L. Knight	1998	Management of codling moth (Lepidoptera : Tortricidae) in apple with overhead watering	Journal of Economic Entomology	1	0	0	1	1	0	0	0	0	0	1	0	0	0	0	0	0	0	0	0	0	0	0	0	0	0	0	0	0	0	0	1	0	0	0	1
	X. Martini, K. S. Pelz-Stelinski and L. L. Stelinski	2015	Absence of windbreaks and replanting citrus in solid sets increase density of Asian citrus psyllid populations	Agriculture Ecosystems & Environment	1	0	0	1	1	0	0	0	0	0	1	0	0	0	0	0	0	0	0	0	1	0	0	0	0	0	0	0	0	0	0	0	0	0	0	1
	J. R. Medina, O. S. Opina, L. R. A. de Jesus and S. M. F. Calumpang	2005	Development of an integrated pest management program for mango in Palawan, Philippines	Philippine Agricultural Scientist	1	0	0	1	1	0	0	0	0	0	1	0	0	0	0	0	0	0	0	0	0	0	0	0	0	0	1	0	0	0	0	0	1	0	0	1
	S. A. Mirjalili and E. Poorazizi	2015	Integrated Pest Management for Carob Moth (Spectrobates ceratoniae Zell.) in Iran	Iii International Symposium on Pomegranate and Minor Mediterranean Fruits	1	0	0	1	1	0	0	0	0	0	1	0	0	0	0	0	0	0	0	0	0	0	0	1	1	0	0	0	0	0	0	0	1	0	0	1
	M. L. Otero, M. Roca, R. Zapata, J. L. Ladux, J. Ortiz, M. Zanelli, A. C. Matias and B. A. Perez	2014	Effect of Solarization, Organic Matter, and Trichoderma on the Severity of Verticillium Wilt in Olive Trees (Olea europaea L.) and Soil Inoculum Density	Vii International Symposium on Olive Growing	1	0	0	1	0	0	0	0	0	0	1	0	0	0	0	0	0	0	0	0	0	0	0	0	0	0	0	0	0	1	0	0	1	0	0	1
	D. Paredes, L. Cayuela and M. Campos	2013	Synergistic effects of ground cover and adjacent vegetation on natural enemies of olive insect pests	Agriculture Ecosystems & Environment	1	0	0	1	1	0	0	0	0	0	1	0	0	0	0	0	0	0	0	0	0	0	0	0	1	0	0	0	0	0	0	0	0	0	0	1
	R. S. Pfannenstiel, B. E. Mackey and T. R. Unruh	2012	Leafroller parasitism across an orchard landscape in central Washington and effect of neighboring rose habitats on parasitism	Biological Control	1	0	0	1	1	0	0	0	0	0	1	0	0	0	0	0	0	0	0	0	0	0	0	0	0	0	0	0	1	0	0	0	1	0	0	1
	M. S. Picchi, S. Marchi, A. Albertini and R. Petacchi	2017	Organic management of olive orchards increases the predation rate of overwintering pupae of Bactrocera oleae (Diptera: Tephritidae)	Biological Control	1	0	0	1	1	0	0	0	0	0	1	0	0	0	0	0	0	0	0	0	0	0	0	0	0	0	0	0	1	0	0	0	1	0	0	1
	R. Rieux, S. Simon and H. Defrance	1999	Role of hedgerows and ground cover management on arthropod populations in pear orchards	Agriculture Ecosystems & Environment	1	0	0	1	1	0	0	0	0	0	0	1	0	0	0	0	0	0	0	0	0	0	0	0	1	0	0	0	0	0	0	0	0	0	0	1
	M. H. Sauge, I. Grechi and J. L. Poessel	2010	Nitrogen fertilization effects on Myzus persicae aphid dynamics on peach: vegetative growth allocation or chemical defence?	Entomologia Experimentalis Et Applicata	1	0	0	1	1	0	0	0	0	0	1	0	0	0	0	0	0	0	0	0	0	0	0	0	0	0	0	0	0	1	0	0	0	0	0	1
	S. E. Senger, R. Tyson, B. D. Roitberg, H. M. A. Thistlewood, A. S. Harestad and M. T. Chandler	2009	Influence of Habitat Structure and Resource Availability on the Movements of Rhagoletis indifferens (Diptera: Tephritidae)	Environmental Entomology	1	0	0	1	1	0	0	0	0	0	1	0	0	0	0	0	0	0	0	1	0	0	0	0	0	0	0	0	0	0	0	0	0	0	0	1
	P. T. Thorpe, J. S. Pryke and M. J. Samways	2016	Review of ecological and conservation perspectives on future options for arthropod management in Cape Floristic Region pome fruit orchards	African Entomology	1	0	0	1	1	0	0	0	0	0	1	0	0	0	0	0	0	0	0	0	1	0	0	0	0	0	0	0	1	0	0	0	1	0	0	1
	A. F. Tomaseto, R. Krugner and J. R. S. Lopes	2016	Effect of plant barriers and citrus leaf age on dispersal of Diaphorina citri (Hemiptera: Liviidae)	Journal of Applied Entomology	1	0	0	1	1	0	0	0	0	0	1	0	0	0	0	0	0	0	0	0	1	1	0	0	0	0	0	0	0	0	0	0	0	0	0	1
	R. A. Van Steenwyk, C. F. Fouche, C. A. Ingels and R. B. Elkins	2015	Codling Moth: a Cultural Control Management Option	Xii International Pear Symposium	1	0	0	1	1	0	0	0	0	0	1	0	0	0	0	0	0	0	0	0	0	0	0	1	0	0	0	0	0	0	0	0	0	0	0	1
	B. W. Wood and C. C. Reilly	2000	Pest damage to pecan is affected by irrigation, nitrogen application, and fruit load	Hortscience	1	0	0	1	1	0	0	0	0	0	1	0	0	0	0	0	0	0	0	0	0	0	0	0	0	0	0	0	0	0	0	1	1	0	0	1
	F. Beaulieu and A. R. Weeks	2007	Free-living mesostigmatic mites in Australia: their roles in biological control and bioindication	Australian Journal of Experimental Agriculture	1	0	0	1	1	0	0	0	0	0	0	0	0	0	0	0	0	0	0	0	0	0	0	0	0	0	0	0	0	0	0	0	1	0	0	1
	L. P. Berkett, T. L. Bradshaw, M. C. Griffith, S. L. Kingsley-Richards, R. E. Moran, H. M. Darby, M. E. Garcia and R. L. Parsons	2013	Disease and Arthropod Evaluation of Five Apple Cultivars under Organic Management in Vermont, USA	Ii International Organic Fruit Symposium	1	0	0	1	1	0	0	0	0	0	0	1	0	0	0	0	0	0	0	0	0	0	0	0	0	0	0	0	0	0	0	0	0	0	1	1
	E. Bockmann, K. Koppler, E. Hummel and H. Vogt	2014	Bait spray for control of European cherry fruit fly: an appraisal based on semi-field and field studies	Pest Management Science	1	0	0	1	1	0	0	0	0	0	0	1	0	0	0	0	0	0	0	0	0	0	0	0	0	0	0	0	0	0	0	0	1	0	0	1
	D. R. Boina and J. R. Bloomquist	2015	Chemical control of the Asian citrus psyllid and of huanglongbing disease in citrus	Pest Management Science	1	0	0	1	1	0	0	0	0	0	0	1	0	0	0	0	0	0	0	0	0	0	0	0	0	0	0	0	0	0	0	0	1	0	0	1
	K. Buzzetti, R. A. Chorbadjian and R. Nauen	2015	Resistance Management for San Jose Scale (Hemiptera: Diaspididae)	Journal of Economic Entomology	1	0	0	1	1	0	0	0	0	0	0	0	0	0	0	0	0	0	0	0	0	0	0	0	0	0	0	0	0	0	0	0	1	0	0	1
	P. Chueca, E. E. Grafton-Cardwell and E. Molto	2009	Influence of Spray Equipment and Water Volume on Coverage of Citrus and Control of Citricola Scale, Coccus pseudomagnoliarum (Hemiptera: Coccidae) With Mineral Oil	Journal of Economic Entomology	1	0	0	1	1	0	0	0	0	0	1	0	0	0	0	0	0	0	0	0	0	0	0	0	0	0	0	0	0	0	0	0	1	0	0	1
	W. R. Cooper and D. R. Horton	2015	Effects of elicitors of host plant defenses on pear psylla, Cacopsylla pyricola	Entomologia Experimentalis Et Applicata	1	0	0	1	1	0	0	0	0	0	0	1	0	0	0	0	0	0	0	0	0	0	0	0	0	0	0	0	0	0	0	0	1	0	0	1
	T. E. Cottrell, T. G. Beckman and D. L. Horton	2011	Lesser Peachtree Borer (Lepidoptera: Sesiidae) Oviposition on Prunus Germplasm	Environmental Entomology	1	0	0	1	1	0	0	0	0	0	0	1	0	0	0	0	0	0	0	0	0	0	0	0	0	0	0	0	0	0	0	0	0	0	1	1
	B. A. Croft and I. V. Macrae	1993	BIOLOGICAL-CONTROL OF APPLE MITES - IMPACT OF ZETZELLIA-MALI (ACARI, STIGMAEIDAE) ON TYPHLODROMUS-PYRI AND METASEIULUS-OCCIDENTALIS (ACARI, PHYTOSEIIDAE)	Environmental Entomology	1	0	0	1	1	0	0	0	0	0	1	0	0	0	0	0	0	0	0	0	0	0	0	0	0	0	0	0	0	0	0	0	1	0	0	1
	L. Dibog, R. Babin, J. A. A. Mbang, B. Decazy, S. Nyasse, C. Cilas and A. B. Eskes	2008	Effect of genotype of cocoa (Theobroma cacao) on attractiveness to the mirid Sahlbergella singularis (Hemiptera : Miridae) in the laboratory	Pest Management Science	1	0	0	1	1	0	0	0	0	0	0	1	0	0	0	0	0	0	0	0	0	0	0	0	0	0	0	0	0	0	0	0	0	0	1	1
	A. Firlej, G. Chouinard, Y. Morin, D. Cormier and D. Coderre	2003	Establishment and dispersal of the predator Hyaliodes vitripennis Hemiptera : Miridae following introductions in a commercial apple orchard in Quebec	Phytoprotection	1	0	0	1	1	0	0	0	0	0	1	0	0	1	0	0	0	0	0	0	0	0	0	0	0	0	0	0	0	0	0	0	1	0	0	1
	F. Gatineau, F. Bonnot, T. T. H. Yen, D. H. Tuan, N. D. Tuyen and N. T. N. Truc	2010	Effects of imidacloprid and fenobucarb on the dynamics of the psyllid Diaphorina citri Kuwayama and on the incidence of Candidatus Liberibacter asiaticus	Fruits	1	0	0	1	1	0	0	0	0	0	0	1	0	0	0	0	0	0	0	0	0	0	0	0	0	0	0	0	0	0	0	0	1	0	0	1
	E. E. Graftoncardwell and Y. Ouyang	1995	AUGMENTATION OF EUSEIUS-TULARENSIS (ACARI, PHYTOSEIIDAE) IN CITRUS	Environmental Entomology	1	0	0	1	1	0	0	0	0	0	1	0	0	0	0	0	0	0	0	0	0	0	0	0	0	0	0	0	0	0	0	0	1	0	0	1
	J. M. Hardman, W. van der Werf and J. P. Nyrop	1999	Modelling mite dynamics on apple trees in Eastern North America	Proceedings of the Fifth International Symposium on Computer Modelling in Fruit Research and Orchard Management	1	0	0	1	1	0	0	0	0	0	1	0	0	0	0	0	0	0	0	0	0	0	0	0	0	0	0	0	0	0	0	0	1	0	0	1
	E. Hegazi, A. Herz, S. A. Hassan, W. E. Khafagi, E. Agamy, A. Zaitun, G. A. El-Aziz, S. Showeil, S. El-Said and N. Khamis	2007	Field efficiency of indigenous egg parasitoids (Hymenoptera, Trichogrammatidae) to control the olive moth (Prays oleae, Lepidoptera, Yponomeutidae) and the jasmine moth (Palpita unionalis, Lepidoptera, Pyralidae) in an olive plantation in Egypt	Biological Control	1	0	0	1	1	0	0	0	0	0	1	0	0	0	0	0	0	0	0	0	0	0	0	0	0	0	0	0	0	0	0	0	1	0	0	1
	M. S. Hossain, M. Hossain, D. G. Williams and S. Chandra	2013	Management of Carpophilus spp. beetles (Nitidulidae) in stone fruit orchards by reducing the number of attract-and-kill traps in neighbouring areas	International Journal of Pest Management	1	0	0	1	1	0	0	0	0	0	1	0	0	0	0	0	0	0	0	0	0	0	0	0	0	0	0	0	0	0	0	0	1	0	0	1
	K. Ichinose, D. V. Bang, D. H. Tuan and L. Q. Dien	2010	Effective Use of Neonicotinoids for Protection of Citrus Seedlings From Invasion by Diaphorina citri (Hemiptera: Psyllidae)	Journal of Economic Entomology	1	0	0	1	1	0	0	0	0	0	1	0	0	0	0	0	0	0	0	0	0	0	0	0	0	0	0	0	0	0	0	0	1	0	0	1
	T. Itioka, T. Inoue and N. Ishida	1992	A 10-YEAR STUDY OF POPULATION-DYNAMICS OF CITRUS PESTS IN THE PESTICIDE-REDUCED ORCHARD	Researches on Population Ecology	1	0	0	1	1	0	0	0	0	0	1	0	0	0	0	0	0	0	0	0	0	0	0	0	0	0	0	0	0	0	0	0	1	0	0	1
	D. T. Johnson, B. Lewis, C. R. Rom, H. Friedrich, R. Bryant and M. Pszczolkowski	2010	Organic Fruit Production Needs and Pest Management Practices in the Southeastern United States	Organic Fruit Conference	1	0	0	1	1	0	0	0	0	0	1	0	0	0	0	0	0	0	0	0	0	0	0	0	0	0	0	0	0	0	0	0	1	0	0	1
	H. Kutinkova and V. Dzhuvinov	2016	Apple breeding for resistance to the aphids Dysaphis plantaginea and Aphis pomi in Bulgaria	Xxix International Horticultural Congress on Horticulture: Sustaining Lives, Livelihoods and Landscapes	1	0	0	1	1	0	0	0	0	0	0	1	0	0	0	0	0	0	0	0	0	0	0	0	0	0	0	0	0	0	0	0	0	0	1	1
	L. A. Lacey, D. I. Shapiro-Ilan and G. M. Glenn	2010	Post-application of anti-desiccant agents improves efficacy of entomopathogenic nematodes in formulated host cadavers or aqueous suspension against diapausing codling moth larvae (Lepidoptera: Tortricidae)	Biocontrol Science and Technology	1	0	0	1	1	0	0	0	0	0	1	0	0	0	0	0	0	0	0	0	0	0	0	0	0	0	0	0	0	0	0	0	1	0	0	1
	N. Lalancette, L. A. Furman and J. F. White	2013	Management of peach rusty spot epidemics with biorational fungicides	Crop Protection	1	0	0	1	1	0	0	0	0	0	1	0	0	0	0	0	0	0	0	0	0	0	0	0	0	0	0	0	0	0	0	0	1	0	0	1
	P. J. Lester, H. M. A. Thistlewood and R. Harmsen	1998	The effects of refuge size and number on acarine predator-prey dynamics in a pesticide-disturbed apple orchard	Journal of Applied Ecology	1	0	0	1	1	0	0	0	0	0	1	0	0	0	0	0	0	0	0	0	0	0	0	0	0	0	0	0	0	0	0	0	1	0	0	1
	X. L. Li, S. Geng, H. J. Chen, C. Jung, C. L. Wang, H. T. Tu and J. Y. Zhang	2017	Mass trapping of apple leafminer, Phyllonorycter ringoniella with sex pheromone traps in apple orchards	Journal of Asia-Pacific Entomology	1	0	0	1	1	0	0	0	0	0	1	0	0	0	0	0	0	0	0	0	0	0	0	0	0	0	0	0	0	0	0	0	1	0	0	1
	V. Mercier, F. Combe, G. Fauvel, G. Marboutie and Y. Lespinasse	2000	A four year experiment on the development of mite populations on scab resistant apples	Proceedings of the International Conference on Integrated Fruit Production	1	0	0	1	1	0	0	0	0	0	0	1	0	0	0	0	0	0	0	0	0	0	0	0	0	0	0	0	0	0	0	0	0	0	1	1
	S. G. Middleton, A. G. Zeppa, P. R. Nimmo and C. M. Horlock	2007	Organic production of a new Australian-bred scab resistant apple in Queensland, Australia	Proceedings of the Ist International Symposium on Organic Apple and Pear	1	0	0	1	1	0	0	0	0	0	0	1	0	0	0	0	0	0	0	0	0	0	0	0	0	0	0	0	0	0	0	0	0	0	1	1
	M. P. Miranda, P. T. Yamamoto, R. B. Garcia, J. P. A. Lopes and J. R. S. Lopes	2016	Thiamethoxam and imidacloprid drench applications on sweet orange nursery trees disrupt the feeding and settling behaviour of Diaphorina citri (Hemiptera: Liviidae)	Pest Management Science	1	0	0	1	1	0	0	0	0	0	1	0	0	0	0	0	0	0	0	0	0	0	0	0	0	0	0	0	0	0	0	0	1	0	0	1
	A. Moore, D. C. Barahona, K. A. Lehman, D. D. Skabeikis, I. R. Iriarte, E. B. Jang and M. S. Siderhurst	2017	Judas Beetles: Discovering Cryptic Breeding Sites by Radio-Tracking Coconut Rhinoceros Beetles, Oryctes rhinoceros (Coleoptera: Scarabaeidae)	Environmental Entomology	1	0	0	1	1	0	0	0	0	0	1	0	0	0	0	0	0	0	0	0	0	0	0	0	0	0	0	0	0	0	0	0	1	0	0	1
	M. Mulaaa, A. Cherunya, J. Wanyama and A. Mugita	2011	Screening Citrus Rootstock/Scion Combinations for Tolerance to Major Pests and Diseases in North Rift Kenya	I All Africa Horticultural Congress	1	0	0	1	0	0	0	0	0	0	0	1	0	0	0	0	0	0	0	0	0	0	0	0	0	0	0	0	0	0	0	0	0	0	1	1
	C. T. Myers and L. A. Hull	2003	Insect growth regulator impact on fecundity and fertility of adult tufted apple bud moth, Platynota idaeusalis Walker	Journal of Entomological Science	1	0	0	1	1	0	0	0	0	0	1	0	0	0	0	0	0	0	0	0	0	0	0	0	0	0	0	0	0	0	0	0	1	0	0	1
	C. Negrisoli, A. S. Negrisoli, M. S. Garcia, C. Dolinski and D. Bernardi	2013	Control of Grapholita molesta (Busck, 1916) (Lepidoptera: Tortricidae) with entomopathogenic nematodes (Rhabditida: Heterorhabditidae, Steinernematidae) in peach orchards	Experimental Parasitology	1	0	0	1	1	0	0	0	0	0	1	0	0	0	0	0	0	0	0	0	0	0	0	0	0	0	0	0	0	0	0	0	1	0	0	1
	F. J. A. Niederholzer, C. Pickel, R. P. Buchner, W. Olson, W. H. Krueger and F. G. Zalom	2013	Alternatives to Traditional Dormant-Season Plum Aphid Control Are Effective	X International Symposium on Plum and Prune Genetics, Breeding and Pomology	1	0	0	1	1	0	0	0	0	0	1	0	0	0	0	0	0	0	0	0	0	0	0	0	0	0	0	0	0	0	0	0	1	0	0	1
	M. Orozco-Santos, M. Robles-Gonzalez, L. M. Hernandez-Fuentes, J. J. Velazquez-Monreal, M. D. Bermudez-Guzman, M. Manzanilla-Ramirez, G. Manzo-Sanchez and D. Nieto-Angel	2016	Use of Oils and Plant Extracts to Control Diaphorina citri Kuwayama on Mexican Lime in the Dry Tropic of Mexico	Southwestern Entomologist	1	0	0	1	1	0	0	0	0	0	1	0	0	0	0	0	0	0	0	0	0	0	0	0	0	0	0	0	0	0	0	0	1	0	0	1
	J. C. Pinero, A. M. Agnello, A. Tuttle, T. C. Leskey, H. Faubert, G. Koehler, L. Los, G. Morin, K. Leahy, D. R. Cooley and R. J. Prokopy	2011	Effectiveness of Odor-Baited Trap Trees for Plum Curculio (Coleoptera: Curculionidae) Monitoring in Commercial Apple Orchards in the Northeast	Journal of Economic Entomology	1	0	0	1	1	0	0	0	0	0	1	0	0	0	0	0	0	0	0	0	0	0	0	0	0	0	0	0	0	0	0	0	1	0	0	1
	R. J. Prokopy and M. Christie	1992	STUDIES ON RELEASES OF MASS-REARED ORGANOPHOSPHATE RESISTANT AMBLYSEIUS-FALLACIS (GARM) PREDATORY MITES IN MASSACHUSETTS COMMERCIAL APPLE ORCHARDS	Journal of Applied Entomology-Zeitschrift Fur Angewandte Entomologie	1	0	0	1	1	0	0	0	0	0	1	0	0	0	0	0	0	0	0	0	0	0	0	0	0	0	0	0	0	0	0	0	1	0	0	1
	R. J. Prokopy, R. E. Mittenthal and S. E. Wright	2003	Evaluation of trap deployment patterns for behavioural control of apple maggot flies (Dipt., Tephritidae)	Journal of Applied Entomology-Zeitschrift Fur Angewandte Entomologie	1	0	0	1	1	0	0	0	0	0	1	0	0	0	0	0	0	0	0	0	0	0	0	0	0	0	0	0	0	0	0	0	1	0	0	1
	E. Quesada-Moraga, M. Yousef, A. Ortiz, M. Ruiz-Torres, I. Garrido-Jurado and A. Estevez	2013	Beauveria bassiana (Ascomycota: Hypocreales) Wound Dressing for the Control of Euzophera pinguis (Lepidoptera: Pyralidae)	Journal of Economic Entomology	1	0	0	1	1	0	0	0	0	0	0	1	0	0	0	0	0	0	0	0	0	0	0	0	0	0	0	0	0	0	0	0	1	0	0	1
	K. A. Quesada-Sojo and W. Rivera-Mendez	2016	Hirsutella as biological controller agent of mites and insects of agricultural importance	Tecnologia En Marcha	1	0	0	1	1	0	0	0	0	0	0	1	0	0	0	0	0	0	0	0	0	0	0	0	0	0	0	0	0	0	0	0	1	0	0	1
	W. H. Reissig, R. W. Weires, C. G. Forshey, W. L. Roelofs, R. C. Lamb, H. S. Aldwinckle and S. R. Alm	1984	MANAGEMENT OF THE APPLE MAGGOT, RHAGOLETIS-POMONELLA (WALSH) (DIPTERA, TEPHRITIDAE), IN DISEASE-RESISTANT DWARF AND SEMI-DWARF APPLE-TREES	Environmental Entomology	1	0	0	1	1	0	0	0	0	0	1	0	0	0	0	0	0	0	0	0	0	0	0	0	0	0	0	0	0	0	0	0	1	0	0	1
	W. H. Reissig, R. W. Weires, G. C. Forshey, W. L. Roelofs, R. C. Lamb and H. S. Aldwinckle	1984	INSECT MANAGEMENT IN DISEASE-RESISTANT DWARF AND SEMI-DWARF APPLE-TREES	Environmental Entomology	1	0	0	1	1	0	0	0	0	0	0	1	0	0	0	0	0	0	0	0	0	0	0	0	0	0	0	0	0	0	0	0	1	0	1	1
	J. Rull and R. J. Prokopy	2000	Attraction of apple maggot flies, Rhagoletis pomonella (Diptera : Tephritidae) of different physiological states to odour-baited traps in the presence and absence of food	Bulletin of Entomological Research	1	0	0	1	1	0	0	0	0	0	1	0	0	0	0	0	0	0	0	0	0	0	0	0	0	0	0	0	0	0	0	0	1	0	0	1
	J. Rull and R. J. Prokopy	2005	Interaction between natural and synthetic fruit odor influences response of apple maggot flies to visual traps	Entomologia Experimentalis Et Applicata	1	0	0	1	1	0	0	0	0	0	1	0	0	0	0	0	0	0	0	0	0	0	0	0	0	0	0	0	0	0	0	0	1	0	0	1
	D. Santoso, T. Chaidamsari, S. Wiryadiputra and R. A. de Maagd	2004	Activity of Bacillus thuringiensis toxins against cocoa pod borer larvae	Pest Management Science	1	0	0	1	1	0	0	0	0	0	1	0	0	0	0	0	0	0	0	0	0	0	0	0	0	0	0	0	0	0	0	0	1	0	0	1
	M. G. Solomon, M. A. Easterbrook and J. D. Fitz Gerald	1993	MITE-MANAGEMENT PROGRAMS BASED ON ORGANOPHOSPHATE-RESISTANT TYPHLODROMUS-PYRI IN UK APPLE ORCHARDS	Crop Protection	1	0	0	1	1	0	0	0	0	0	1	0	0	0	0	0	0	0	0	0	0	0	0	0	0	0	0	0	0	0	0	0	1	0	0	1
	R. J. Stuart, J. P. Michaud, L. Olsen and C. W. McCoy	2002	Lady beetles as potential predators of the root weevil Diaprepes abbreviatus (Coleoptera : Curculionidae) in Florida citrus	Florida Entomologist	1	0	0	1	1	0	0	0	0	0	1	0	0	0	0	0	0	0	0	0	0	0	0	0	0	0	0	0	0	0	0	0	1	0	0	1
	W. Warabieda	2015	The effect of methyl jasmonate and acibenzolar-S-methyl on the populations of the European red mite (Panonychus ulmi Koch) and Typhlodromus pyri Scheut. in apple orchards, as well as on the yield and growth of apple trees	International Journal of Acarology	1	0	0	1	1	0	0	0	0	0	1	0	0	0	0	0	0	0	0	0	0	0	0	0	0	0	0	0	0	0	0	0	1	0	0	1
	C. H. Wearing and J. A. de Boer	2014	Sampling of San Jose scale (Diaspidiotus perniciosus Hemiptera: Diaspididae) in an apple orchard	New Zealand Entomologist	1	0	0	1	1	0	0	0	0	0	1	0	0	0	0	0	0	0	0	0	0	0	0	0	0	0	0	0	0	0	0	0	1	0	0	1
	C. H. Wearing, R. R. Marshall, C. Colhoun and B. A. Attfield	2014	Phytophagous mites and their predators during the establishment of apple orchards under biological and integrated fruit production in Central Otago, New Zealand	New Zealand Journal of Crop and Horticultural Science	1	0	0	1	1	0	0	0	0	0	1	0	0	0	0	0	0	0	0	0	0	0	0	0	0	0	0	0	0	0	0	0	1	0	0	1
	F. G. Zalom, D. B. Walsh, W. Krueger and J. Connell	2002	Tolerance of peach twig borer, Anarsia lineatella Zeller, to organophosphate and pyrethroid insecticides	Proceedings of the 3rd International Symposium on Pistachios and Almonds	1	0	0	1	1	0	0	0	0	0	1	0	0	0	0	0	0	0	0	0	0	0	0	0	0	0	0	0	0	0	0	0	1	0	0	1
	A. M. Almeida, R. M. Souza, V. M. Gomes, T. D. Ferreira and V. Mussi-Dias	2013	FIELD ASSESSMENT OF MEAT AND BONE MEAL FOR MANAGEMENT OF GUAVA ORCHARDS AFFECTED BY GUAVA DECLINE	Nematropica	1	0	0	0	0	1	0	0	0	0	0	0	1	0	0	0	0	0	0	0	0	0	0	0	0	0	0	0	0	0	0	0	1	0	0	1
	A. M. Almeida, R. M. Souza, V. M. Gomes and G. B. Miranda	2012	Greenhouse and field assessment of different organic compounds against guava-parasitic Meloidogyne enterolobii	Bragantia	1	0	0	0	0	1	0	0	0	0	0	0	1	0	0	0	0	0	0	0	0	0	0	0	0	0	0	0	0	0	0	0	1	0	0	1
	A. Drenth and D. I. Guest	2016	Fungal and Oomycete Diseases of Tropical Tree Fruit Crops	Annual Review of Phytopathology, Vol 54	1	0	0	0	0	0	1	1	0	0	1	0	0	1	0	0	0	0	0	0	1	0	0	0	0	0	0	0	0	0	0	0	0	0	1	1
	O. A. Akinsanmi and A. Drenth	2010	Spatial pattern and the effects of climatic factors on husk spot disease in macadamia	Australasian Plant Pathology	1	0	0	0	0	0	1	0	0	0	0	0	0	1	0	0	0	0	0	0	0	0	0	0	0	0	0	1	0	0	0	0	1	0	0	1
	J. H. Connell	2002	Leading edge of plant protection for almond	Horttechnology	1	0	0	0	1	0	1	0	0	0	1	0	0	1	0	0	0	0	0	0	0	0	0	1	0	0	0	0	0	1	0	0	1	0	0	1
	D. Guest and P. Keane	2007	Vascular-streak dieback: A new encounter disease of cacao in Papua New Guinea and Southeast Asia caused by the obligate basidiomycete Oncobasidium theobromae	Phytopathology	1	0	0	0	0	0	1	0	0	0	1	0	0	0	0	0	0	1	0	0	0	0	0	1	0	0	1	0	0	0	0	0	1	0	0	1
	I. J. Holb	2005	Effect of pruning on apple scab in organic apple production	Plant Disease	1	0	0	0	0	0	1	0	0	0	1	0	0	0	0	0	0	0	0	0	0	0	0	1	0	0	0	0	0	0	0	0	0	0	0	1
	A. M. Al-Sadi, I. J. Al-Raisi, M. Al-Azri, H. Al-Hasani, M. S. Al-Shukaili, S. M. Al-Shuraiqi, K. O. Al-Fahdi and M. L. Deadman	2012	Population Structure and Management of Podosphaera pannosa Associated with Peach Powdery Mildew in Oman	Journal of Phytopathology	1	0	0	0	0	0	1	0	0	0	0	0	0	0	0	0	0	0	0	0	0	0	0	0	0	0	0	0	0	0	0	0	1	0	0	1
	Al-Yasiri, II, N. A. Saad, A. R. Nasser, S. A. Hassan and K. M. Zaid	2010	The Relationship between the Fungus Fusarium solani and Some Pathological Phenomena on Date Palm Trees and the Effectiveness of Some Systemic Fungicides for Their Control	Iv International Date Palm Conference	1	0	0	0	0	0	1	0	0	0	0	0	0	0	0	0	0	0	0	0	0	0	0	0	0	0	0	0	0	0	0	0	1	0	0	1
	T. Ayala-Silva, G. G. Gordon, R. Schnell and M. Winterstein	2012	Application of Propiconazole in Management of Laurel Wilt Disease in Avocado (Persea americana Mill.) Trees	I International Symposium on Wild Relatives of Subtropical and Temperate Fruit and Nut Crops	1	0	0	0	0	0	1	0	0	0	0	0	0	0	0	0	0	0	0	0	0	0	0	0	0	0	0	0	0	0	0	0	1	0	0	1
	A. M. Berrie and J. V. Cross	2000	Evaluation of integrated pest and disease management strategies for apple using disease resistant versus susceptible cultivars	Proceedings of the International Conference on Integrated Fruit Production	1	0	0	0	0	0	1	0	0	0	0	1	0	0	0	0	0	0	0	0	0	0	0	0	0	0	0	0	0	0	0	0	0	0	1	1
	T. Bubab, L. Foldes, A. Kormany, S. Hauptmann, G. Stammler and W. Rademacher	2003	Prohexadione-Ca in apple trees: Control of shoot growth and reduction of fire blight incidence in blossoms and shoots	Journal of Applied Botany-Angewandte Botanik	1	0	0	0	0	0	1	0	0	0	0	0	0	0	0	0	0	0	0	0	0	0	0	0	0	0	0	0	0	0	0	0	1	0	0	1
	R. Chiangsin, K. Wanichkul, D. I. Guest and S. Sangchote	2016	Reduction of anthracnose on ripened mango fruits by chemicals, fruit bagging, and postharvest treatments	Australasian Plant Pathology	1	0	0	0	0	0	1	0	0	0	0	1	1	0	0	0	0	0	0	0	0	0	0	0	0	0	0	0	0	0	0	0	1	0	0	1
	M. El Hassni, F. J'Aiti, A. Dihazi, E. Ait Barka, F. Daayf and I. El Hadrami	2004	Enhancement of defence responses against Bayoud disease by treatment of date palm seedlings with an hypoaggressive Fusarium oxysporum isolate	Journal of Phytopathology	1	0	0	0	0	0	1	0	0	0	0	1	0	0	0	0	0	0	0	0	0	0	0	0	0	0	0	0	0	0	0	0	1	0	0	1
	Y. Acebo-Guerrero, A. Hernandez-Rodriguez, M. Heydrich-Perez, M. El Jaziri and A. N. Hernandez-Lauzardo	2012	Management of black pod rot in cacao (Theobroma cacao L.): a review	Fruits	1	0	0	0	0	0	0	1	0	0	0	1	0	0	0	0	0	0	0	1	0	0	0	1	0	0	1	0	0	0	0	0	1	0	1	1
	D. Guest	2007	Black pod: Diverse pathogens with a global impact on cocoa yield	Phytopathology	1	0	0	0	0	0	0	1	0	0	1	0	0	0	0	0	0	0	0	0	0	0	0	1	0	0	1	0	0	0	0	0	1	0	0	1
	K. M. Al-Kindi, P. Kwan, N. R. Andrew and M. Welch	2017	Impacts of human-related practices on Ommatissus lybicus infestations of date palm in Oman	Plos One	1	0	0	0	1	0	0	0	0	0	1	0	0	0	0	0	0	0	0	0	0	0	0	0	1	0	1	0	0	0	0	0	0	0	0	1
	M. Aluja, J. Sivinski, R. Van Driesche, A. Anzures-Dadda and L. Guillen	2014	Pest management through tropical tree conservation	Biodiversity and Conservation	1	0	0	0	1	0	0	0	0	0	1	0	0	0	0	0	0	0	0	0	0	0	0	0	0	0	0	0	1	0	0	0	0	0	0	1
	R. Babin, G. M. T. Hoopen, C. Cilas, F. Enjalric, Yede, P. Gendre and J. P. Lumaret	2010	Impact of shade on the spatial distribution of Sahlbergella singularis in traditional cocoa agroforests	Agricultural and Forest Entomology	1	0	0	0	1	0	0	0	0	0	0	0	0	0	0	0	0	0	0	0	0	0	0	0	0	0	1	0	0	0	0	0	0	0	0	1
	V. H. Beloti, G. R. Rugno, M. R. Felippe, A. do Carmo-Uehara, L. F. Garbim, W. A. C. Godoy and P. T. Yamamoto	2013	POPULATION DYNAMICS OF DIAPHORINA CITRI KUWAYAMA (HEMIPTERA: LIVIIDAE) IN ORCHARDS OF 'VALENCIA' ORANGE, 'PONKAN' MANDARIN AND 'MURCOTT' TANGOR TREES	Florida Entomologist	1	0	0	0	1	0	0	0	0	0	1	0	0	0	0	0	1	0	0	0	0	0	0	0	0	0	0	0	0	0	0	0	0	0	0	1
	D. Guest	2002	Integrated management of Phytophthora diseases in tropical horticulture	Proceedings of the International Symposium on Tropical and Subtropical Fruits, Vols 1 and 2	1	0	0	0	1	0	0	0	0	0	1	0	0	0	0	0	0	0	0	0	0	0	0	0	0	0	0	0	0	0	0	1	0	0	0	1
	S. Stoeckli, K. Mody and S. Dorn	2008	Aphis pomi (Hemiptera : Aphididae) population development, shoot characteristics, and antibiosis resistance in different apple genotypes	Journal of Economic Entomology	1	0	0	0	1	0	0	0	0	0	1	0	0	0	0	0	0	0	0	1	0	0	0	0	0	0	0	0	0	0	0	0	0	0	0	1
	S. Abu-Romman and M. Ateyyat	2014	Phenotypic and Molecular Screening of Apple Genotypes to Woolly Apple Aphid Resistance	Notulae Botanicae Horti Agrobotanici Cluj-Napoca	1	0	0	0	1	0	0	0	0	0	0	0	0	0	0	0	0	0	0	0	0	0	0	0	0	0	0	0	0	0	0	0	0	0	1	1
	N. M. N. Al-Dosary, S. Al-Dobai and J. R. Faleiro	2016	Review on the management of red palm weevil Rhynchophorus ferrugineus olivier in date palm Phoenix dactylifera L	Emirates Journal of Food and Agriculture	1	0	0	0	1	0	0	0	0	0	0	0	0	1	0	0	0	0	0	0	0	0	0	0	0	0	0	0	0	0	0	0	0	0	0	1
	M. Aluja, J. Arredondo, F. Diaz-Fleischer, A. Birke, J. Rull, J. Niogret and N. Epsky	2014	Susceptibility of 15 Mango (Sapindales: Anacardiaceae) Cultivars to the Attack by Anastrepha ludens and Anastrepha obliqua (Diptera: Tephritidae) and the Role of Underdeveloped Fruit as Pest Reservoirs: Management Implications	Journal of Economic Entomology	1	0	0	0	1	0	0	0	0	0	1	1	0	0	0	0	0	0	0	0	0	0	0	0	0	0	0	0	0	0	0	0	0	0	1	1
	A. A. Atwa and E. M. Hegazi	2014	Comparative Susceptibilities of Different Life Stages of the Red Palm Weevil (Coleoptera: Curculionidae) Treated by Entomopathogenic Nematodes	Journal of Economic Entomology	1	0	0	0	1	0	0	0	0	0	0	0	0	0	0	0	0	0	0	0	0	0	0	0	0	0	0	0	0	0	0	0	1	0	0	1
	T. Baicu	1992	SITUATION OF INTEGRATED PEST-MANAGEMENT IN THE ORCHARDS IN IOBC EPS COUNTRIES	Acta Phytopathologica Et Entomologica Hungarica	1	0	0	0	1	0	0	0	0	0	0	0	0	0	0	0	0	0	0	0	0	0	0	0	0	0	0	0	0	0	0	0	0	0	0	1
	D. J. Biddinger, T. W. Leslie and N. K. Joshi	2014	Reduced-Risk Pest Management Programs for Eastern US Peach Orchards: Effects on Arthropod Predators, Parasitoids, and Select Pests	Journal of Economic Entomology	1	0	0	0	0	0	0	0	0	0	1	0	0	0	0	0	0	0	0	0	0	0	0	0	0	0	0	0	0	0	0	0	1	0	0	1
	H. Bunescu, I. Ghizdavu, G. Mihai, I. Oltean, M. Porca and I. Bodis	2002	The control of pests from orchard ecosystems by unchemical methods	Bulletin of the University of Agricultural Sciences and Veterinary Medicine, Vol 57	1	0	0	0	0	0	0	0	0	0	0	0	0	0	0	0	0	0	0	0	0	0	0	0	0	0	0	0	0	0	0	0	0	0	0	1
	F. J. Byrne, E. C. Humeres, A. A. Urena, M. S. Noddle and J. G. Morse	2010	Field evaluation of systemic imidacloprid for the management of avocado thrips and avocado lace bug in California avocado groves	Pest Management Science	1	0	0	0	1	0	0	0	0	0	0	1	0	0	0	0	0	0	0	0	0	0	0	0	0	0	0	0	0	0	0	0	1	0	0	1
	F. J. Byrne, A. A. Urena, L. J. Robinson, R. I. Krieger, J. Doccola and J. G. Morse	2012	Evaluation of neonicotinoid, organophosphate and avermectin trunk injections for the management of avocado thrips in California avocado groves	Pest Management Science	1	0	0	0	1	0	0	0	0	0	0	1	0	0	0	0	0	0	0	0	0	0	0	0	0	0	0	0	0	0	0	0	1	0	0	1
	S. Civolani, R. Peretto, L. Caroli, E. Pasqualini, M. Chicca and M. Leis	2007	Preliminary resistance screening on abamectin in pear psylla (Hemiptera : Psyllidae) in northern Italy	Journal of Economic Entomology	1	0	0	0	1	0	0	0	0	0	1	0	0	0	0	0	0	0	0	0	0	0	0	0	0	0	0	0	0	0	0	0	1	0	0	1
	H. A. F. El-Shafie, J. R. Faleiro, A. H. Al-Abbad, L. Stoltman and A. Mafra-Neto	2011	BAIT-FREE ATTRACT AND KILL TECHNOLOGY (HOOK (TM) RPW) TO SUPPRESS RED PALM WEEVIL, RHYNCHOPHORUS FERRUGINEUS (COLEOPTERA: CURCULIONIDAE) IN DATE PALM	Florida Entomologist	1	0	0	0	1	0	0	0	0	0	1	0	0	0	0	0	0	0	0	0	0	0	0	0	0	0	0	0	0	0	0	0	1	0	0	1
	J. Ellington, T. Carrillo and J. Drake	2003	Pecan integrated biological control	Southwestern Entomologist	1	0	0	0	0	0	0	0	0	0	0	0	0	0	0	0	0	0	0	0	0	0	0	0	0	0	0	0	0	0	0	0	0	0	0	1
	M. M. Fernandez, L. Guitter, A. Bellahirech and A. Comte	2009	Means to Preserve Beneficial Arthropod Populations in French Hazelnut Orchards as Part of an Integrated Pest Management Approach	Vii International Congress on Hazelnut	1	0	0	0	0	0	0	0	0	0	0	1	0	0	0	0	0	0	0	0	0	0	0	0	0	0	0	0	0	0	0	0	1	0	0	1
	M. Ferry and S. Gomez	2014	Assessment of risks and potential of injection techniques in integrated programs to eradicate the red palm weevil: review and new perspectives	Fruits	1	0	0	0	1	0	0	0	0	0	0	0	1	0	0	0	0	0	0	0	0	0	0	0	0	0	0	0	0	0	0	0	1	0	0	1
	M. E. Garcia, L. P. Berkett and T. Bradshaw	2004	First year results of the impact of a novel pest management technology on apple fruit quality	Sustainability of Horticultural Systems in the 21st Century	1	0	0	0	0	0	0	0	0	0	1	0	0	0	0	0	0	0	0	0	0	0	0	0	0	0	0	0	0	0	0	0	1	0	0	1
	T. Panagopoulos, J. Jesus and P. Universidade Fernando	2007	Integrating Geographic Information Systems and Geostatistics for Pest Management in Olive Orchards	Novas Perspectivas Em Sistemas E Tecnologias De Informacao, Vol Ii	1	0	0	0	0	0	0	0	0	0	0	0	0	0	0	0	0	0	0	0	0	0	0	0	0	0	0	0	0	0	0	0	0	0	0	1
	O. B. Kovanci, N. A. Kumral and T. E. Larsen	2010	High versus ultra-low volume spraying of a microencapsulated pheromone formulation for codling moth control in two apple cultivars	International Journal of Pest Management	1	0	1	0	0	0	0	0	0	0	0	0	0	0	0	0	0	0	0	0	0	0	0	0	0	0	0	0	0	0	0	0	1	0	0	1
	L. Rimbaud, S. Dallot, T. Gottwald, V. Decroocq, E. Jacquot, S. Soubeyrand and G. Thebaud	2015	Sharka Epidemiology and Worldwide Management Strategies: Learning Lessons to Optimize Disease Control in Perennial Plants	Annual Review of Phytopathology, Vol 53	1	0	0	1	0	0	0	0	1	0	1	0	0	0	0	0	0	0	0	0	0	0	0	1	0	0	0	0	0	0	0	0	0	0	1	1
	G. A. Ameyaw, H. K. Dzahini-Obiatey and O. Domfeh	2014	Perspectives on cocoa swollen shoot virus disease (CSSVD) management in Ghana	Crop Protection	1	0	0	0	0	0	0	0	1	0	0	0	0	1	0	0	0	0	0	0	0	0	0	1	0	0	0	0	0	0	0	0	0	0	0	1
	G. A. Ameyaw, H. K. Dzahini-Obiatey, O. Domfeh, F. K. Oppong and K. Abaka-Ewusie	2015	History and data analyses of 'cutting out' method for Cocoa swollen shoot virus disease (CSSVD) control in Ghana	Journal of Plant Diseases and Protection	1	0	0	0	0	0	0	0	1	0	0	0	0	1	0	0	0	0	0	0	0	0	0	1	0	0	0	0	0	0	0	0	0	0	0	1
	C. Andres, A. Gattinger, H. K. Dzahini-Obiatey, W. J. Blaser, S. K. Offei and J. Six	2017	Combatting Cocoa Swollen Shoot Virus Disease: What do we know?	Crop Protection	1	0	0	0	0	0	0	0	1	0	0	1	0	1	0	0	0	0	0	0	1	0	0	0	0	0	1	0	0	0	0	0	0	0	1	1
	O. Domfeh, G. A. Ameyaw, H. K. Dzahini-Obiatey, L. A. A. Ollennu, K. Osei-Bonsu, K. Acheampong, F. Aneani and F. Owusu-Ansah	2016	Use of Immune Crops as Barrier in the Management of Cacao Swollen Shoot Virus Disease (CSSVD)-Long-Term Assessment	Plant Disease	1	0	0	0	0	0	0	0	1	0	1	0	0	1	0	0	0	0	0	0	1	0	0	0	0	0	0	0	0	0	0	0	0	0	0	1
	S. Atta, C. Y. Zhou, Y. Zhou, M. J. Cao and X. F. Wang	2012	Distribution and Research Advances of Citrus tristeza virus	Journal of Integrative Agriculture	1	0	0	0	0	0	0	0	1	0	0	1	0	0	0	0	0	0	0	0	0	0	0	0	0	0	0	0	0	0	0	0	0	0	1	1
	K. Eljounaidi, S. K. Lee and H. Bae	2016	Bacterial endophytes as potential biocontrol agents of vascular wilt diseases - Review and future prospects	Biological Control	0	0	0	1	0	0	1	0	0	1	0	1	0	0	0	0	0	0	0	0	0	0	0	0	0	0	0	0	0	0	0	0	1	0	1	1
	K. Hasey, D. A. Kluepfel and K. K. Anderson	2014	Crown Gall Incidence and Severity: Seedling Walnut Rootstock versus Clonally Propagated Rootstock	Vii International Walnut Symposium	0	0	0	1	0	0	0	0	0	1	0	1	0	0	0	0	0	0	0	0	0	0	0	0	0	0	0	0	0	0	0	0	0	0	1	1
	J. K. Nagy, L. Kiraly and S. Ildiko	2012	Phage therapy for plant disease control with a focus on fire blight	Central European Journal of Biology	0	0	0	1	0	0	0	0	0	1	1	0	0	0	0	0	0	0	0	0	0	0	0	0	0	0	0	0	0	0	0	0	1	0	0	1
	M. Scortichini and R. Liguori	2003	Integrated management of bacterial decline of hazelnut, by using Bion as an activator of systemic acquired resistance (SAR)	Pseudomonas Syringae and Related Pathogens: Biology and Genetics	0	0	0	1	0	0	0	0	0	1	1	0	0	0	0	0	0	0	0	0	0	0	0	0	0	0	0	0	0	0	0	0	1	0	0	1
	M. M. Jamadar, A. R. Sataraddi, P. V. Patil, R. S. Jawadagi and D. R. Patil	2011	Status of Pomegranate Diseases of Northern Karnataka in India	Ii International Symposium on Pomegranate and Minor - Including Mediterranean - Fruits: Ispmmf2009	1	0	0	1	0	1	1	0	0	1	1	0	0	0	0	0	0	0	0	0	0	0	0	1	0	0	1	0	0	0	0	0	1	0	0	1
	J. A. Tansey, P. Vanaclocha, C. Monzo, M. Jones and P. A. Stansly	2017	Costs and benefits of insecticide and foliar nutrient applications to huanglongbing-infected citrus trees	Pest Management Science	1	0	0	1	1	0	0	0	0	1	1	0	0	0	0	0	0	0	0	0	0	0	0	0	0	0	0	1	0	0	0	0	1	0	0	1
	R. B. Bassanezi, J. Belasque and L. H. Montesino	2013	Frequency of symptomatic trees removal in small citrus blocks on citrus huanglongbing epidemics	Crop Protection	1	0	0	1	0	0	0	0	0	1	0	0	0	1	0	0	0	0	0	0	0	0	0	1	0	0	0	0	0	0	0	0	0	0	0	1
	R. B. Bassanezi, L. H. Montesino, N. Gimenes-Fernandes, P. T. Yamamoto, T. R. Gottwald, L. Amorim and A. Bergamin	2013	Efficacy of Area-Wide Inoculum Reduction and Vector Control on Temporal Progress of Huanglongbing in Young Sweet Orange Plantings	Plant Disease	1	0	0	1	0	0	0	0	0	1	0	0	0	1	0	0	0	0	0	0	0	0	0	1	0	0	0	0	0	0	0	0	1	0	0	1
	J. M. Bove	2012	HUANGLONGBING AND THE FUTURE OF CITRUS IN SAO PAULO STATE, BRAZIL	Journal of Plant Pathology	1	0	0	1	0	0	0	0	0	1	0	1	0	0	0	0	0	0	1	0	0	0	0	1	0	0	0	0	0	0	0	0	1	0	0	1
	E. A. Evans, F. H. Ballen and J. H. Crane	2014	Economic Potential of Producing Tahiti Limes in Southern Florida in the Presence of Citrus Canker and Citrus Greening	Horttechnology	1	0	0	1	0	0	0	0	0	1	1	1	0	0	0	0	0	0	0	0	0	0	0	1	0	0	0	0	0	0	0	0	1	0	0	1
	T. R. Gottwald, D. G. Hall, A. B. Kriss, E. J. Salinas, P. E. Parker, G. A. C. Beattie and M. C. Nguyen	2014	Orchard and nursery dynamics of the effect of interplanting citrus with guava for huanglongbing, vector, and disease management	Crop Protection	1	0	0	1	0	0	0	0	0	1	1	0	0	0	0	0	0	0	0	0	1	0	0	0	0	0	0	0	0	0	0	0	0	0	0	1
	J. H. Graham and M. E. Myers	2013	Integration of soil applied neonicotinoid insecticides and acibenzolar-S-methyl for systemic acquired resistance (SAR) control of citrus canker on young citrus trees	Crop Protection	1	0	0	1	0	0	0	0	0	1	1	0	0	0	0	0	0	0	0	0	0	0	0	0	0	0	0	1	0	0	0	0	1	0	0	1
	K. Ichinose, N. V. Hoa, D. V. Bang, D. H. Tuan and L. Q. Dien	2012	Limited efficacy of guava interplanting on citrus greening disease: Effectiveness of protection against disease invasion breaks down after one year	Crop Protection	1	0	0	1	0	0	0	0	0	1	1	0	0	0	0	0	0	0	0	0	1	0	0	0	0	0	0	0	0	0	0	0	1	0	0	1
	J. M. Khairil and M. M. Munzir	2014	Experiences in Managing Bacterial Dieback Disease of Papaya in Malaysia	Iii International Symposium on Papaya	1	0	0	1	0	0	0	0	0	1	1	0	1	0	0	0	0	0	0	0	0	0	0	1	0	0	0	0	0	0	0	0	1	0	0	1
	K. T. Morgan, R. E. Rouse and R. C. Ebel	2016	Foliar Applications of Essential Nutrients on Growth and Yield of 'Valencia' Sweet Orange Infected with Huanglongbing	Hortscience	1	0	0	1	0	0	0	0	0	1	0	0	1	0	0	1	0	0	0	0	0	0	0	0	0	0	0	0	0	0	0	0	0	0	0	1
	J. Nemeth	1999	Occurrence and spread of fire blight (Erwinia amylovora) in Hungary (1996-1998). Management of the disease	Proceedings of the Eighth International Workshop on Fire Blight	1	0	0	1	0	0	0	0	0	1	1	0	0	0	0	0	0	0	0	0	0	0	0	1	0	0	0	0	0	0	0	0	0	0	0	1
	H. K. Ngugi and J. R. Schupp	2009	Evaluation of the Risk of Spreading Fire Blight in Apple Orchards with a Mechanical String Blossom Thinner	Hortscience	1	0	0	1	0	0	0	0	0	1	1	0	0	0	1	0	0	0	0	0	0	0	0	0	0	0	1	0	0	0	0	0	0	0	0	1
	D. Shtienberg, M. Zilberstaine, D. Oppenheim, S. Levi, H. Shwartz and G. Kritzman	2003	New considerations for pruning in management of fire blight in pears	Plant Disease	1	0	0	1	0	0	0	0	0	1	0	0	1	0	0	0	0	0	0	0	0	0	0	1	0	0	0	0	0	0	0	0	0	0	0	1
	V. Toussaint and V. Philion	2008	Natural epidemic of fire blight in a newly planted orchard and effect of pruning on disease development	Proceedings of the Eleventh International Workshop on Fire Blight	1	0	0	1	0	0	0	0	0	1	0	0	1	0	1	0	0	0	0	0	0	0	0	1	0	0	0	0	0	0	0	0	0	0	0	1
	K. Yuasa, N. V. Hoa, N. M. Chau and K. Ichinose	2016	Improvement of 'King' mandarin (Citrus nobilis) cultivation techniques in southern Vietnam	Xxix International Horticultural Congress on Horticulture: Sustaining Lives, Livelihoods and Landscapes	1	0	0	1	0	0	0	0	0	1	1	0	0	0	0	0	0	0	0	1	0	0	0	0	0	0	1	0	0	0	0	0	0	0	0	1
	K. Yuasa, H. N. Van and K. Ichinose	2015	Reduction of Huanglongbing Due to the 'Appropriate Techniques Expansion for the Cultivation of King Mandarin' Project in Southern Vietnam	Xii International Citrus Congress - International Society of Citriculture	1	0	0	1	0	0	0	0	0	1	1	0	0	0	0	0	0	0	0	0	1	0	0	0	0	0	0	0	0	0	0	0	1	0	0	1
	M. Altindag, M. Sahin, A. Esitken, S. Ercisli, M. Guleryuz, M. F. Donmez and F. Sahin	2006	Biological control of brown rot (Moniliana laxa Ehr.) on apricot (Prunus armeniaca L. cv. Hacihaliloglu) by Bacillus, Burkholdria, and Pseudomonas application under in vitro and in vivo conditions	Biological Control	1	0	0	1	0	0	0	0	0	1	0	1	0	0	0	0	0	0	0	0	0	0	0	0	0	0	0	0	0	0	0	0	1	0	0	1
	K. K. Bastas and S. Maden	2007	Evaluation of host resistance inducers and conventional products for fire blight management in loquat and quince	Phytoprotection	1	0	0	1	0	0	0	0	0	1	0	1	0	0	0	0	0	0	0	0	0	0	0	0	0	0	0	0	0	0	0	0	1	0	0	1
	F. Behlau, J. Belasque, J. H. Graham and R. P. Leite	2010	Effect of frequency of copper applications on control of citrus canker and the yield of young bearing sweet orange trees	Crop Protection	1	0	0	1	0	0	0	0	0	1	0	0	1	0	0	0	0	0	0	0	0	0	0	0	0	0	0	0	0	0	0	0	1	0	0	1
	S. D. Croxton and P. A. Stansly	2014	Metalized polyethylene mulch to repel Asian citrus psyllid, slow spread of huanglongbing and improve growth of new citrus plantings	Pest Management Science	1	0	0	1	0	0	0	0	0	1	1	0	0	0	0	0	0	0	0	0	0	0	0	0	0	0	0	0	0	0	0	0	1	0	0	1
	Y. Evrenosoglu, A. Misirli, H. Saygili, E. Bilen, O. Boztepe and N. Acarsoy	2011	Evaluation of Susceptibility of Different Pear Hybrid Populations to Fire Blight (Erwinia amylovora)	Notulae Botanicae Horti Agrobotanici Cluj-Napoca	1	0	0	1	0	0	0	0	0	1	0	1	0	0	0	0	0	0	0	0	0	0	0	0	0	0	0	0	0	0	0	0	0	0	1	1
	T. R. Gottwald, J. H. Graham, M. S. Irey, T. G. McCollum and B. W. Wood	2012	Inconsequential effect of nutritional treatments on huanglongbing control, fruit quality, bacterial titer and disease progress	Crop Protection	1	0	0	1	0	0	0	0	0	1	1	0	0	0	0	0	0	0	0	0	0	0	0	0	0	0	0	0	0	0	0	0	1	0	0	1
	D. G. Hall, T. R. Gottwald, E. Stover and G. A. C. Beattie	2013	Evaluation of Management Programs for Protecting Young Citrus Plantings from Huanglongbing	Hortscience	1	0	0	1	0	0	0	0	0	1	1	0	0	0	0	0	0	0	0	0	0	0	0	0	0	0	0	0	0	0	0	0	1	0	0	1
	J. H. Hu and N. A. Wang	2016	Evaluation of the Spatiotemporal Dynamics of Oxytetracycline and Its Control Effect Against Citrus Huanglongbing via Trunk Injection	Phytopathology	1	0	0	1	0	0	0	0	0	1	0	1	0	0	0	0	0	0	0	0	0	0	0	0	0	0	0	0	0	0	0	0	1	0	0	1
	S. E. Lindow, B. A. Holtz and R. E. Elkins	2008	Improved biological control of fire blight of pear and apple by introduction of antagonistic bacteria into unopened flowers	Proceedings of the Eleventh International Workshop on Fire Blight	1	0	0	1	0	0	0	0	0	1	1	0	0	0	0	0	0	0	0	0	0	0	0	0	0	0	0	0	0	0	0	0	1	0	0	1
	E. Llorens, B. Vicedo, M. M. Lopez, L. Lapena, J. H. Graham and P. Garcia-Agustin	2015	Induced resistance in sweet orange against Xanthomonas citri subsp citri by hexanoic acid	Crop Protection	1	0	0	1	0	0	0	0	0	1	0	1	0	0	0	0	0	0	0	0	0	0	0	0	0	0	0	0	0	0	0	0	1	0	0	1
	K. L. Maxson and A. L. Jones	2002	Management of fire blight with gibberellin inhibitors and SAR inducers	Proceedings of the Ixth International Workshop on Fire Blight	1	0	0	1	0	0	0	0	0	1	0	1	0	0	0	0	0	0	0	0	0	0	0	0	0	0	0	0	0	0	0	0	1	0	0	1
	C. Monzo, J. A. Qureshi and P. A. Stansly	2014	Insecticide sprays, natural enemy assemblages and predation on Asian citrus psyllid, Diaphorina citri (Hemiptera: Psyllidae)	Bulletin of Entomological Research	1	0	0	1	0	0	0	0	0	1	1	0	0	0	0	0	0	0	0	0	0	0	0	0	0	0	0	0	0	0	0	0	1	0	0	1
	H. K. Ngugi, B. L. Lehman and L. V. Madden	2011	Multiple Treatment Meta-Analysis of Products Evaluated for Control of Fire Blight in the Eastern United States	Phytopathology	1	0	0	1	0	0	0	0	0	1	1	0	0	0	0	0	0	0	0	0	0	0	0	0	0	0	0	0	0	0	0	0	1	0	0	1
	H. Ozaktan, A. Akkopru, E. Aslan, K. Ilhan and T. Koltuksuz	2011	Integrated Control of Fire Blight in a Pear Orchard in Turkey Using Prohexadione-Ca and Bacterial Antagonists	Xii International Workshop on Fire Blight	1	0	0	1	0	0	0	0	0	1	1	0	0	0	0	0	0	0	0	0	0	0	0	0	0	0	0	0	0	0	0	0	1	0	0	1
	J. M. Quesada, R. Penyalver, J. Perez-Panades, C. I. Salcedo, E. A. Carbonell and M. M. Lopez	2010	Comparison of chemical treatments for reducing epiphytic Pseudomonas savastanoi pv. savastanoi populations and for improving subsequent control of olive knot disease	Crop Protection	1	0	0	1	0	0	0	0	0	1	1	0	0	0	0	0	0	0	0	0	0	0	0	0	0	0	0	0	0	0	0	0	1	0	0	1
	W. S. Shen, J. M. Cevallos-Cevallos, U. N. da Rocha, H. A. Arevalo, P. A. Stansly, P. D. Roberts and A. H. C. van Bruggen	2013	Relation between plant nutrition, hormones, insecticide applications, bacterial endophytes, and Candidatus Liberibacter Ct values in citrus trees infected with Huanglongbing	European Journal of Plant Pathology	1	0	0	1	0	0	0	0	0	1	0	1	0	0	0	0	0	0	0	0	0	0	0	0	0	0	0	0	0	0	0	0	1	0	0	1
	V. O. Stockwell, K. B. Johnson, D. Sugar and J. E. Loper	2002	Antibiosis contributes to biological control of fire blight by Pantoea agglomerans strain Eh252 in orchards	Phytopathology	1	0	0	1	0	0	0	0	0	1	0	1	0	0	0	0	0	0	0	0	0	0	0	0	0	0	0	0	0	0	0	0	1	0	0	1
	E. D. Ammar, D. G. Hall and J. M. Alvarez	2015	Effect of Cyantraniliprole, a Novel Insecticide, on the Inoculation of Candidatus Liberibacter Asiaticus Associated with Citrus Huanglongbing by the Asian Citrus Psyllid (Hemiptera: Liviidae)	Journal of Economic Entomology	1	0	0	0	0	0	0	0	0	1	0	0	0	0	0	0	0	0	0	0	0	0	0	0	0	0	0	1	0	0	0	0	1	0	0	1
	J. Belasque, R. B. Bassanezi, P. T. Yamamoto, A. J. Ayres, A. Tachibana, A. R. Violante, A. Tank, F. Di Giorgi, F. E. A. Tersi, G. M. Menezes, J. Dragone, R. H. Jank and J. M. Bove	2010	LESSONS FROM HUANGLONGBING MANAGEMENT IN SAO PAULO STATE, BRAZIL	Journal of Plant Pathology	1	0	0	0	0	0	0	0	0	1	0	0	0	1	0	0	0	0	0	0	0	0	0	1	0	0	0	0	0	0	0	0	0	0	0	1
	D. F. Lopez-Bravo, E. D. Virginio and J. Avelino	2012	Shade is conducive to coffee rust as compared to full sun exposure under standardized fruit load conditions	Crop Protection	1	0	0	0	0	0	0	0	0	1	0	0	1	0	0	0	0	0	0	0	0	0	0	1	0	0	0	0	0	0	0	0	0	0	0	1
	S. G. Acimovic, Q. Zeng, G. C. McGhee, G. W. Sundin and J. C. Wise	2015	Control of fire blight (Erwinia amylovora) on apple trees with trunk-injected plant resistance inducers and antibiotics and assessment of induction of pathogenesis-related protein genes	Frontiers in Plant Science	1	0	0	0	0	0	0	0	0	1	0	0	0	0	0	0	0	0	0	0	0	0	0	0	0	0	0	0	0	0	0	0	1	0	0	1
	T. Z. Bagio, M. G. Canteri, T. P. Barreto and R. P. Leite	2016	Activation of systemic acquired resistance in citrus to control huanglongbing disease	Semina-Ciencias Agrarias	1	0	0	0	0	0	0	0	0	1	0	1	0	0	0	0	0	0	0	0	0	0	0	0	0	0	0	0	0	0	0	0	1	0	0	1
	F. M. Cazorla, E. Arrebola, F. Olea, L. Velasco, J. M. Hermoso, A. Perez-Garcia, J. A. Tores, J. M. Farre and A. deVicente	2006	Field evaluation of treatments for the control of the bacterial apical necrosis of mango (Mangifera indica) caused by Pseudomonas syringae pv. syringae	European Journal of Plant Pathology	1	0	0	0	0	0	0	0	0	1	1	0	0	0	0	0	0	0	0	0	0	0	0	0	0	0	0	0	0	0	0	0	1	0	0	1
	J. A. Gutierrez-Barranquero, E. Arrebola, N. Bonilla, D. Sarmiento, F. M. Cazorla and A. de Vicente	2012	Environmentally friendly treatment alternatives to Bordeaux mixture for controlling bacterial apical necrosis (BAN) of mango	Plant Pathology	1	0	0	0	0	0	0	0	0	1	1	1	0	0	0	0	0	0	0	0	0	0	0	0	0	0	0	0	0	0	0	0	1	0	0	1
	S. M. White, J. M. Bullock, D. A. P. Hooftman and D. S. Chapman	2017	Modelling the spread and control of Xylella fastidiosa in the early stages of invasion in Apulia, Italy	Biological Invasions	1	0	1	1	0	0	0	0	0	1	0	0	0	1	0	0	0	0	0	0	0	0	0	0	0	0	0	0	0	0	0	0	0	0	0	1
	M. M. Leinfelder and I. A. Merwin	2006	Rootstock selection, preplant soil treatments, and tree planting positions as factors in managing apple replant diseas	Hortscience	1	0	0	1	0	1	1	1	1	1	1	0	0	0	0	0	0	0	0	0	0	0	0	0	0	0	0	0	0	1	0	0	1	0	1	1
	M. M. Bos, I. Steffan-Dewenter and T. Tscharntke	2007	Shade tree management affects fruit abortion, insect pests and pathogens of cacao	Agriculture Ecosystems & Environment	1	0	0	0	1	0	0	0	1	1	0	0	0	0	0	0	0	0	0	0	1	0	0	0	0	0	0	0	0	0	0	0	0	0	0	1
