# Supplementary material
Source: Frontiers journal article supplement (https://www.frontiersin.org/articles/480727)
Supplement: Table_4.XLSX [file Table_4.XLSX]

## Sheet: empirical_studies
Data extraction from papers which meet inclusion criteria. 114 papers considered, 9 papers with low reliability or applicability later removed from analysis. Defintions for treatment codes, effects codes and reliability applicability codes found in associated sheets.
paper_code	paper_type	system	pathogen	design	plot_size	study_area	control	management	findings	reliability_applicability	Treatment	treatment_code	Pathogen	exposure_risk	exposure_risk_effect	resistance	resistance_effect	recovery	recovery_effect	spread_risk	spread_risk_effect	mechanism	Effect modifier	Comments
amorini2000	Case study	Chestnut coppice - Italy (med)	Cryphonectria parasitica (fungi)	Statistical regression, correlative.	0.5ha	0.5ha	None	Thinning - 50% at age 17, with medium thinning (46% trees and 34% basal area) at age 35. Third thinning at age 42 simulated.	Before second thinning 87% show disease, but limited dieback. 58% of shoots with disease showed recovery. Following second thinning shoots showing disease fell by 6%, and 68% of those infected show healing. Two years after thinning 94% of shoots diseased, but no dieback, and 74% of diseased show healing. Disease incidence inversely related to size and social role (higher in small suppressed trees…	2	Thinning	14	chestnut blight	NA	0	Gen reduced	4	Gen increased	2	NA	0	Not clear	Tree size/dominance	Healing
baleshta2005	Experiment	Douglas fir plantations, with paper birch. British Colombia, Canada	Armillaria root rot - Armillaria ostoyae (fungi)	Experiment - between site comparisons	0.25ha, including 0.09ha buffer amnd 10m from next plot.	4 sites.	Paper birch density of >7000 stems/ha	10-15 years old plantations. 4 treatments, paper birch thinned to 4444stems/ha, 1111stems/ha 400 stems/ha, 0 stems/ha. Doulgas fir mean density 1190 stems/ha. Paper birch chosen for retention based on: (co)dominant crown, uniform spacing, single, stright stem, seed origin.	Doulgas fir survival did not vary between thinning treatments after 2 years, but mortality due to A. ostoyae did increase with increased birch thinning.	3	Thinning	14	Armillaria root rot	NA	0	Reduced	5	NA	0	NA	0	Not clear	Tree species (reduced in birch, no effect in DF)
bauman2014	Experiment	Chestnut plantations - North America (Appalachian region). Re-planting on former mined areas.	Chestnut blight (fungi)	Experiment - between site comparisons	3 blocks of 117x40m, treatment areas of 18x36m	3 blocks, unclear over what area.	No management	Soil preparation before planting of cross ripping, plow and disk, or combination of the two. Three seedling types (one pure, two bred for resistance). Fertiliser, weed mats, herbicide, and protection from browsing was also used.	Survival did not vary between plots in first growing season. After 5 years highest survival in ripped and combined treatment plots (77-81%) and lowest in plow and disk (70%) and control (21%). Survival of resistant seedlings was higher than pure after two years. Pure seedlings more infected in ripped and combined treatments than others, and more than resistant seedlings in all treatments. Very lo…	3	Site (soil) prep. treatments.	26	chestnut blight	NA	0	Increased	1	NA	0	NA	0	Not clear	Species ID: Genotype: Resistant seedling genotypes
begley2009	Experiment	Willow plantation, Northern Ireland	Melampsora epitea (rust)	Experiment - between plot comparisons	10x10m plots for single genotype, 10x20m for 2 and 3 way mixture, 30x20m for 7 way mixture	14 plots within single area. Distance between plots unknown	Monoclonal stand	Salix viminalis genotypes planted in 2, 3 or 7 way mixtures.	Yeild after the first 3 year growing season was lower in monoculture plots compared to mixtures, with the exception of the 7 way mixture. This difference did not persist to the second harvest.	3	Species mixture: clones	2	Rust, Melampsora epitea (fungi)	NA	0	NA	0	Increased	1	NA	0	Not clear	None
beh2012	Case study	Coastal forests - California (med)	Sudden Oak Death Phytophthora ramorum (oomycyte)	Statistical regression, correlative.	280 plots of 500m2. 45 plots focus of fire study	Across Big Sur ecoregion	NA	Fire (naturally occuring)	Pathogen recovered from 18/45 plots 2 years after burning, lower than expected, and explained best by burn status, and number of pre-burn laurels remaining on plot. Pathogen was suppressed, but not eradicated, and in some plots had returned to high levels within 2 years. Lowest pathogen recovery with highest burn severity. Heat from fire not expected to kill pathogen, and can persist in tissues o…	4	Burning: Fire (natural)	18	P. ramorum	NA	0	Decreased short term	4	NA	0	NA	0	Pathogen directly reduced by fire	Number of pre-fire symptomatic bay laurels	Main result is pathogen survival of burn, as determined by presence in vegetation (linked to host mortality)
benedict1981	Case study	Pine forests North America	White pine blister rust	Narrative of management	NA	USA	NA	Quarentine. Tracking infected shipments and eradicating infected trees on site. Removal of alternative hosts (Ribes) in natural forests and nurseries.	Not successful, disease latent therefore not detected before spread. Ribes could not be eradicated, very successful native.	1	Co-host - Ribes removal	3	White pine blister rust	NA	0	NA	0	NA	0	No effect	3	Not clear	None
bergdahl2002	Case study	Hardwood forest, Vermont. Focused on sugar maple.	Annual canker Fusarium sp (fungi)	Statistical regression, correlative.	1/5ac circular plots, 73 across landscape (68 retained for analysis as containing sugar maple).	635ac	None	Natural variation.	Mean incidence of canker 25% (0-67%). Symptoms on trees 2-16in, with 93% in 2-9in class. Possibility of recovery in older trees. Increases in both tree density and sugar maple density increased incidence of canker. Less canker in softwoods and mixed woods when compared to maple-beech-birch forests.	3	Species mixture (of softwoods and hardwoods)	2	Fusarium canker	NA	0	Increased	1	NA	0	NA	0	Not clear	Tree density
bergdahl2002	Case study	Hardwood forest, Vermont. Focused on sugar maple.	Annual canker Fusarium sp (fungi)	Statistical regression, correlative.	1/5ac circular plots, 73 across landscape (68 retained for analysis as containing sugar maple).	635ac	None	Natural variation.	Mean incidence of canker 25% (0-67%). Symptoms on trees 2-16in, with 93% in 2-9in class. Possibility of recovery in older trees. Increases in both tree density and sugar maple density increased incidence of canker. Less canker in softwoods and mixed woods when compared to maple-beech-birch forests.	3	Tree density	4	Fusarium canker	NA	0	Reduced	5	NA	0	NA	0	Not clear	Species mixture
bezos2012	Case study	Monterry Pine Plantations - Spain	Fusarium circinatum - Pitch Canker Disease (fungi)	Experiment - between site comparisons	50 plots, 25 trees per plot measured, size of plots themselves unclear.	16 sites separated by at least 500m	Non-pruned infected trees.	Pruning. On trees already infected.	More cankers in pruned plots than un-pruned. More cankers present on whorls in pruned, but no difference in cankers on intersections. Dead tree presence not impacted by pruning. Pruning may increase both chance of becoming infected and infection severity. Suggest mechinsm may be due to attractiveness of resins released through pruning, or lack of disinfection of forestry machinery. Disease higher…	3	Pruning of infected trees	15	Fusarium canker	NA	0	Reduced	5	NA	0	NA	0	Resins released by pruning; transmission via machinery	Site of canker (whorls vs internodes)
bishaw2003	Experiment	White pine stands- USA	White pine blister rust		0.4ha, with area covered by trees from 0.04ha to 0.16ha.			Pines planted on clearcut. Seedlings chosen for resistance to pathogen. Spacing at 2, 3, 4, 5 and 6m. Replicated 3 times, with 3m 6 times. 3m also pure douglas fir and mixed white pine douglas fir.	Overall survival high, 93% in 2m to 98% in 6m at age 8. Survial declined then as result of rust, but no difference related to spacing. No relationship between blister rust infection or blister rust morality with spacing.	3	Tree density: spacing	4	White pine blister rust	NA	0	no effect	3	NA	0	NA	0	Not clear	None
blodgett1997	Experiment	Red pine in USA. 9 year old plantation.	Sphaeropsis sapinea (fungi)	Experiment - between tree comparisons	40 trees, 4.9m apart at least, ground cover surveyed over 1.8m radius	Single forest	No treatment	Weed control (herbicide), supplementary water, or a combination. Disease development measured by distance from inoculation that necrotic needles seen 4 weeks after innoculation. Monitored over 3 years.	Herbicide and additional water in combination gave the least severe disease symptoms. Tree growth was also higher for this group, and for the single herbicide or water groups compared to the no treatment group. Suggest water stress caused by competitin vegetation was the key driver of disease severity.	3	Veg.: Weed control (herbicide)	16	Sphaeropsis sapine	NA	0	Increased	1	NA	0	NA	0	Tree vigour (due to tree-herb water competition)	Additional water (alone and increased herbicide effect)
burden1992	Case study	Pine forests, Umea, Sweden	Phacidium infestans (fungi)	Between site comparisons, statisitical regression	4-8 50x2m belt transects at 4 sites	Single region, multiple forests	NA	Natural variation in tree densities.	Models vary in whether density of trees is significant in fungi severity, but where significant was positive. Density of standing dead plants appears more important. Positive relationship between tree density and proportion of plants infected. Density dependance was more strongly positive in stands with higher levels of disease (indicating higher disease progression in these stands), this reduced…	4	Tree density	4	Phacidium infestans	NA	0	Positive effect	1	NA	0	NA	0
campbell2000	Case study	Pine forest - British Columbia, Canada	White pine blister rust (fungi)	Statistical regression, correlative.	1-3 plots in each of 54 stands. 20mx20m, and 50m apart at least.	54 stands across British Columbia.	None	Natural variation.	Blister rust found throughout region. Older stands higher probabilty of death by white pine blister rust, but high variability. 37-47% of variation in incidence of blister rust explained by tree canopy cover, presense of alternative vectors (Ribes sp) and mean number of rust free days. Low canopy cover highest predictor of rust incidence, and presence of other vectors increase incidence.	3	Host: Presence of alternative host (Ribes sp.)	3	White pine blister rust (fungi)	NA	0	Reduced	5	NA	0	NA	0	Not clear	Canopy cover, stand age, number of frost free days
campbell2000	Case study	Pine forest - British Columbia, Canada	White pine blister rust (fungi)	Statistical regression, correlative.	1-3 plots in each of 54 stands. 20mx20m, and 50m apart at least.	54 stands across British Columbia.	None	Natural variation.	Blister rust found throughout region. Older stands higher probabilty of death by white pine blister rust, but high variability. 37-47% of variation in incidence of blister rust explained by tree canopy cover, presense of alternative vectors (Ribes sp) and mean number of rust free days. Low canopy cover highest predictor of rust incidence, and presence of other vectors increase incidence.	3	Canopy cover	5	White pine blister rust (fungi)	NA	0	Increased	1	NA	0	NA	0	Not clear	Stand age, alternative host, number of frost free days
campbell2000	Case study	Pine forest - British Columbia, Canada	White pine blister rust (fungi)	Statistical regression, correlative.	1-3 plots in each of 54 stands. 20mx20m, and 50m apart at least.	54 stands across British Columbia.	None	Natural variation.	Blister rust found throughout region. Older stands higher probabilty of death by white pine blister rust, but high variability. 37-47% of variation in incidence of blister rust explained by tree canopy cover, presense of alternative vectors (Ribes sp) and mean number of rst free days. Low canopy cover highest predictor of rust incidence, and presence of other vectors increase incidence.	3	Age/structure: Stand age	6	White pine blister rust (fungi)	NA	0	Reduced	5	NA	0	NA	0	Not clear	Canopy cover, alternative host, number of frost free days
chang1996	Experiment	Lab	Root rot Phellinus moxius (fungi)	Lab experiment.	NA	Lab	None	Water levels manipulated in soils in lab (-0.025,-0.15,-0.42,-0.50 Mpa). Fungi survial tested.	Survival of anthroconidia in soils varied non-lineraly with water levels, but did not exceed 3.5 months. Basidiospores declined most quickly in driest soils, and slowest in wet soils, but did not exceed 4.5 months. Mycelia declined most rapidly in dry soil (4 weeks), and had highest recovery rates in wettest soils, though in all soils could not be recovered after 10 weeks. P. noxius could be reco…	1	Microclim: soil water level (in lab)	11	Phellinus moxius (root rot)	NA	0	Reduced	5	NA	0	NA	0	Survival of fungal spores	None	Fungal survival in soil only (higher in wetter), no measures of trees
chou1988	Experiment	Pine forest - USA	Diplodia pinea (fungi)	Experiment - between site comparisons	35 trees, 3 plots. 25 trees/plot innoculated	Adjacent plots.	None	Initial thinning to 600 stems/ha. Pruning to 25, 40 or 50% tree height.	Infection appeared to vary due to tree charactertistics independent of pruning. Higher rates of infection in 40 and 50% pruning compared to 25%, but no difference between 40 and 50%.	3	Pruning	15	Diplodia pinea	NA	0	Gen reduced (non-linear)	4	NA	0	NA	0	Wound openings	Tree characteristics.
cleary2013	Case study	Conifers in Scandanivia and Canada	Root pathogens Armillaria, Heterobasidion and Phellinus (fungi)	Experiment - between site comparisons	Varied depending on location or treatment, up to 2.5ha	Three countries (Canada, Demark, Sweden)		Innoculum removal through removal of infected stumps. Site 1: Stump removal, stump removal and root raking, or no action, replated with 2 yr old Douglas fir. Site 2: Stump removal and no stump removal. 1 yr old Douglas fir and western larch planted. Site 3: cleared and roots taken and root raked, or stumps left as normal. Replanted with Douglas fir, lodgepole pine, and paper birch. Site 4: site w…	Site 1: Fluctuations over time, but after 21 years mortality higher in control than either treated plots. Site 2: More diseased roots found in control (19.3%) than treated (6.3% and 6.8%). Higher mortality for Douglas fir than western larch. Site 3: Mortality in untreated plot 9%-27% and treated plot 1.3%-3% after 20 years for A ostoyae. 23%-38% and 2.8%-4.6% after 40 years for A ostoyae. P sulph…	4	Stump/ root removal	8	Armillaria (and two other root pathogens: Heterobasidion and Phellinus).	NA	0	Increased	1	NA	0	NA	0	Presence of pathogen in soil	None
cleary2013	Case study	Conifers in Scandanivia and Canada	Root pathogens Armillaria, Heterobasidion and Phellinus (fungi)	Experiment - between site comparisons	Varied depending on location or treatment, up to 2.5ha	Three countries (Canada, Demark, Sweden)		Innoculum removal through removal of infected stumps. Site 1: Stump removal, stump removal and root raking, or no action, replated with 2 yr old Douglas fir. Site 2: Stump removal and no stump removal. 1 yr old Douglas fir and western larch planted. Site 3: cleared and roots taken and root raked, or stumps left as normal. Replanted with Douglas fir, lodgepole pine, and paper birch. Site 4: site w…	Site 1: Fluctuations over time, but after 21 years mortality higher in control than either treated plots. Site 2: More diseased roots found in control (19.3%) than treated (6.3% and 6.8%). Higher mortality for Douglas fir than western larch. Site 3: Mortality in untreated plot 9%-27% and treated plot 1.3%-3% after 20 years for A ostoyae. 23%-38% and 2.8%-4.6% after 40 years for A ostoyae. P sulph…	4	Stump/ root removal	8	Heterobasidion (and two other root pathogens: Armillaria and Phellinus)	NA	0	Increased	1	NA	0	NA	0	Presence of pathogen in soil	None
cleary2013	Case study	Conifers in Scandanivia and Canada	Root pathogens Armillaria, Heterobasidion and Phellinus (fungi)	Experiment - between site comparisons	Varied depending on location or treatment, up to 2.5ha	Three countries (Canada, Demark, Sweden)		Innoculum removal through removal of infected stumps. Site 1: Stump removal, stump removal and root raking, or no action, replated with 2 yr old Douglas fir. Site 2: Stump removal and no stump removal. 1 yr old Douglas fir and western larch planted. Site 3: cleared and roots taken and root raked, or stumps left as normal. Replanted with Douglas fir, lodgepole pine, and paper birch. Site 4: site w…	Site 1: Fluctuations over time, but after 21 years mortality higher in control than either treated plots. Site 2: More diseased roots found in control (19.3%) than treated (6.3% and 6.8%). Higher mortality for Douglas fir than western larch. Site 3: Mortality in untreated plot 9%-27% and treated plot 1.3%-3% after 20 years for A ostoyae. 23%-38% and 2.8%-4.6% after 40 years for A ostoyae. P sulph…	4	Stump/ root removal	8	Phellinus (and two other root pathogens: Heterobasidion and Armillaria)	NA	0	Increased	1	NA	0	NA	0	Presence of pathogen in soil	None
condeso2007	Case study	Evergree (oak) forest - California, USA	Sudden Oak Death Phytophthora ramorum (oomycyte)	Statistical regression, correlative.	86 plots 15x15m	20.25km2	none	Natural varaition	At plot level canopy cover and bay abundance (alternative host) predicted abundace of pathogen. At landscape scale over 30m woodland area and elevation were also added to the model. As scale increase impact of woodland area increased, and impact of canopy cover decreased.	3	Host: Presence of alternative host (bay)	3	P. ramorum	NA	0	Reduced	5	NA	0	NA	0	Not clear	elevation, canopy cover, woodland area
condeso2007	Case study	Evergree (oak) forest - California, USA	Sudden Oak Death Phytophthora ramorum (oomycyte)	Statistical regression, correlative.	86 plots 15x15m	20.25km2	none	Natural varaition	At plot level canopy cover and bay abundance (alternative host) predicted abundace of pathogen. At landscape scale over 30m woodland area and elevation were also added to the model. As scale increase impact of woodland area increased, and impact of canopy cover decreased.	3	Canopy cover	5	P. ramorum	NA	0	Reduced	5	NA	0	NA	0	Not clear	elevation, host present, woodland area
condeso2007	Case study	Evergree (oak) forest - California, USA	Sudden Oak Death Phytophthora ramorum (oomycyte)	Statistical regression, correlative.	86 plots 15x15m	20.25km2	none	Natural varaition	At plot level canopy cover and bay abundance (alternative host) predicted abundace of pathogen. At landscape scale over 30m woodland area and elevation were also added to the model. As scale increase impact of woodland area increased, and impact of canopy cover decreased.	3	Landsacpe: woodland ( = patch) area	20	P. ramorum	Increased	5	NA	0	NA	0	NA	0	Not clear	elevation, canopy cover, host presence
cram2010	Experiment	Longleaf pine, USA	Heterobasidion annosum (fungi)	Experiment	36.56 and 28.47ac. 11ac burnt	single site		No stump treatment, or treatment with fungicide. Perscribed burn on 11ac of block.	H. annosum killed 44% of dead trees. Small amount of other fungi also present. Longleaf pine mortality highest in burnt and no stump treatment area. No treatment higher annosum levels.	1	Burning	18	Heterobasidion annosum	NA	0	Reduced	5	NA	0	NA	0	Not clear	Stump treatment
crone2014	Case study	Eucalyptus forests (Australia probably, but not stated)	Phytopthora cinnamomi (oomycete)		30mx30m, with treatment centre of 15mx15m	Two sites in single forest	No management	Removal of vegetation hosts before replanting. Vegetation removed using herbicides, and germination prevented for 28 months.	P. cinnamomi recovered 8/9 times in treated plot, compared to 22/23 times in control plots, significantly lower. But once vegetation regrowth allowed increases in P. cinnamomi recorded in treated plots. Pathogen recovered from soil, not trees	3	Veg. removal by herbicide pre-planting	16	Phytophthora cinnamomi	NA	0	Increased	1	NA	0	NA	0	Presence of pathogen in soil	None	Results recovery of pathogen from soil
cushman2008	Case study	Northern and Central California, Oak and bay laurel.	Sudden Oak Death Phytophthora ramorum (oomycyte)	Statistical regression, correlative.	6 9m trail segments	275km2 mosaic landscape	NA	Humans as vectors	Pathogen higher on hiking trails than off when no hosts were present in the landscape, though not true in areas with high numbers of hosts. Bay laurel showing symptoms were more abundant in areas with public access than private land. Chances of pathogen at site significantly higher in areas with higher surrounding human population.	3	Access: Hiking trails, public access, and human population density	24	P. ramorum	Increased	5	Reduced	5	NA	0	NA	0	Humans as vectors	Presence of host trees reduced effect of hiking trails
davidson2011	Case study	California. Mediterrean forest. Mixed evergreen or redwood.	Sudden Oak Death Phytophthora ramorum (oomycyte)	Statistical regression, correlative.	10 trees per site for 5 sites. 1ha at two sites.	200km of coastal forest	NA	Alternative forest types. Mixed evergreen and redwood, concerned with incidence of disease in Bay Laurel. Natural forests.	Higher rates of infection in mixed evergreen than redwood, and higher severity of disease and lower recovery. Redwood may have earlier infection, and had higher rates of new infection. Results suggested to relate to invasion history of plots as well as microclimatic differences.	3	Species mixture	2	P. ramorum	NA	0	Reduced	5	Reduced	5	NA	0	invasion history and microclimate	Year. Rainfall	Higher infection in mixed evergreen;
dillon2014	Case study	Californian oak forests.	Sudden Oak Death Phytophthora ramorum (oomycyte)	Statistical regression, correlative.	at each site nested plots of 15x15m, 60x60m, 140x140m, 220x220m	20 sites single region	NA	Relationship between disease intensity and plot to landscape scale characteristics	Across all scales host density increased disease incidence, though declines between 40-160m.	3	Tree density: Host density (in mixed-sp forests)	4	P. ramorum	NA	0	Reduced	5	NA	0	NA	0	Not clear	Elevation at 15m and 60m extents only.
dsouza2004	Case study	Glasshouse trail on replanted bauxite pit. Australia.	Phytopthora cinnamomi (oomycete)	Comparison of treatments.	2x2m containing 16 trees. Plus 0.5m buffer of Acacia where applicable.12 plots.	Single forest	B. grandis planted alone. All repeated without innoculation.	Banksia grandis protected by presence of Acacia sp. Glasshouse and fieldtrial in regenerated bauxite pit. Bauxite pit was known to be infested with pathogen, and planted with native seed mix. B. grandis seedling planted with Acacia seedlings, and soil innoculated after 10 months. Glasshouse grown in pots and innoculated after 5 months.	In the field trial B. grandis planted with A. pulchella had the same infection rates as non-innoculated plants, therefore A. pulchella thought to effectively protect B. grandis from infection. A. lateriticola and A. drummondii did not protect from infection. In the glasshouse trial all Acacia delayed infection. A. puchella and A. lateriticola had lower infection after 12 weeks, but infection stil…	3	Species mixture	2	Phytophthora cinnamoni	NA	0	Increased	1	NA	0	NA	0	In glasshouse amount of soil innoculum reduced, but not replicated in field trial.	Identity of Acacia species included in the mixture
dwyer2007	Case study	Oak forests - Missouri	Oak decline (multiple pathogens).	BACI	12 0.5ac plots at each site	2 sites in 7100ac	No harvesting.	Improvement harvest. Removing diseased, defective, or poor quality trees. Re-assessed 14 years later.	Crown dieback did not vary between harvested and control plots after 14 years. Treatment did not impact the progression of disease severity in trees (no fewer trees got worse in the treatment vs the control).	3	Thinning (called "improvement harvest" of diseased/poor trees)	14	Oak decline (multiple pathogens)	NA	0	No effect	3	No effect	3	NA	0	No effect	None
ellis2010	Case study	Oak forests - California	Sudden Oak Death Phytophthora ramorum (oomycyte)	Modelling, statistical regression, correlative.	86 plots 15x15m	Simgle US county	No control.	Connectivity, including landscape features or distance only.	Models of disease incidence performed best when both environmental variables and connectivity are considered. Models incorporating landscape structure into connectivity also performed better than just distance. Connectivity as only distance was not retained in top models when considering AIC, but was when landscape was considered. Evironmental variables were more important than connectivity to ex…	4	Canopy cover	5	P. ramorum	NA	0	Increased	1	NA	0	NA	0	Ability of pathogen to become established	Environmental conditions relative humidity, connectivity, solar irradiance, DBH, temp)
ellis2010	Case study	Oak forests - California	Sudden Oak Death Phytophthora ramorum (oomycyte)	Modelling, statistical regression, correlative.	86 plots 15x15m	Simgle US county	No control.	Connectivity, including landscape features or distance only.	Models of disease incidence performed best when both environmental variables and connectivity are considered. Models incorporating landscape structure into connectivity also performed better than just distance. Connectivity as only distance was not retained in top models when considering AIC, but was when landscape was considered. Evironmental variables were more important than connectivity to ex…	4	Landscape connectivity	21	P. ramorum	Increased	5	NA	0	NA	0	Increased	5	Ability of pathogen to reach area	Environmental conditions (canopy cover, relative humidity, solar irradiance, DBH, temp)	Landscape structure more important than just distance. Canopy cover and relative humidity of more importance than connectivity
entry1991	Experiment	Pine plantation, USA.	Armillaria root rot - Armillaria ostoyae (fungi)	Experiment - between site comparisons	0.1ha 42 plots, at least 20m apart. 10 trees per plot innoculated.	3 sites.	Unthinned and unfertilised	Thinned to 5m spacing, thinned and fertilised with N 364kg/ha. Innoculated 10 years later.	Thinned and fertilised sites have higher diease rates. Thinned only plots had lower infection than control.	4	Thinning	14	Armillaria root rot	NA	0	Increased	1	NA	0	NA	0	Physiological changes to tree. Increased lignin, phenolic compounds and protein precipitable tannins in thinned trees.	Fertiliser when combined with thinning reduced resistance
felto2016	Review	Sweden		Literature review	na	Global	Even aged spruce stand	Mixed-species production forest. Planted spruce and either naturally regenerated birch or Scots pine, at least 30% of the least abundant.	Weight of evidence suggests reduced damage in mixed stands, but uncertainities around less studied pests and pathogens remain.	1	Species mixture (with spruce)	2	Multiple	NA	0	Gen increased	2	NA	0	NA	0	Not clear	NA	NB = review of multiple studies
ferchaw2013	Case study	Pine forest - California (med)	Pitch canker - Gibberella circinata (fungi)	Comparison of two treatments.	9 each of 0.05, 0.1 and 0.2ha	106ha	No control for disease element of study. Comparison of two treatments.	Trees felled and removed to create gaps 0.05. 0.1 or 0.2ha . Remaing biomass either lopped and scattered, or piled and burned, with burn remenants then scattered. Gaps reforested with 1 yr old Montary pine of 13 parent trees, with varied suceptability to pathogen. Trees were interplanted after 12 months to replace lost trees.	Overall survival rates were higher in pile and burn than lop and scatter, but not impacted by gap size. Growth highest in larger gaps, but not impacted by treatment. Pitch canker infection rate did not vary between pile and burn or lop and scatter. 0.2ha had higher infection rate than smaller gaps. Western gall rust infection rate was slightly higher in pile and burn, and 0.05ha. Mixed effects mo…	3	Harvest: Felling gap size	9	Gibberella circinata - pitch canker	NA	0	Reduced (but non-linear in MEM)	4	NA	0	NA	0	Not clear	Positive interaction with gall rust. Impacted by brash treatment.	But no effect on survival and growth increased
ferchaw2013	Case study	Pine forest - California (med)	Western gall rust	Comparison of two treatments.	9 each of 0.05, 0.1 and 0.2ha	106ha	No control for disease element of study. Comparison of two treatments.	Trees felled and removed to create gaps 0.05. 0.1 or 0.2ha . Remaing biomass either lopped and scattered, or piled and burned, with burn remenants then scattered. Gaps reforested with 1 yr old Montary pine of 13 parent trees, with varied suceptability to pathogen. Trees were interplanted after 12 months to replace lost trees.	Overall survival rates were higher in pile and burn than lop and scatter, but not impacted by gap size. Growth highest in larger gaps, but not impacted by treatment. Pitch canker infection rate did not vary between pile and burn or lop and scatter. 0.2ha had higher infection rate than smaller gaps. Western gall rust infection rate was slightly higher in pile and burn, and 0.05ha. Mixed effects mo…	3	Harvest: Felling gap size	9	Gibberella circinata - pitch cankerShould this read Western Gall rust?	NA	0	Increased (slightly)	2	NA	0	NA	0	Not clear	Brash treatment	But no effect on survival and growth increased
ferchaw2013	Case study	Pine forest - California (med)	Pitch canker - Gibberella circinata (fungi)	Comparison of two treatments.	9 each of 0.05, 0.1 and 0.2ha	106ha	No control for disease element of study. Comparison of two treatments.	Trees felled and removed to create gaps 0.05. 0.1 or 0.2ha . Remaing biomass either lopped and scattered, or piled and burned, with burn remenants then scattered. Gaps reforested with 1 yr old Montary pine of 13 parent trees, with varied suceptability to pathogen. Trees were interplanted after 12 months to replace lost trees.	Overall survival rates were higher in pile and burn than lop and scatter, but not impacted by gap size. Growth highest in larger gaps, but not impacted by treatment. Pitch canker infection rate did not vary between pile and burn or lop and scatter. 0.2ha had higher infection rate than smaller gaps. Western gall rust infection rate was slightly higher in pile and burn, and 0.05ha. Mixed effects mo…	3	Burning: Burn brash	18	Gibberella circinata - pitch canker	NA	0	No effect	3	NA	0	NA	0	Not clear	Positive interaction with gall rust	But survival increased for overall infection
ferchaw2013	Case study	Pine forest - California (med)	Western gall rust	Comparison of two treatments.	9 each of 0.05, 0.1 and 0.2ha	106ha	No control for disease element of study. Comparison of two treatments.	Trees felled and removed to create gaps 0.05. 0.1 or 0.2ha . Remaing biomass either lopped and scattered, or piled and burned, with burn remenants then scattered. Gaps reforested with 1 yr old Montary pine of 13 parent trees, with varied suceptability to pathogen. Trees were interplanted after 12 months to replace lost trees.	Overall survival rates were higher in pile and burn than lop and scatter, but not impacted by gap size. Growth highest in larger gaps, but not impacted by treatment. Pitch canker infection rate did not vary between pile and burn or lop and scatter. 0.2ha had higher infection rate than smaller gaps. Western gall rust infection rate was slightly higher in pile and burn, and 0.05ha. Mixed effects mo…	3	Burning brash	18	Gibberella circinata - pitch cankerShould this read Western Gall rust?	NA	0	Reduced (slightly)	4	NA	0	NA	0	Not clear	Harvest fell gap size	But survival increased
fichtner2011	Case study	UK woodlands (Cornwall), containing invasive Rhododendron ponitcum	Phytopthora sp. (oomycete)	Comparison between sites.	Unstated.	Cornwall - 3 separate forests	Non-cleared woodland.	Woodland cleared of R. ponticum.	Phytopthora sp. Were still present in cleared woodland, suggesting persistance over time in soil following clearance. Only sampled three woodlands with R. ponticum and one that had been cleared.	4	Host: Removal of co-host (R. ponticum)	16	Phytophthora sp.	NA	0	No effect	3	NA	0	NA	0	Not clear	None	Measurement of presense of infection in R. Ponticum roots
filip2010	Case study	Oregon mixed-conifer forest	Armillaria Root Disease - Armillaria ostoyate (fungi)	Paired site comparisons.	12-29ac	4 sites, single forest	Untreated stands, still with high disease incidence	Shelterwood and group selection harvesting. Shelterwood species Douglas fir and ponderosa pine, stands 12 and 18ac. Group selection removed trees from 0.5-1.5ac, with one to three harvests per stand (stands 29 and 18ac). Gaps replanted with ponderosa pine, lodgepole pine, rust-resistant sugar pine, western larch, incence ceder and douglas fir, 1 year after harvesting, as well as natural regenerat…	No significant difference in basal area or DBH of trees between group selection and control after 10 years. Armillaria resistant seedlings were higher in harvested stands than non-harvested. Shelterwood DBH showed no significant difference between harvested and non-harvested stands, but an increase in Armillaira resistant seedlings.	3	Harvest: Shelterwood and group selection harvesting followed by replanting	7	Armillaria root rot	NA	0	NA	0	Increased	1	NA	0	Not clear	Tree species	Increased abundance of planted and natural regeneration Armillaria-resistant seedlings. No effect on tree DBH/basal area
ganley2016	Case study	New Zeland forests	Dutch Elm disease - Ophiostoma novo-ulmi (fungi)	Desciption of impacts of eradication and control methods.	na	New Zealand	NA	Surveys, trapping and tree removal in initial eradication period.	Eradication was not possible, but spread of disease was slowed by surveys and removal of diseased individuals.	1	Thinning (= selective removal of diseased trees)	14	Dutch elm disease	Decreased	2	NA	0	NA	0	Decreased	2	Not clear	None stated	Greater Aukland Area. Exact size of area not specified, but contained area within north of the North Island. This paper is mainly descriptive of efforts, not a large amount of quantative analysis
gerlach1997	Experiment	Planted hardwood seedlings in cleared areas, Minnesota, USA	Armillaria Root Disease - (fungi)	Experiment - comparing alternative plantings.	14-15 seedlings of each of 10 species. 28 plots	2 sites, single forest	No control.	Varied density gradient (0.25, 0.5, 1, 2m spacings). Varied mixing of species at 0.25m and 0.5m spacing (60% conifers, random - 80% confiers with alternating white spruce rows - 30% conifers with alternating aspen rows). Checked biweekly for infection.	Overall mortality was determined by species. Balsam fir, tamarak and black spruce had highest mortality, and these are used to test species mixture and density effects. No significant impacts of density on mortality (tendancy to increase is reported with P=0.1). Species mixture did have significant impact on mortaility, with mixes dominated by conifers (which are also the most highly suceptable) …	3	Species ID: Planted tree seedling species identity	1	Armillaria root rot	NA	0	Increased	1	NA	0	NA	0	Not clear	None
gerlach1997	Experiment	Planted hardwood seedlings in cleared areas, Minnesota, USA	Armillaria Root Disease - (fungi)	Experiment - comparing alternative plantings.	14-15 seedlings of each of 10 species. 28 plots	2 sites, single forest	No control.	Varied density gradient (0.25, 0.5, 1, 2m spacings). Varied mixing of species at 0.25m and 0.5m spacing (60% conifers, random - 80% confiers with alternating white spruce rows - 30% conifers with alternating aspen rows). Checked biweekly for infection.	Overall mortality was determined by species. Balsam fir, tamarak and black spruce had highest mortality, and these are used to test species mixture and density effects. No significant impacts of density on mortality (tendancy to increase is reported with P=0.1). Species mixture did have significant impact on mortaility, with mixes dominated by conifers (which are also the most highly suceptable) …	3	Species mixture: Planted tree seedling species mixture	2	Armillaria root rot	NA	0	Reduced	6	NA	0	NA	0	Not clear	None	Species in mixture: Populus tremuloides, Picea mariana, Pinus banksiana, Quercus rubra, Abies balsamea, Acer saccharum, Larix laricina, Pinus strobus, Picea glauca, Betula alleghaniensis
gerlach1997	Experiment	Planted hardwood seedlings in cleared areas, Minnesota, USA	Armillaria Root Disease - (fungi)	Experiment - comparing alternative plantings.	14-15 seedlings of each of 10 species. 28 plots	2 sites, single forest	No control.	Varied density gradient (0.25, 0.5, 1, 2m spacings). Varied mixing of species at 0.25m and 0.5m spacing (60% conifers, random - 80% confiers with alternating white spruce rows - 30% conifers with alternating aspen rows). Checked biweekly for infection.	Overall mortality was determined by species. Balsam fir, tamarak and black spruce had highest mortality, and these are used to test species mixture and density effects. No significant impacts of density on mortality (tendancy to increase is reported with P=0.1). Species mixture did have significant impact on mortaility, with mixes dominated by conifers (which are also the most highly suceptable) …	3	Tree density: Planted tree seedling density	4	Armillaria root rot	NA	0	No effect	3	NA	0	NA	0	Not clear	Tree species	Non-significant increase is reported
gibbs2002	Case study	Pine plantation, East Anglia, UK	Heterobasidon annosum (fungi)		Historic data, plot sizes not reported.	Single forest.	No thinning. No stump removal.	Thinning, thinning and stump treatment (creosote). Stump removal: all stumps or 'clear fell' stumps only). Delayed replanting	In thinned plots, with or without stump treatment, mortality was initially low, but rapidly increased, with increase later for treated plots. Stump removal had lower mortality through disease, at 20% for both (vs59%), more so in later experiments with more effective removal. Delayed replanting had little impact. (This is all from past reports, not well defined)	1	Stump removal	8	Heterobasidon annosum	NA	0	Increased	1	NA	0	NA	0	Not clear	Effectiveness of removal of stumps
gibbs2002	Case study	Pine plantation, East Anglia, UK	Heterobasidon annosum (fungi)		Historic data, plot sizes not reported.	Single forest.	No thinning. No stump removal.	Thinning, thinning and stump treatment (creosote). Stump removal: all stumps or 'clear fell' stumps only). Delayed replanting	In thinned plots, with or without stump treatment, mortality was initially low, but rapidly increased, with increase later for treated plots. Stump removal had lower mortality through disease, at 20% for both (vs59%), more so in later experiments with more effective removal. Delayed replanting had little impact. (This is all from past reports, not well defined)	3	Thinning	14	Heterobasidon annosum	NA	0	Increased	1	NA	0	NA	0	Not clear	Effectiveness of removal of stumps
goheen2012	Case study	Ceder	Port-Orford-cedar root disease - Phyophthora lateralis (oomycete)	Monitoring of disease incidence.	10 transects 0.4-0.8 km long	Single forest	Water not used to wash vehicles.. Site with no roadside sanitation.	Washing of vehicles. Roadside sanitation (removal of host trees 8-15m from road edges in both infected and non-infected areas) bait seedlings planted in sanitised area and beyond, left for 6 weeks and retireved.	P. lateralis found in water from first and second wash, though higher concentrations in the first. Progressive decline in numbers of infected bait trees over time in sanitised areas, lagest declines up to year 4. No similar trend seen in non-sanitised areas. Infection was concentrated at the roadside.	3	thinning (selective removal of host trees in proximity of road edges). I'm not sure on this being thinning, as the intention was to create a buffer with no hosts along the road. This seems like a different approach to other thinning papers.	14	Phytophthora lateralis	NA	0	Increased	1	NA	0	Reduced	1	Host removal	None
goheen2012	Case study	Ceder	Port-Orford-cedar root disease - Phyophthora lateralis (oomycete)	Monitoring of disease incidence.	10 transects 0.4-0.8 km long	Single forest	Water not used to wash vehicles.. Site with no roadside sanitation.	Washing of vehicles. Roadside sanitation (removal of host trees 8-15m from road edges in both infected and non-infected areas) bait seedlings planted in sanitised area and beyond, left for 6 weeks and retireved.	P. lateralis found in water from first and second wash, though higher concentrations in the first. Progressive decline in numbers of infected bait trees over time in sanitised areas, lagest declines up to year 4. No similar trend seen in non-sanitised areas. Infection was concentrated at the roadside.	3	Access: Vehicle washing.	25	Phytophthora lateralis	NA	0	NA	0	NA	0	Reduced	1	Presence of pathogen in vehcile wash water implied as a mechanism	None
greene2008	Case study	Red oak forests - Texas USA	Oak wilt - Ceratocytus fagacearum (fungi)	Paired site comparisons.	2 plots per block 26-64ha	3 blocks, separated by 21-28km	Site matched for topography, soil, vegatation, with no girdling.	Basal girdling of infected trees over 5cm dbh.	More fungal mats produced in control plots than girdled plots. Mats per stem significantly reduced by girdling. Disease proliferation was not impacted by treatment.	3	Thinning (basal girdling of infected trees over 5 cm dbh)	14	Oak wilt - Ceratocytus fagacearum	NA	0	Inceased	1	NA	0	No impact	3	Not clear	Tree size. Block	Pathogen abundance reduced but "disease transmission not impacted"
haas2016	Case study	California oak forests	Sudden Oak Death Phytophthora ramorum (oomycyte)	Statistical regression, correlative.	202 15x15m plots	275km2	NA	Monitoring across varied area with confirmed pathogen presence	Positive relationship between bay laurel density and inoculum load through time. Inoculum load higher in wetter years. Species and stem size predict infection risk at the individual level. At community level species richness decreased infection risk, even when accounting for the impact of bay laurel as a host. At landscape level rain was correlated to increased infection risk.	4	Species ID: Tree species identity	1	P. ramorum	NA	0	Increased	1	NA	0	NA	0		Rainfall, stem size, bay laureal, temperature
haas2016	Case study	California oak forests	Sudden Oak Death Phytophthora ramorum (oomycyte)	Statistical regression, correlative.	202 15x15m plots	275km2	NA	Monitoring across varied area with confirmed pathogen presence	Positive relationship between bay laurel density and inoculum load through time. Inoculum load higher in wetter years. Species and stem size predict infection risk at the individual level. At community level species richness decreased infection risk, even when accounting for the impact of bay laurel as a host. At landscape level rain was correlated to increased infection risk.	4	Species mixture: Tree species richness	2	P. ramorum	NA	0	Increased	1	NA	0	NA	0		Rainfall, stem size, tree species, bay laureal, temperature
haas2016	Case study	California oak forests	Sudden Oak Death Phytophthora ramorum (oomycyte)	Statistical regression, correlative.	202 15x15m plots	275km2	NA	Monitoring across varied area with confirmed pathogen presence	Positive relationship between bay laurel density and inoculum load through time. Inoculum load higher in wetter years. Species and stem size predict infection risk at the individual level. At community level species richness decreased infection risk, even when accounting for the impact of bay laurel as a host. At landscape level rain was correlated to increased infection risk.	4	Tree density: Alternative host tree density	4	P. ramorum	NA	0	Decreased	5	NA	0	NA	0	Pathogen spill over	Rainfall, stem size, tree species, temperature
haas2016	Case study	California oak forests	Sudden Oak Death Phytophthora ramorum (oomycyte)	Statistical regression, correlative.	202 15x15m plots	275km2	NA	Monitoring across varied area with confirmed pathogen presence	Positive relationship between bay laurel density and inoculum load through time. Inoculum load higher in wetter years. Species and stem size predict infection risk at the individual level. At community level species richness decreased infection risk, even when accounting for the impact of bay laurel as a host. At landscape level rain was correlated to increased infection risk.	4	Tree stem size	6	P. ramorum	NA	0	Reduced	5	NA	0	NA	0		Rainfall, tree species, bay laureal, temperature
hagle1988	Case study	White pine plationation, USA	White pine blister rust (fungi)	Experiment - between site comparisons	16 1/20ac plots	Three stands, single area	Untreated pines	Pruning of infected branches, excising of cankers	12% of treated tress had lethal infections remaining, predominantly due to incomplete pruning or excisions of lesions. 81% success in excision of cankers. Untreated pines all showed infection (but treatment was also based on tree which could be treated, so these were more infected to begin with).	1	Pruning	15	White pine blister rust	NA	0	NA	0	Increased	1	NA	0	Not clear	None	Study focus on projecting economic gains from management, not management itself.
hantsch2013	Case study	Germany mixed forest	Foliar fungi		16 main plots, 120x48m, 3 subplots of 80 patches of 8x8m. 100 trees in total, 6 per plot.	Single forest		Single, double, or 4 tree species in mixtures.	Quercus most effected species, pathogen loas and number of pathogen species. At plot level no significant impact of tree species richness on fungal species richness or pathogen load. No impact of tree neighbours on fungi species richness, marginal impact on pathogen load with Quercus, with higher diversity decresing load. This was highest for fungi species Erysiphe alphitoides and E. hypophylla.	3	Tree species richness	2	Foliar fungi	NA	0	Slight increase	2	NA	0	NA	0	Not clear	None
hantsch2014	Experiment	Planted native forests in Saxony, Germany. Focus on Quercus petraea and Tilia cordata.	Foliar fungus, Ascomycota.	Statistical regression, correlative.	98 5x5m plots containing 30 trees	2 blocks on single site	NA	Varied species mixtures. Bare ground, monocultures, two-six species mixtures. Sites managed to remove weeds by mowing and roundup. Planted at 1m between rows, 0.8m within, 30 individuals. Planted 2005, sampled 2010-2012	T. cordata showed decreased fungal species richness and infestation with increased neighbour diversity. No impact of neibours on Q. petraea fungal species richness, but decresed fungal infestation. No impact of proportion of host species (Q. petraea or T cordata) in direct neighbours on fungal species richness or fungal infestation. Non-host neighbour species (F. sylvatica, F. excelsior, P. abies…	3	Species mixture: Tree species mixture	2	Foliar fungi, Ascomycota	NA	0	Increased	1	NA	0	NA	0	Not clear	Year. Infected tree species. Fungal species.
hantsch2014	Experiment	Planted native forests in Saxony, Germany. Focus on Quercus petraea and Tilia cordata.	Foliar fungus, Ascomycota.	Statistical regression, correlative.	98 5x5m plots containing 30 trees	2 blocks on single site	NA	Varied species mixtures. Bare ground, monocultures, two-six species mixtures. Sites managed to remove weeds by mowing and roundup. Planted at 1m between rows, 0.8m within, 30 individuals. Planted 2005, sampled 2010-2012	T. cordata showed decreased fungal species richness and infestation with increased neighbour diversity. No impact of neibours on Q. petraea fungal species richness, but decresed fungal infestation. No impact of proportion of host species (Q. petraea or T cordata) in direct neighbours on fungal species richness or fungal infestation. Non-host neighbour species (F. sylvatica, F. excelsior, P. abies…	3	Species mixture: Neighbour tree species identity (host versus non-host species)	2	Foliar fungi, Ascomycota	NA	0	Very complex	6	NA	0	NA	0	Not clear	Year. Infected tree species. Fungal species.	Effects of host versus non-host neighbours needs clarifying
hantsch2014a	Experiment	Germany mixed forest	Foliar fungi	Experiment - between site comparisons	1700m2 hexagon, containing 44 mono-specific patches of 7m diameter and 20 trees. 200 trees sampled	Single forest	None	Plots containing 16 tree species with varied functional traits. 4 species per plot.	Quercus petrea, Acer sp and Tilia cordata had highest pathogen richness and load, Sorbus aucuparia high richnessm Populus tremula high load. Conifer speces carried no pathogens. Functional diversity showed no effect on pathogen richness or pathogen load. Mean community pathogen richness increased with presence of Acer platanoides. Pathogen load increased with increased susceptible trees A. platan…	3	Tree species identiy	1	Foliar fungi	NA	0	Mixed	6	NA	0	NA	0	Not clear	Tree species
hantsch2014a	Experiment	Germany mixed forest	Foliar fungi	Experiment - between site comparisons	1700m2 hexagon, containing 44 mono-specific patches of 7m diameter and 20 trees. 200 trees sampled	Single forest	None	Plots containing 16 tree species with varied functional traits. 4 species per plot.	Quercus petrea, Acer sp and Tilia cordata had highest pathogen richness and load, Sorbus aucuparia high richnessm Populus tremula high load. Conifer speces carried no pathogens. Functional diversity showed no effect on pathogen richness or pathogen load. Mean community pathogen richness increased with presence of Acer platanoides. Pathogen load increased with increased susceptible trees A. platan…	3	Tree functional diversity	2	Foliar fungi	NA	0	no effect	3	NA	0	NA	0	No effect	Tree species
harrington1983	Experiment	Mixed forest, Humboldt County, California, USA	Black stain root disease, Leptographium wageneri (fungi)	Experiment - between plot comparisons	30 0.08ha plots	Single forest	Unthinned plots	Plots thinned to 2.4x2.4m, 3.6x3.6m,4.8x4.8 or 6x6m spacing	Douglas fir were found to be infected only in the thinned plots. And 28% of Douglas fir in thinned plots were dead or dying. No significant difference was found with regards to distance between trees in thinned plots.	3	Thinning	14	Black stain root disease - Leptographium wageneri (fungi)	Increased	1	NA	0	NA	0	NA	0	Disturbance by thinning operations	None
hass2011	Case study	Mixed forest types, California, USA. Pathogen in bay laurel and tanoak	Phythophthora ramorum (oomycete)		280 500m2 plots	Plots at least 300m apart. Single region (79,356ha), multiple forest types	NA	Natural variation. Forest characterisitics, biotic and abiotic.	Negative relationship between diease incidence and species diversity, accounting for host and landscpae heterogeneity (negative relationship to precipitation, redwood compared to mixed forest, and sampling year). Positive relationship to vegetation cover in 200m buffer around plot.	3	Species diversity	2	Phythophthora ramorum	NA	0	Increased	1	NA	0	NA	0	Not clear	Precipitation, forest type, year, landscape vegetation
hass2011	Case study	Mixed forest types, California, USA. Pathogen in bay laurel and tanoak	Phythophthora ramorum (oomycete)		280 500m2 plots	Plots at least 300m apart. Single region (79,356ha), multiple forest types	NA	Natural variation. Forest characterisitics, biotic and abiotic.	Negative relationship between diease incidence and species diversity, accounting for host and landscpae heterogeneity (negative relationship to precipitation, redwood compared to mixed forest, and sampling year). Positive relationship to vegetation cover in 200m buffer around plot.	3	Landscape vegetation cover	28	Phythophthora ramorum	NA	0	Decreased	5	NA	0	NA	0	Not clear	Precipitation, forest type, year, species diversity
havrdova2017	Case study	Ash trees, Czech Republic	Hymenoscyphus fraxineus Ash dieback (fungi)	Statistical regression, correlative.	Not specified	Czech Republic - across all Ash stands (1169)	None	Natural variation. Stocking density.	Damage in 80.8% of stands. Higer diease incidence with increased stocking density, vertical heterogenity, temperature, width and presence of watercourse and smaller distances to nearest ash stand. Presence of alternative vectors did not impact.	4	Host: presence of alternative hosts	3	Ash dieback - Hymenoscyphus fraxineus	NA	0	no effect	3	NA	0	NA	0	Not clear	Stocking densirt, site class, vertical heterogenity, temperatire, presence and width of water course, tree height, forest sltitudianl zone, distance to nearest ash	This is risk of infection for whole stand
havrdova2017	Case study	Ash trees, Czech Republic	Hymenoscyphus fraxineus Ash dieback (fungi)	Statistical regression, correlative.	Not specified	Czech Republic - across all Ash stands (1169)	None	Natural variation. Stocking density.	Damage in 80.8% of stands. Higer diease incidence with increased stocking density, vertical heterogenity, temperature, width and presence of watercourse and smaller distances to nearest ash stand. Presence of alternative vectors did not impact.	4	Tree density (Of ash)	4	Ash dieback - Hymenoscyphus fraxineus	NA	0	Reduced	5	NA	0	NA	0	Not clear	Stocking densirt, site class, vertical heterogenity, temperatire, presence and width of water course, tree height, forest sltitudianl zone, distance to nearest ash	This is risk of infection for whole stand
havrdova2017	Case study	Ash trees, Czech Republic	Hymenoscyphus fraxineus Ash dieback (fungi)	Statistical regression, correlative.	Not specified	Czech Republic - across all Ash stands (1169)	None	Natural variation. Stocking density.	Damage in 80.8% of stands. Higer diease incidence with increased stocking density, vertical heterogenity, temperature, width and presence of watercourse and smaller distances to nearest ash stand. Presence of alternative vectors did not impact.	4	Age/structure: Vertical heterogeneity (= mixed size/age structure)	6	Ash dieback - Hymenoscyphus fraxineus	NA	0	Reduced	5	NA	0	NA	0	Not clear	Stocking densirt, site class, vertical heterogenity, temperatire, presence and width of water course, tree height, forest sltitudianl zone, distance to nearest ash	This is risk of infection for whole stand
havrdova2017	Case study	Ash trees, Czech Republic	Hymenoscyphus fraxineus Ash dieback (fungi)	Statistical regression, correlative.	Not specified	Czech Republic - across all Ash stands (1169)	None	Natural variation. Stocking density.	Damage in 80.8% of stands. Higer diease incidence with increased stocking density, vertical heterogenity, temperature, width and presence of watercourse and smaller distances to nearest ash stand. Presence of alternative vectors did not impact.	4	Microclim: Temperature	12	Ash dieback - Hymenoscyphus fraxineus	NA	0	Reduced	5	NA	0	NA	0	Not clear	Stocking densirt, site class, vertical heterogenity, temperatire, presence and width of water course, tree height, forest sltitudianl zone, distance to nearest ash	This is risk of infection for whole stand
havrdova2017	Case study	Ash trees, Czech Republic	Hymenoscyphus fraxineus Ash dieback (fungi)	Statistical regression, correlative.	Not specified	Czech Republic - across all Ash stands (1169)	None	Natural variation. Stocking density.	Damage in 80.8% of stands. Higer diease incidence with increased stocking density, vertical heterogenity, temperature, width and presence of watercourse and smaller distances to nearest ash stand. Presence of alternative vectors did not impact.	4	Landscape: proximity to nearest ash stand	21	Ash dieback - Hymenoscyphus fraxineus	Increased	5	NA	0	NA	0	NA	0	Not clear	Stocking densirt, site class, vertical heterogenity, temperatire, presence and width of water course, tree height, forest sltitudianl zone, distance to nearest ash	This is risk of infection for whole stand
havrdova2017	Case study	Ash trees, Czech Republic	Hymenoscyphus fraxineus Ash dieback (fungi)	Statistical regression, correlative.	Not specified	Czech Republic - across all Ash stands (1169)	None	Natural variation. Stocking density.	Damage in 80.8% of stands. Higer diease incidence with increased stocking density, vertical heterogenity, temperature, width and presence of watercourse and smaller distances to nearest ash stand. Presence of alternative vectors did not impact.	4	Access (water): width and presence of watercourse	23	Ash dieback - Hymenoscyphus fraxineus	Increased	5	Reduced	5	NA	0	NA	0	Not clear	Stocking densirt, site class, vertical heterogenity, temperatire, presence and width of water course, tree height, forest sltitudianl zone, distance to nearest ash	This is risk of infection for whole stand
helander2006	Case study	Silver birch - Finland. Managed and unmanaged.	Endophyte fungi	Statistical regression, correlative.	Transects 20mx100m. 17 total, 6-7 trees/transect, 112 trees total.	Transects 'several kilometers' apart. In new, managed, and mature forests.	NA	Stand age.	Saplings highest fungal infection, followed by natural, and managed lowest. No difference in diversity of fungi species. Tree specific variables were not significant. Saplings - no impact for number of surrounding birch trees, or % crown cover. Tree height negative relationship to fungal presence. Natural forests- more fungi in older stands, and crown cover negative relationship with some species…	4	Species mixture: Neighbour tree species identity (conspecifics)	2	Endophyte fungi (unclear how pathogenic)	NA	0	No effect	3	NA	0	NA	0	Not clear	Stand age. Canopy cover.
helander2006	Case study	Silver birch - Finland. Managed and unmanaged.	Endophyte fungi	Statistical regression, correlative.	Transects 20mx100m. 17 total, 6-7 trees/transect, 112 trees total.	Transects 'several kilometers' apart. In new, managed, and mature forests.	NA	Stand age.	Saplings highest fungal infection, followed by natural, and managed lowest. No difference in diversity of fungi species. Tree specific variables were not significant. Saplings - no impact for number of surrounding birch trees, or % crown cover. Tree height negative relationship to fungal presence. Natural forests- more fungi in older stands, and crown cover negative relationship with some species…	4	Canopy cover: % crown cover	5	Endophyte fungi (unclear how pathogenic)	NA	0	No effect	3	NA	0	NA	0	Not clear	Stand age.	In saplings no effect versus in mature forest increased resistance versus managed forest variable effect
helander2006	Case study	Silver birch - Finland. Managed and unmanaged.	Endophyte fungi	Statistical regression, correlative.	Transects 20mx100m. 17 total, 6-7 trees/transect, 112 trees total.	Transects 'several kilometers' apart. In new, managed, and mature forests.	NA	Stand age.	Saplings highest fungal infection, followed by natural, and managed lowest. No difference in diversity of fungi species. Tree specific variables were not significant. Saplings - no impact for number of surrounding birch trees, or % crown cover. Tree height negative relationship to fungal presence. Natural forests- more fungi in older stands, and crown cover negative relationship with some species…	4	Age/structure: Tree/forest stand age (mature versus sapling), or tree height	6	Endophyte fungi (unclear how pathogenic)	NA	0	Increased	1	NA	0	NA	0	Not clear	Canopy cover
helander2006	Case study	Silver birch - Finland. Managed and unmanaged.	Endophyte fungi	Statistical regression, correlative.	Transects 20mx100m. 17 total, 6-7 trees/transect, 112 trees total.	Transects 'several kilometers' apart. In new, managed, and mature forests.	NA	Stand age.	Saplings highest fungal infection, followed by natural, and managed lowest. No difference in diversity of fungi species. Tree specific variables were not significant. Saplings - no impact for number of surrounding birch trees, or % crown cover. Tree height negative relationship to fungal presence. Natural forests- more fungi in older stands, and crown cover negative relationship with some species…	4	Managed (versus unmanaged) forest	10	Endophyte fungi (unclear how pathogenic)	NA	0	Increased	1	NA	0	NA	0	Not clear	Stand age. Canopy cover.
hessberg2001	Case study	Douglas fir plantation, Southwest Oregon	Black stain root disease, Leptographium wageneri (fungi)		Whole plantation, size unstated. Roadside strips 40.2m wide at every road/trail. For intensive sample 80 plantations, 2 fixed radius plot series, along trail and across centre. 0.0041ha, radius 3.6m	500 stands across SW Oregon	Unthinned	Thinning. Previous stand cable or tractor yarded. Regeneration (natural, planted, or both).	Extensive survey: Rot in 18.6% plantations. Glendale: Thinning alone predicted increase in rot incidence, Armillaria increased with tractor yarding. Cable yarded but not thinned lowest rot. Jacksonville: Thinned and both tractor and cable yarded higher rot than only cable or tractor. Other locations showed no relationship. Across district: thinning increase incidence of disease regardless of trac…	4	Harvest: Tractor yarding (versus cable yarding)	7	Armillaria	NA	0	Reduced	5	NA	0	NA	0	Not clear	Site	Armillaria was not the primary focus of the study.
hessberg2001	Case study	Douglas fir plantation, Southwest Oregon	Black stain root disease, Leptographium wageneri (fungi)		Whole plantation, size unstated. Roadside strips 40.2m wide at every road/trail. For intensive sample 80 plantations, 2 fixed radius plot series, along trail and across centre. 0.0041ha, radius 3.6m	500 stands across SW Oregon	Unthinned	Pre-commercial thinning. Previous stand cable or tractor yarded. Regeneration (natural, planted, or both).	Extensive survey: Rot in 18.6% plantations. Glendale: Thinning alone predicted increase in rot incidence, Armillaria increased with tractor yarding. Cable yarded but not thinned lowest rot. Jacksonville: Thinned and both tractor and cable yarded higher rot than only cable or tractor. Other locations showed no relationship. Across district: thinning increase incidence of disease regardless of trac…	4	Thinning: Pre-commercial thinning	14	Black stain root disease - Leptographium wageneri (fungi)	NA	0	Reduced	5	NA	0	NA	0	Not clear	Site
hessberg2001	Case study	Douglas fir plantation, Southwest Oregon	Black stain root disease, Leptographium wageneri (fungi)		Whole plantation, size unstated. Roadside strips 40.2m wide at every road/trail. For intensive sample 80 plantations, 2 fixed radius plot series, along trail and across centre. 0.0041ha, radius 3.6m	500 stands across SW Oregon	Unthinned	Pre-commercial thinning. Previous stand cable or tractor yarded. Regeneration (natural, planted, or both).	Extensive survey: Rot in 18.6% plantations. Glendale: Thinning alone predicted increase in rot incidence, Armillaria increased with tractor yarding. Cable yarded but not thinned lowest rot. Jacksonville: Thinned and both tractor and cable yarded higher rot than only cable or tractor. Other locations showed no relationship. Across district: thinning increase incidence of disease regardless of trac…	4	Access: Proximity to roads and major skid trils	25	Black stain root disease - Leptographium wageneri (fungi)	Increased	5	Reduced	5	NA	0	NA	0	This result seems to be attributed to tree damage from machinery.	Site
heybroek1982	Review	Scots pine. Europe	Lophodermium pinastri (fungi)	Experiment	5 rows of 60 plants, 3 blocks	Single site	None	Randomisation of clone planting	More resisistant plots next to suceptible plots had higher mortality than when next to resistant plots, 6.5% increase in mortality.	1	Mixture	2	Lophodermium pinastri (fungi)	NA	0	Decrease	4	NA	0	NA	0	Not clear	None	Reporting results of other studies which are unavailable
heybroek1982	Review	Scots pine. Europe	Lophodermium pinastri (fungi)	Experiment	49 trees.	Single site	None	Randomisation of clone planting	Higher average disease rating for trees surrounded by others than by own also resistant kind.	1	Mixture	2	Lophodermium pinastri (fungi)	NA	0	Decrease	4	NA	0	NA	0	Not clear	None	Reporting results of other studies which are unavailable
holzmueller2008		Cornus florida in oak-hickory forests, USA	Dogwood anthracnose - Discula destructiva (fungi)	Comparisons between sites.	20x20m, at least 50m from burn edge. 3-5 per area. 70 plots total.	Great Smoky Mountains National Park. 200,000ha (unclear actual size included in study)	Areas not burned for 80years, but similar in slope, aspect, topography, and vegeation	Burning, naturally occuring. Single (30 plots, 7 areas), double (16 plots, 4 areas), or triple burned (9 plots, 3 areas).	Burned sites higher stem density, and smaller trees, with lower stem overstory, but higher understory densities in 2 and 3 burn stands than single or no burn. Foliar health of trees didn't vary by burning, though smaller crowns less healthy in non-burned stands. DBH overstory or understory showed no variation. Suggests that burning has helped to reduce impacts of pathogen (though not actually mea…	4	Burning: Burn frequency (natural)	18	Dogwood anthracnose - Discula destructiva (fungi)	NA	0	No effect	3	NA	0	NA	0	Not clear	Crown size	Quantitative results seem to show no effect, but interpretation suggests that burnign reduced pathogen impact. Probably a poor study to include.
hood2002	Experiment	Second rotation pine forests.	Armillaria root rot (fungi)	Experiment - between site comparisons	39x39.8m 20 plots	3.1ha	810 stems/ha, not pruned	5 thinning and pruning treatment, first at age 7 years. 1) Thinned to 250 stems/ha, residual trees pruned. 2 )Thinned to 250 stems/ha, whole tree extraction, residual trees pruned. 3) Unthinned, pruned. 4) Thinned to 500 stems/ha, pruned. All pruning to 2.2m. Individual trees: No thinning stumps within radius, at least 1 thinning stump within negihbourhood radius, but not infected prior to thinni…	All plots infected prior to thinning. Treatment had a significant effect on incidence of infection, but not intensity. Treatments 1 and 4 (stumps left in ground) higher incidence of diease than where stumps were removed. Pruning had little impact on incidence or severity. At individual tree level higher incidence of infection where tree was adjacent to thinning stumps previously infected, with hi…	3	Stump removal (thinned trees)	8	Armillaria root rot	NA	0	Increased	1	NA	0	NA	0	Not clear	None	More reliable results from subsequent study of same experiment hood2009a
hood2002	Experiment	Second rotation pine forests.	Armillaria root rot (fungi)	Experiment - between site comparisons	39x39.8m 20 plots	3.1ha	810 stems/ha, not pruned	5 thinning and pruning treatment, first at age 7 years. 1) Thinned to 250 stems/ha, residual trees pruned. 2 )Thinned to 250 stems/ha, whole tree extraction, residual trees pruned. 3) Unthinned, pruned. 4) Thinned to 500 stems/ha, pruned. All pruning to 2.2m. Individual trees: No thinning stumps within radius, at least 1 thinning stump within negihbourhood radius, but not infected prior to thinni…	All plots infected prior to thinning. Treatment had a significant effect on incidence of infection, but not intensity. Treatments 1 and 4 (stumps left in ground) higher incidence of diease than where stumps were removed. Pruning had little impact on incidence or severity. At individual tree level higher incidence of infection where tree was adjacent to thinning stumps previously infected, with hi…	3	Thinning intensity	14	Armillaria root rot	NA	0	No effect	3	NA	0	NA	0	Not clear	None	More reliable results from subsequent study of same experiment hood2009a
hood2002	Experiment	Second rotation pine forests.	Armillaria root rot (fungi)	Experiment - between site comparisons	39x39.8m 20 plots	3.1ha	810 stems/ha, not pruned	5 thinning and pruning treatment, first at age 7 years. 1) Thinned to 250 stems/ha, residual trees pruned. 2 )Thinned to 250 stems/ha, whole tree extraction, residual trees pruned. 3) Unthinned, pruned. 4) Thinned to 500 stems/ha, pruned. All pruning to 2.2m. Individual trees: No thinning stumps within radius, at least 1 thinning stump within negihbourhood radius, but not infected prior to thinni…	All plots infected prior to thinning. Treatment had a significant effect on incidence of infection, but not intensity. Treatments 1 and 4 (stumps left in ground) higher incidence of diease than where stumps were removed. Pruning had little impact on incidence or severity. At individual tree level higher incidence of infection where tree was adjacent to thinning stumps previously infected, with hi…	3	Pruning	15	Armillaria root rot	NA	0	No effect	3	NA	0	NA	0	Not clear	None	More reliable results from subsequent study of same experiment hood2009a
hood2009a	Experiment	Pine forest - New Zealand	Armillaria sp. (fungi)	Experimental - thinning	39x39.8m 20 plots	3.1ha	Unthinned, 850 stems/ha	1) Thinned to 250 stems/ha at age 7, residual trees pruned. 2) Thinned to 250 stems/ha at age 7, stumps removed, residual trees pruned. 3) Thinned to 250 stems/ha at age 13.5, all trees pruned at age 7. 4) Thinned to 500 stems/ha at age7, residual trees pruned, thinned to 250 stems/ha at age 13.5 years.	Chronic infection widespread. After 12.5 years significant difference between treatments, with highest disease incidence for treatments 1 and 4. This difference had gone by age 19 years, due to declines in diease incidence in highest pruning treatments, when no differene between treatments and control are seen. no significant difference between severity of diesase between treatments at age 19. At…	3	Stump removal (thinned trees)	8	Armillaria root rot	NA	0	No effect	3	NA	0	NA	0	Not clear	Year	Later observations on same study as hood2002 (effects at 12.5 years disappeared by 19 years)
hood2009a	Experiment	Pine forest - New Zealand	Armillaria sp. (fungi)	Experimental - thinning	39x39.8m 20 plots	3.1ha	Unthinned, 850 stems/ha	1) Thinned to 250 stems/ha at age 7, residual trees pruned. 2) Thinned to 250 stems/ha at age 7, stumps removed, residual trees pruned. 3) Thinned to 250 stems/ha at age 13.5, all trees pruned at age 7. 4) Thinned to 500 stems/ha at age7, residual trees pruned, thinned to 250 stems/ha at age 13.5 years.	Chronic infection widespread. After 12.5 years significant difference between treatments, with highest disease incidence for treatments 1 and 4. This difference had gone by age 19 years, due to declines in diease incidence in highest pruning treatments, when no differene between treatments and control are seen. no significant difference between severity of diesase between treatments at age 19. At…	3	Thinning	14	Armillaria root rot	NA	0	No effect	3	NA	0	NA	0	Not clear	Year	Later observations on same study as hood2002 (effects at 12.5 years disappeared by 19 years)
hungerfood1982	Experiment	White pine stands - Idaho, USA	White pine blister rust	Experiment - between site comparisons	1 acre, with 3x3m tree spacing. Nine per study area. 5 study areas	Plots located across northern Idaho.	Unthinned stands, no pruning.	Thinning, thinning plus pruning, thinning plus pruning only white pine crop trees. Pruning - removing live and dead branches from lower 1/3, and all obviously infected branches.	Thinned only had greater new lethal infections than thinned and pruned. In all but two sites thinned only had more new lethal infections than control. Thinning and pruning had no difference in new lethal infections compared to control. Fewer trees in thinned-only were free of infection than pruned or control. No differce between pruned and control. Fewer new lethal or non-lethal infections in pru…	4	Thinning	14	White pine blister rust (Cronartium ribicola)	NA	0	Reduced	5	NA	0	NA	0	Not clear	Pruning (reduced negative effect of thinning on resistance). Site
hungerfood1982	Experiment	White pine stands - Idaho, USA	White pine blister rust	Experiment - between site comparisons	1 acre, with 3x3m tree spacing. Nine per study area. 5 study areas	Plots located across northern Idaho.	Unthinned stands, no pruning.	Thinning, thinning plus pruning, thinning plus pruning only white pine crop trees. Pruning - removing live and dead branches from lower 1/3, and all obviously infected branches.	Thinned only had greater new lethal infections than thinned and pruned. In all but two sites thinned only had more new lethal infections than control. Thinning and pruning had no difference in new lethal infections compared to control. Fewer trees in thinned-only were free of infection than pruned or control. No differce between pruned and control. Fewer new lethal or non-lethal infections in pru…	4	Pruning	15	White pine blister rust (Cronartium ribicola)	NA	0	Increased	1	NA	0	NA	0	Not clear	Thinning (pruning increased resistance in thinned sites). Site
hunt2002	Experiment	Platation, British Colombia, Canada	White pine blister rust		150 seedlings 2m apart	Two forests, same region	No protection	Placing of deer gaurds around trees to 1.2m.	Blister rust found only in one site, likely due to extensive damage by bears in trees on second site. 31% cankering on protected sites compared to 64% on controls.	3	Physical barrier between trees	21		NA	0	Positive effect	1	NA	0	NA	0	Not clear	Site
jules2002	Case study	Port Orford Ceder, sw Oregon and nw California	Phytophthora lateralis (oomycete)	Correlative, including spatial and temporal componants	37km2	37 km2	None	Natural variation	Pathogen in all watersheds in study area. Infections mostly began where road cross creek, and all infections had a road somewhere upstream. Longer cedar survival in sites not crossed by roads, and much smaller dispersal distance of pathogen in these sites. Incidence of infection positive correlation to drainage area and host abundance, negative with distance from the road to nearest tree.	3	Host: Potential host tree abundance	3	Phytophthora lateralis (oomycete)	Increased	5	NA	0	NA	0	NA	0	Not clear	None
jules2002	Case study	Port Orford Ceder, sw Oregon and nw California	Phytophthora lateralis (oomycete)	Correlative, including spatial and temporal componants	37km2	37 km2	None	Natural variation	Pathogen in all watersheds in study area. Infections mostly began where road cross creek, and all infections had a road somewhere upstream. Longer cedar survival in sites not crossed by roads, and much smaller dispersal distance of pathogen in these sites. Incidence of infection positive correlation to drainage area and host abundance, negative with distance from the road to nearest tree.	3	Access (water): Catchment area (as a measure of stream flow)	23	Phytophthora lateralis (oomycete)	Increased	5	NA	0	NA	0	NA	0	Not clear	None
jules2002	Case study	Port Orford Ceder, sw Oregon and nw California	Phytophthora lateralis (oomycete)	Correlative, including spatial and temporal componants	37km2	37 km2	None	Natural variation	Pathogen in all watersheds in study area. Infections mostly began where road cross creek, and all infections had a road somewhere upstream. Longer cedar survival in sites not crossed by roads, and much smaller dispersal distance of pathogen in these sites. Incidence of infection positive correlation to drainage area and host abundance, negative with distance from the road to nearest tree.	3	Access: Foot traffic	24	Phytophthora lateralis (oomycete)	Increased	5	NA	0	NA	0	NA	0	Not clear	None	28% of infection events associaed with foot traffic
jules2002	Case study	Port Orford Ceder, sw Oregon and nw California	Phytophthora lateralis (oomycete)	Correlative, including spatial and temporal componants	37km2	37 km2	None	Natural variation	Pathogen in all watersheds in study area. Infections mostly began where road cross creek, and all infections had a road somewhere upstream. Longer cedar survival in sites not crossed by roads, and much smaller dispersal distance of pathogen in these sites. Incidence of infection positive correlation to drainage area and host abundance, negative with distance from the road to nearest tree.	3	Access: Vehicles	25	Phytophthora lateralis (oomycete)	Increased	5	NA	0	NA	0	NA	0	Not clear	None	72% of infection events associaed with vehicles
kaitera2002	Experiment	Pine forests Northern Finland	Stem rust fungus Cronartium flaccidum (fungi)	BACI	10 50x50m plots	Single forest	Un thinned plots.	Thinning. Infected trees removed and any infected lesions from remaining trees removed.	Before treatment in both plots 37% of trees showed some lesions, and no difference between plots. No difference in number of trees with sporulating lesions, or the number of sporulating lesions per tree between stands, in each individual year, with both increasing over time to reach highest after 4 years. When data from years 2-7 combined thiined plots did show fewer trees with sporulatiung lesio…	3	Thinning	14	Cronartium flaccidum	NA	0	Small positive	2	NA	0	NA	0	Not clear	None	Paper reporing on sporulation rather than direct disease incidence.
kamp1994		British Colombia lodgepole pine forests. Canada.	Atropellis canker - Atropellis piniphila, stalactiform rust - Cronartium coleosporiodides, comandra rust C. comandrae, western gall rust - Endocronartium harkessii (fungi)	Between site comparisons.	15 plots, containing 50 pines per plot. Permenant plots repeated 1985 and 1992. Initial plots in 1980 - 13 plots, transect lines through plots, with plots 50m along lines, containing 50 trees.		No spacing	Juvenile spacing following natural regeneration	No difference in disease incidence seen between thinned and non-thinned in 1980. Higher DBH in thinned plots. No new incidnece of western gall rust between 1985 and 1992 in thinned or unthinned, and decline in total number seen due to trees (or branches) dying. Stalactiform blister rust higher in thinned than un thinned stands, both immediatly following thinning, and increasing through time. Coma…	4	Thinning (= respacing NR seedlings/saplings)	14	Atropellis canker - Atropellis piniphila (also stalactiform rust - Cronartium coleosporiodides, comandra rust C. comandrae, western gall rust - Endocronartium harkessii)	NA	0	Reduced	5	NA	0	NA	0	Not clear	Fungal species
kamp1994		British Colombia lodgepole pine forests. Canada.	Atropellis canker - Atropellis piniphila, stalactiform rust - Cronartium coleosporiodides, comandra rust C. comandrae, western gall rust - Endocronartium harkessii (fungi)	Between site comparisons.	15 plots, containing 50 pines per plot. Permenant plots repeated 1985 and 1992. Initial plots in 1980 - 13 plots, transect lines through plots, with plots 50m along lines, containing 50 trees.		No spacing	Juvenile spacing following natural regeneration	No difference in disease incidence seen between thinned and non-thinned in 1980. Higher DBH in thinned plots. No new incidnece of western gall rust between 1985 and 1992 in thinned or unthinned, and decline in total number seen due to trees (or branches) dying. Stalactiform blister rust higher in thinned than un thinned stands, both immediatly following thinning, and increasing through time. Coma…	4	Thinning (= respacing NR seedlings/saplings)	14	Stalactiform rust - Cronartium coleosporiodides (also Atropellis canker - Atropellis piniphila, comandra rust C. comandrae, western gall rust - Endocronartium harkessii)	NA	0	Reduced	5	NA	0	NA	0	Not clear	Fungal species
kamp1994		British Colombia lodgepole pine forests. Canada.	Atropellis canker - Atropellis piniphila, stalactiform rust - Cronartium coleosporiodides, comandra rust C. comandrae, western gall rust - Endocronartium harkessii (fungi)	Between site comparisons.	15 plots, containing 50 pines per plot. Permenant plots repeated 1985 and 1992. Initial plots in 1980 - 13 plots, transect lines through plots, with plots 50m along lines, containing 50 trees.		No spacing	Juvenile spacing following natural regeneration	No difference in disease incidence seen between thinned and non-thinned in 1980. Higher DBH in thinned plots. No new incidnece of western gall rust between 1985 and 1992 in thinned or unthinned, and decline in total number seen due to trees (or branches) dying. Stalactiform blister rust higher in thinned than un thinned stands, both immediatly following thinning, and increasing through time. Coma…	4	Thinning (= respacing NR seedlings/saplings)	14	White pine blister rust relative = Comandra rust = Cronartium comandrae (also Atropellis canker - Atropellis piniphila, stalactiform rust - Cronartium coleosporiodides, western gall rust - Endocronartium harkessii)	NA	0	Reduced	5	NA	0	NA	0	Not clear	Fungal species
kamp1994		British Colombia lodgepole pine forests. Canada.	Atropellis canker - Atropellis piniphila, stalactiform rust - Cronartium coleosporiodides, comandra rust C. comandrae, western gall rust - Endocronartium harkessii (fungi)	Between site comparisons.	15 plots, containing 50 pines per plot. Permenant plots repeated 1985 and 1992. Initial plots in 1980 - 13 plots, transect lines through plots, with plots 50m along lines, containing 50 trees.		No spacing	Juvenile spacing following natural regeneration	No difference in disease incidence seen between thinned and non-thinned in 1980. Higher DBH in thinned plots. No new incidnece of western gall rust between 1985 and 1992 in thinned or unthinned, and decline in total number seen due to trees (or branches) dying. Stalactiform blister rust higher in thinned than un thinned stands, both immediatly following thinning, and increasing through time. Coma…	4	Thinning (= respacing NR seedlings/saplings)	14	Western gall rust - Endocronartium harkessii (also Atropellis canker - Atropellis piniphila, stalactiform rust - Cronartium coleosporiodides, comandra rust C. comandrae)	NA	0	Reduced	5	NA	0	NA	0	Not clear	Fungal species
kanaskie2006	Case study	Oak forest Oregon USA	Phythophthora ramorum (oomycete)		42 sites, size unknown, covering total 72 acres	72ac	None	Cutting of infected trees and burning	Pathogen survived on most sites following cutting and burining, but number of new infections has been declining year on year.	2	Thinning	14	Phythophthora ramorum	NA	0	Slight increase	2	NA	0	NA	0	Not clear	None	Abstract of conference talk
katovich2004	Experiment	White pine plationation, USA	White pine blister rust	Experiment	25 trees at 3x3m spacing. H1 48 plots in 1989. C1 600 trees in 1998. S1 900 trees in 1997. S2 1200 trees in 1997/1998. S3 600 trees in 1999. S4 600 trees in 1999.	Single forest		Nursery grown seedlings selcted for rust resistance or not, pruned or unpruned, shelterwood or clearcuts.	H1. Less blister rust incidence in selected than non-selected (3 vs 7 %), and higher in shelter than clear (7vs2%). C1. Blister rust too low to determine impact. S1. No difference between selected and non selected trees for blister rust. S2. All trees browsed so no rust. S3. Blister rust low. S4. Blister rust low. All sites. No difference in selected or non selected trees in blister rust mortalit…	3	Shelterwood or clearcut	9	White pine blister rust	NA	0	Increased	2	NA	0	NA	0	Not clear	Breed
katovich2004	Experiment	White pine plationation, USA	White pine blister rust	Experiment	25 trees at 3x3m spacing. H1 48 plots in 1989. C1 600 trees in 1998. S1 900 trees in 1997. S2 1200 trees in 1997/1998. S3 600 trees in 1999. S4 600 trees in 1999.	Single forest		Nursery grown seedlings selcted for rust resistance or not, pruned or unpruned, shelterwood or clearcuts.	H1. Less blister rust incidence in selected than non-selected (3 vs 7 %), and higher in shelter than clear (7vs2%). C1. Blister rust too low to determine impact. S1. No difference between selected and non selected trees for blister rust. S2. All trees browsed so no rust. S3. Blister rust low. S4. Blister rust low. All sites. No difference in selected or non selected trees in blister rust mortalit…	3	Pruned or unpruned	15	White pine blister rust	NA	0	No effect	3	NA	0	NA	0	Not clear	Breed
kwon2011	Case study	Korean pine forests - mountainous region	Pine wilt disease Bursaphelenchus xylophilus (nematode)	Correlative	Disease incidence reported at district level	Korea	none	Aerial pesticide spraying, nematcide injection, clear cutting and physical elimination of logs and branches (burnt or chipped). As chemical control alone, chemical control + injection, cutting + injection.	Cutting + injection significantly depressed occurance of pine wilt compared to chemical control or + injection. 11/16 districts reported suppression of epidemic in 2 years following switching to cutting + injection. Resurgance was seen in two districts which switched back to chemical control.	4	Harvest: Clear cutting (in combination with pesticide)	7	Pine wilt disease Bursaphelenchus xylophilus (nematode)	NA	0	Increased	1	NA	0	NA	0	Not clear	None
lavallee1991	Experiment	White Pine, Canada	White pine blister rust, Cronartium ribicola (fungi)	Experiment	4.5ha	Single forest	None (compared to predicted levels with no action)	Removal of affected branches for 5 years. Coupled with Ribes eradication.	67 trees showed branch cnakers in treated block, from 121 potential without treatment, plus at least 55 killed.	1	Pruning	15	White pine blister rust	NA	0	Increased	1	NA	0	NA	0	Not clear	None
leak2006	Case study	New Hampshire	Nectria fungi (Nectria coccinea) introduced by beech scale (Cryptococcus fagisuga)	Correlative	164 plots across study areas, at least 1 per acre (no record of size of plots?)	32 acres (single tree selctions) 63 acres (one cut) 59 acres (thinning plot)	None	Old managed- Single tree selction harvests in old growth, targetting poor quality beech, taken three times since 1952. Old unmanaged - Old growth stands reciving single cut for management 1952. Young - Thinning in a second growth plot.	In historical records thinning plot scale incidence of 70-90%, fungi incidence of 40-85%, scale and fungi 80-90% in both old growth plots. In 2004 scale and new fungi infections much low. Old managed stand had 15% clean trees, thinned stand had mainly previously infected trees. Old managed stand does show increased amount of marketable timber compared to unmanaged stand.	3	Thinning (selective of poor quality trees = "single tree selection harvests"!)	14	Nectria fungi (Nectria coccinea) introduced by beech scale (Cryptococcus fagisuga)	NA	0	No clear effect	3	NA	0	NA	0	Not clear	None	Using historical records and potentially large number of unidentified confounding variables.
linden2002	Case study	Coniferous forest, Sweden	Heterobasidon annosum (fungi) and Armillaria, root rot	Creation of predictive model from empirical data	22 plots, size unstated	Southern Sweden, multiple forests	Pure Norway spruce stands	Scots pine admixture with Norway spruce.	Model to explain butt rot includes variables: total cumulative basal area Norway Spruce, mean basla area Scots pine admixture. Models predicted that higher proportion of spruce trees gives lower butt rot incidence, with best effect at 50% mixture.	3	Tree species mixture	2	Root rot	NA	0	Increase	1	NA	0	NA	0	Not clear	None	Predictive model from empirical data
loustau1997		French pine forests	Twisting rust fungus Melampsora pinitorqua (fungi)	Between site comparisons - experimental	960m2, with 3 rows of pines, at 4m distance, for 80m length, and 1 row of grey poplar on either side.	5 blocks of 8 plotd.	None	Block split in half. Half got phosphorate fertiliser, and one plot in each planted, sown, high density (1.5m sown, 3m planted), low density (0.75m sown, 1.5m planted). Innoculated at 1 yr. Thinning of sown pines at 3yrs to meet densities required.	Decrease in infection from 1993 to 1995 observed except in sown, fertilised pines. Shoot infection at 2 yrs old (1993) not impacted by factors tested. 3 yrs (1994) all fertilised pines more infected than non-fertilised, and all planted were more infected than sown pines, though not significant. 4 yrs (1995) fertilised more infected than non-fertilised, and more so in sown pines. Sown fertilised p…	3	Tree density (establishment): Seed sowing or seedling planted density	4	Pine twisting rust fungus Melampsora pinitorqua (fungi)	NA	0	Reduced	5	NA	0	NA	0	Higher infection in trees with higher P and K levels, which were increased with fertilisation, more so in planted than sown pines.	Fertiliser. Planting type.
loustau1997		French pine forests	Twisting rust fungus Melampsora pinitorqua (fungi)	Between site comparisons - experimental	960m2, with 3 rows of pines, at 4m distance, for 80m length, and 1 row of grey poplar on either side.	5 blocks of 8 plotd.	None	Block split in half. Half got phosphorate fertiliser, and one plot in each planted, sown, high density (1.5m sown, 3m planted), low density (0.75m sown, 1.5m planted). Innoculated at 1 yr. Thinning of sown pines at 3yrs to meet densities required.	Decrease in infection from 1993 to 1995 observed except in sown, fertilised pines. Shoot infection at 2 yrs old (1993) not impacted by factors tested. 3 yrs (1994) all fertilised pines more infected than non-fertilised, and all planted were more infected than sown pines, though not significant. 4 yrs (1995) fertilised more infected than non-fertilised, and more so in sown pines. Sown fertilised p…	3	Addition: P fertiliser of planted pine	17	Pine twisting rust fungus Melampsora pinitorqua (fungi)	NA	0	Reduced	5	NA	0	NA	0	Higher infection in trees with higher P and K levels, which were increased with fertilisation, more so in planted than sown pines.	Seed sowing versus planting seedlings (increased negative effect of fertilising). Tree density
loustau1997		French pine forests	Twisting rust fungus Melampsora pinitorqua (fungi)	Between site comparisons - experimental	960m2, with 3 rows of pines, at 4m distance, for 80m length, and 1 row of grey poplar on either side.	5 blocks of 8 plotd.	None	Block split in half. Half got phosphorate fertiliser, and one plot in each planted, sown, high density (1.5m sown, 3m planted), low density (0.75m sown, 1.5m planted). Innoculated at 1 yr. Thinning of sown pines at 3yrs to meet densities required.	Decrease in infection from 1993 to 1995 observed except in sown, fertilised pines. Shoot infection at 2 yrs old (1993) not impacted by factors tested. 3 yrs (1994) all fertilised pines more infected than non-fertilised, and all planted were more infected than sown pines, though not significant. 4 yrs (1995) fertilised more infected than non-fertilised, and more so in sown pines. Sown fertilised p…	3	Establish: Planting seedlings (versus direct seeding)	27	Pine twisting rust fungus Melampsora pinitorqua (fungi)	NA	0	Reduced	5	NA	0	NA	0	Higher infection in trees with higher P and K levels, which were increased with fertilisation, more so in planted than sown pines.	Fertiliser. Tree density
madar1991		Isreal forests.	Canker Seridium cardinale and Diplodia pinea (fungi)		3 plots per site. Trees randomly selected from within. Pruning - 118 trees 2.5m apart in 2 plots, 90 trees 2x3m apart in one plot. Artificial innoculation at one site, no record of number of trees		No pruning.	Pruning of trees, treating of some with would dressing plate (asphalt). Innoculation of tree with either pathogen 12 weeks after pruning at one site.	Higher natural infections of both pathogens following pruning,m in both incidence and severity. Treatment with asphat decreased disese severity in winter and spring, but not summer and autumn. In Diplodia innoculated trees spring pruning reduced stem, but not branch, cankers, but summer pruning had no impact. In Seridium innoculated trees cankers were reduced on stems following spring pruning, an…	3	Pruning	15	Canker Seridium cardinale and Diplodia pinea (fungi)	NA	0	Reduced	5	NA	0	NA	0	Not clear	Season of pruning, dressing of cut with asphalt
madar1991		Isreal forests.	Canker Seridium cardinale and Diplodia pinea (fungi)		3 plots per site. Trees randomly selected from within. Pruning - 118 trees 2.5m apart in 2 plots, 90 trees 2x3m apart in one plot. Artificial innoculation at one site, no record of number of trees		No pruning.	Pruning of trees, treating of some with would dressing plate (asphalt). Innoculation of tree with either pathogen 12 weeks after pruning at one site.	Higher natural infections of both pathogens following pruning,m in both incidence and severity. Treatment with asphat decreased disese severity in winter and spring, but not summer and autumn. In Diplodia innoculated trees spring pruning reduced stem, but not branch, cankers, but summer pruning had no impact. In Seridium innoculated trees cankers were reduced on stems following spring pruning, an…	3	Pruning	15	Diplodia pinea and canker Seridium cardinale (fungi)	NA	0	Reduced	5	NA	0	NA	0	Not clear	Season of pruning, dressing of cut with asphalt
martin2005		Oak forests, Spain. Managed for agriculture.	Charcoal disease - Biscogniauxia mediterranum (fungi). Spread by Cerambyx cerdo beetle.		4 transect. 725 trees in 1989, 834 trees in 2003.	Southwestern Spain. Sierra de Jerez.	No cork extraction, or other management.	Trees undergoing cork extraction	Significant relationship between beetle damage and fungi damage, regardless of treatment or control. Beetle and fungi infection increased between two time periods. More beetles and diesased in cork extracted forests.	3	Wound: Cork bark harvesting	13	Charcoal disease - Biscogniauxia mediterranum (fungi). Spread by Cerambyx cerdo beetle.	NA	0	Reduced	5	NA	0	NA	0	Not clear	None
matilla2002		Pine forests - finland	Pine twisting rust - Melampsora pinitorqua (fungi)	Statistical regression, correlative.	217 plots, 3.99m radii.	Eastern Kontiolahti, North Karelia.	NA	Natural variation in tree densities, species, and abiotic factors	In year 1 amount of damage negatively correlated to distance of plot from aspen, and positively with number of pines. Neither influenced probability of infection or damage, which was explained only by stand area. After 5 years relative number of trees damaged correlated positively with stand area, number of pines, and number of aspen. Probability of damage at any time during a 5 years period incr…	3	Species mixture: Species composition	2	Pine twisting rust - Melampsora pinitorqua (fungi)	NA	0	Mixed	6	NA	0	NA	0	Not clear	Year 1 neighbour species (opposite effects). Stand situated below surrounding area.
matilla2002		Pine forests - finland	Pine twisting rust - Melampsora pinitorqua (fungi)	Statistical regression, correlative.	217 plots, 3.99m radii.	Eastern Kontiolahti, North Karelia.	NA	Natural variation in tree densities, species, and abiotic factors	In year 1 amount of damage negatively correlated to distance of plot from aspen, and positively with number of pines. Neither influenced probability of infection or damage, which was explained only by stand area. After 5 years relative number of trees damaged correlated positively with stand area, number of pines, and number of aspen. Probability of damage at any time during a 5 years period incr…	3	Tree density	4	Pine twisting rust - Melampsora pinitorqua (fungi)	NA	0	Increased	1	NA	0	NA	0	Not clear	Stand situated below surrounding area.	Opposite effects for number of pines or aspen in the mixture, but not total tree density
matilla2002		Pine forests - finland	Pine twisting rust - Melampsora pinitorqua (fungi)	Statistical regression, correlative.	217 plots, 3.99m radii.	Eastern Kontiolahti, North Karelia.	NA	Natural variation in tree densities, species, and abiotic factors	In year 1 amount of damage negatively correlated to distance of plot from aspen, and positively with number of pines. Neither influenced probability of infection or damage, which was explained only by stand area. After 5 years relative number of trees damaged correlated positively with stand area, number of pines, and number of aspen. Probability of damage at any time during a 5 years period incr…	3	Landscape: Stand (= patch) area	20	Pine twisting rust - Melampsora pinitorqua (fungi)	NA	0	Reduced	5	NA	0	NA	0	Not clear	None	Only refered to as stand in paper, unclear on spatial distribution of stands.
mattila2001	Case study	Pine forest - Finland.	Pine twisting rust - Melampsora pinitorqua (fungi)	Statistical regression, correlative.	109 Scots pine stands, in 5 plots per stand.	Three regions in Lapland, Finland.	na	Natural variation in tree densities, species, and abiotic factors	Fertility of soil had largest impact on probability of disease, with higher chance of disease on fertile sites. Presence of aspen increased probabilty of presence of pine rust by 5 times. Lower pine density also lower pine rust probability. Presence of aspen also increased the relative abundace of rust. Where aspen was present increase in willow numbers also increased rust abundance.	4	Species mixture	2	Pine twisting rust - Melampsora pinitorqua (fungi)	NA	0	Reduced	5	NA	0	NA	0	Not clear	Soil fertility, soil stoniness, number of pines	Tree density result is already reported in the follow up paper matilla2002
mattila2001	Case study	Pine forest - Finland.	Pine twisting rust - Melampsora pinitorqua (fungi)	Statistical regression, correlative.	109 Scots pine stands, in 5 plots per stand.	Three regions in Lapland, Finland.	na	Natural variation in tree densities, species, and abiotic factors	Fertility of soil had largest impact on probability of disease, with higher chance of disease on fertile sites. Presence of aspen increased probabilty of presence of pine rust by 5 times. Lower pine density also lower pine rust probability. Presence of aspen also increased the relative abundace of rust. Where aspen was present increase in willow numbers also increased rust abundance.	4	Microclim: Soil fertility	17	Pine twisting rust - Melampsora pinitorqua (fungi)	NA	0	Reduced	5	NA	0	NA	0	Not clear	Presence of aspens, soil stoniness, number of pines
mccracken1997	Experiment	Willow plantation, Northern Ireland	Rust, Melampsora epitea (fungi)	Experimental	2 3.3ha sites. 400 plant sub plots.	Single region	Monoclonal stand	Stand mixtures. 5 or 6 clones, mixture stands	Later diesease arrival and slower progression by species when comparing mono and poly clonal plots in year one. Fungicide application had no impact in year one in site 1, but decreased disease level in site 2. By year two and three no significant differences between disease levels in mono or poly clonal plots were observed, though in year three onset of disease was later in polyclonal plots.	3	Speices mixture: clones	2	Rust, Melampsora epitea (fungi)	NA	0	No effect	3	NA	0	NA	0	No effect	Fungicide in one plot
mccracken1998	Experiment	Willow plantation, Northern Ireland	Rust, Melampsora epitea (fungi)	Experimental	Not stated	Single forest	None	Planting of 20 clones in monoclonal, 5, 10,15, or 20 way plots. In densities of 10,000, 15,000 or 20,000 stems/ha.	Density no impact on disease level in year 1. Mixtures reduced disease level where monocultures had high disease, but not for moderate or low susceptible clones. Number of species in plot didn't lead to any larger impacts. Large variation in suceptibility of clones to rust.	2	Mixture	2	Rust, Melampsora epitea (fungi)	NA	0	Increase	3	NA	0	NA	0	Not clear	Clone
mccracken1998	Experiment	Willow plantation, Northern Ireland	Rust, Melampsora epitea (fungi)	Experimental	Not stated	Single forest	None	Planting of 20 clones in monoclonal, 5, 10,15, or 20 way plots. In densities of 10,000, 15,000 or 20,000 stems/ha.	Density no impact on disease level in year 1. Mixtures reduced disease level where monocultures had high disease, but not for moderate or low susceptible clones. Number of species in plot didn't lead to any larger impacts. Large variation in suceptibility of clones to rust.	2	Density	4	Rust, Melampsora epitea (fungi)	NA	0	No effect	3	NA	0	NA	0	Not clear	Clone
mccracken2001	Experiment	Willow plantation, Northern Ireland	Rust, Melampsora epitea (fungi)	Experimental	32x14m and 32x11m monoclonal blocks, 96x14m 5 way mixtures, 96x28m for 10 way mixtures, 96mx42m for 15 way mixtures and 96mx60m for 20 way mixtures	Single forest	Monoclonal stand	Planting of willow species in 5, 10, 15 or 20 way species mixture plots	Yelid from all species higher in mixture than monoculture plots. Improvements for 5 or 10 way mixtures varied with species.	3	Mixture	2	Rust, Melampsora epitea (fungi)	NA	0	NA	0	Increased	1	NA	0	Not clear	Species
meadows2013	Experiment	Red oak-sweetgum forest USA	Inonotus hispidus (fungi)	Experiment - between site comparisons	4.8ac treatment	9.6ac.	Unthinned (98 trees per ac)	Thinning (32 trees/ac), removing poor quality trees, including those infected with Inonotuc hispidus. Stumps and brash left.	No difference in new disease infections between treatments after 10 years.	2	Thinning	14	Inonotus hispidus (fungi)	NA	0	No effect	3	NA	0	NA	0	Not clear	None
meetenmeyer2008	Case study	Oak forests - California	Sudden Oak Death Phytophthora ramorum (oomycyte)	Statistical regression, correlative.	15x15m 102 plots. At least 300m aprart. Landcover change over 150m radius.	275km2 mosaic landscape	NA	Natural variation. 1942 and 2000 landscape cover change.	Disease expression by bay laurel lower in stands previously grassland in 1942. Proportion of symptomatic stems postively related to woodland area change and 1942 land cover type, but not statistically significant. Number of symptomatic bay leaves positiviely related to density of host stems and woodland area, and negatively related to max temperature. Disease prevelance (proportion of symptomatic…	3	Tree density: Host tree density	4	P. ramorum	NA	0	Reduced	5	NA	0	NA	0	Not clear	None	Reduced for number of leaves, but not proportion of stems.
meetenmeyer2008	Case study	Oak forests - California	Sudden Oak Death Phytophthora ramorum (oomycyte)	Statistical regression, correlative.	15x15m 102 plots. At least 300m aprart. Landcover change over 150m radius.	275km2 mosaic landscape	NA	Natural variation. 1942 and 2000 landscape cover change.	Disease expression by bay laurel lower in stands previously grassland in 1942. Proportion of symptomatic stems postively related to woodland area change and 1942 land cover type, but not statistically significant. Number of symptomatic bay leaves positiviely related to density of host stems and woodland area, and negatively related to max temperature. Disease prevelance (proportion of symptomatic…	3	Microclim: Max temp and solar insolation	12	P. ramorum	NA	0	Increased	1	NA	0	NA	0	Not clear	None
meetenmeyer2008	Case study	Oak forests - California	Sudden Oak Death Phytophthora ramorum (oomycyte)	Statistical regression, correlative.	15x15m 102 plots. At least 300m aprart. Landcover change over 150m radius.	275km2 mosaic landscape	NA	Natural variation. 1942 and 2000 landscape cover change.	Disease expression by bay laurel lower in stands previously grassland in 1942. Proportion of symptomatic stems postively related to woodland area change and 1942 land cover type, but not statistically significant. Number of symptomatic bay leaves positiviely related to density of host stems and woodland area, and negatively related to max temperature. Disease prevelance (proportion of symptomatic…	3	Landscape: Woodland ( = patch) area	20	P. ramorum	NA	0	Reduced	5	NA	0	NA	0	Pathogen most abundant in cooler, less solar irradiated forests. Both negative relationship to woodland area.	None
menkis2016	Case study	Elm forest Gotland, Sweden	Dutch Elm disease - Ophiostoma sp (fungi)	Mapping spread.	na	Gotland island, Sweden 2994km2	NA	Diseased trees mapped, felled, and destroyed. From 2009 trees in potential root contact with infected trees also felled and destroyed, and stumps treated with insecticide. Traps for bark beetles also.	Area impacted by dutch elm disease increased in all years, regardless of action.	3	Thinning:Selective removal of diseased trees and neighbour trees	14	Dutch Elm disease - Ophiostoma sp (fungi)	NA	0	No effect	3	NA	0	NA	0	Not clear	None	Paper likely of limited use as little empirical data, just area of infection for many simultaneous control strategies
menkis2016	Case study	Elm forest Gotland, Sweden	Dutch Elm disease - Ophiostoma sp (fungi)	Mapping spread.	na	Gotland island, Sweden 2994km2	NA	Diseased trees mapped, felled, and destroyed. From 2009 trees in potential root contact with infected trees also felled and destroyed, and stumps treated with insecticide. Traps for bark beetles also.	Area impacted by dutch elm disease increased in all years, regardless of action.	3	Insecticide treatment of cut stumps and trapping of bark beetles	19	Dutch Elm disease - Ophiostoma sp (fungi)	NA	0	No effect	3	NA	0	NA	0	Not clear	None	Paper likely of limited use as little empirical data, just area of infection for many simultaneous control strategies
metzler1997	Case study	Pine stands, Germany	Fungi and bacteria	Between treatment comparison	Whole stands	5 stands	Unpruned	Pruning of green branches with handsaws, up to 10m	Highest fungal infection from unpruned branch stubs in control trees, rather than pruning wounds. General infection rate of trees was higher for pruned than non-pruned however. Prunded material itself showed little fungal infection. Bacteria higher in pruned trees than un-pruned.	3	Pruning	15	Fungi and bacteria	NA	0	Reduced	5	NA	0	NA	0	Not clear	Season of pruning
montagnini2011	Experiment	Caribbean Lowlands, Costa Rica			32mx32m, trees planted 2m apart, 256 trees per plot.		Plantation area abandonned but not replanted.	Replanting on abandonned pasture land. 4 alternative species mixtures tested. 4 species pure plantations, one mixed with 4 species, with two species alternating per line. Plots thinned by removing trees to 4m gaps in half the plot.	Growth varied by species, and by mixture or pure. Higher growth in thinned areas. Mixed plots higher above ground biomass, and sequested carbon at same or better rates. At 2-4 years 3 species suffered less damage in mixed plantations. S. microstachyum in pure plot eradicated by fungus in pure plot, but 42.2% survival in mixed stand. C. brasiliense underwent similar pattern at age 14.	3	Species mixture	2	Glomerella spp. (and Fusarium)	NA	0	Increased	1	NA	0	NA	0	Not clear	Some variation amongst tree species, but there is a dominant trend: Higher tree species survival in mixed plots of two different tree species: S. microstachyum to Glomera and C. brasiliense to Fusarium. Third species Genipa americana showed no mixture effect on surival but no specific agent of damage was identified.
montagnini2011	Experiment	Caribbean Lowlands, Costa Rica			32mx32m, trees planted 2m apart, 256 trees per plot.		Plantation area abandonned but not replanted.	Replanting on abandonned pasture land. 4 alternative species mixtures tested. 4 species pure plantations, one mixed with 4 species, with two species alternating per line. Plots thinned by removing trees to 4m gaps in half the plot.	Growth varied by species, and by mixture or pure. Higher growth in thinned areas. Mixed plots higher above ground biomass, and sequested carbon at same or better rates. At 2-4 years 3 species suffered less damage in mixed plantations. S. microstachyum in pure plot eradicated by fungus in pure plot, but 42.2% survival in mixed stand. C. brasiliense underwent similar pattern at age 14.	3	Species mixture	2	Fusarium (and Glomerella spp.)	NA	0	Increased	1	NA	0	NA	0	Not clear	Some variation amongst tree species, but there is a dominant trend: Higher tree species survival in mixed plots of two different tree species: S. microstachyum to Glomera and C. brasiliense to Fusarium. Third species Genipa americana showed no mixture effect on surival but no specific agent of damage was identified.
morrison1988	Experiment	Ceder-hemlock forests, British Colombia, Canada	Root diseases - Phellinus weirii and Armillaria ostoyae (fungi)	Experiment - between site comparisons	2 80x160 blocks. Blocks divided into 32 20m2 plots. Seedlings at 1.5m spacing.	Adjacent blocks	Conventional logging, stumps left.	Whole tree logging and root raking. Douglas fir, lodepole pine, western red ceder and paper birch planted, alone or combination. Remaining blocks western larch or engelmann spruce.	Largest cause of mortality across study root disease. Percentage mortality for A. ostoyae lower in treated than untreated site for douglas fir and lodgepole pine. P. weirii mortality lower for douglas fir in treated than untreated, no mortality of lodgepole pine from this pathogen in either plot. Mortality rate for douglas fir in untreated plot 1%, and 0.2% in treated plot. 1% and 0.1% for lodgep…	3	Harvest: Whole tree harvesting (with stump removal trees bulldozed and removed with roots intact, no stumps remained) and root raking	8	Armillaria root rot and Phellinus weirii root disease	NA	0	Increased	1	NA	0	NA	0	Not clear	Tree species (planted after logging), including some interaction with fungus species
morrison2001		Douglas fir, Ceder Hemlock, and Engelmann spruce forests British Colombia, Canada	Armillaria root rot (fungi)		12-51ha per site. 5 20x20m plots at each site.			Plots with and without tree removal. Tree removal plots had stumps.	Decay advanced in many stumps, and pathogen isolated. Both selectively cut and undisturbed sites had same % trees with underground lesions. At all sites selectively cut plots had higher disease incidence (all sites) and intensity (all but one site).	3	Harvest: ? Whole tree harvesting (with stumps retained) (= "tree removal") versus unharvested	8	Armillaria root rot	NA	0	Reduced	5	NA	0	NA	0	Not clear	Tree diameter. Site.
morrison2014	Case study	British Colombia Canada	Armillaria root disease, A. ostoyae (fungi)		80mx160m		Stands felled. No stump removal	Stands felled. Stump removal in known infected stands, also root raked. Seedlines planted 1.5m spacing. Douglas fir, pine, receder or birch. Planted alone or in 2 species mix. One of each pure stands thinned after 19 years.	Stump removal and root raking reduced remaing root size. After 30 years less mortality due to fungus in stumped block than non-stumped for all species, though timing of difference varied. Less mortality in plots containing red ceder or birch or both. At age 40 mortality was 14% lower in stumped plot. Douglas fir did not show impact in mortality with mix or monculture when not stumped. Pine better…	2	Species mixture (planted trees)	2	Armillaria root rot	NA	0	Complex	6	NA	0	NA	0	Not clear	Identity of tree species in the mixture (? opposite effect with different species) or is this all part of a three-way interaction with treatment?
morrison2014	Case study	British Colombia Canada	Armillaria root disease, A. ostoyae (fungi)		80mx160m		Stands felled. No stump removal	Stands felled. Stump removal in known infected stands, also root raked. Seedlines planted 1.5m spacing. Douglas fir, pine, receder or birch. Planted alone or in 2 species mix. One of each pure stands thinned after 19 years.	Stump removal and root raking reduced remaing root size. After 30 years less mortality due to fungus in stumped block than non-stumped for all species, though timing of difference varied. Less mortality in plots containing red ceder or birch or both. At age 40 mortality was 14% lower in stumped plot. Douglas fir did not show impact in mortality with mix or monculture when not stumped. Pine better…	2	Stump removal and root raking (after clear fell) versus clear fell alone	8	Armillaria root rot	NA	0	NA	0	Increased	1	NA	0	Lower recovery of diseased root remenants from raked soil. Innoculum removal. (This was initially 'resistance', but I've moved it to 'recovery'.)	Tree species identity (focal species and identity of species in mixture)
nebeker1999		Oak and elm forests	Mutliple		2.4ac, measurement plot 0.6ac. 48 total	Single forest	Unthinned	Thinning	High wounding in thinned plots. Wounds showed high disease incidence. Higher disease in thinned than unthinned (15.7%vs4.6%)	2	Thinning	14	Multiple	NA	0	Reduced	5	NA	0	NA	0	Disease associated with wounds	None
ngyen2016		European forests, mixed	Foliar fungi		6 plots sites, total 209 plots. 30x30m	Europe	None	Species richness	Incidence of diseased leaves and shoots highest in Finland, and lowest in Spain and Romania. Postive relationship between tree species richness and fungi incidence, which increased with latitude. Foliar damage by fungi decresed with species richness of conifers, and increased with broadleaves. Most variance in damage attributed to tree species. On a country level no relationship between disease i…	4	Species identity	1	Fungi	NA	0	Small positive	2	NA	0	NA	0	Not clear	Country
ngyen2016		European forests, mixed	Foliar fungi		6 plots sites, total 209 plots. 30x30m	Europe	None	Species richness	Incidence of diseased leaves and shoots highest in Finland, and lowest in Spain and Romania. Postive relationship between tree species richness and fungi incidence, which increased with latitude. Foliar damage by fungi decresed with species richness of conifers, and increased with broadleaves. Most variance in damage attributed to tree species. On a country level no relationship between disease i…	4	Species mixture	2	Fungi	NA	1	Small negative	4	NA	1	NA	1	Not clear	Latitude
oliva2009	Case study	Spainish fir forests - Pyrenees	Armillaria root disease - Armillaria sp. (fungi)	Statistical regression, correlative.	20m diameter, containing at least 6 silver fir of over 12.5 DBH. 29 Plots, ramdomally distributed.	301 x 150km2	NA	Natural variation.	Higher Armillaria in soil in stands with thinner trees, higher harvested basal area, higher thinning intensity, and higher light index. Higher lengths of fungi assoacited to lower tree density, lower basal area, and lower percentage canopy closure. Fungi frequency associated to higher harvested basal area. Stump colonisation of fungi higher in stands with higher number of thinning operations. Hig…	3	Tree density	4	Armillaria root rot	NA	0	Decreased	5	NA	0	NA	0	Not clear	None	Results considered only with presence of fungi in soil and stumps, not infection in trees
oliva2009	Case study	Spainish fir forests - Pyrenees	Armillaria root disease - Armillaria sp. (fungi)	Statistical regression, correlative.	20m diameter, containing at least 6 silver fir of over 12.5 DBH. 29 Plots, ramdomally distributed.	301 x 150km2	NA	Natural variation.	Higher Armillaria in soil in stands with thinner trees, higher harvested basal area, higher thinning intensity, and higher light index. Higher lengths of fungi assoacited to lower tree density, lower basal area, and lower percentage canopy closure. Fungi frequency associated to higher harvested basal area. Stump colonisation of fungi higher in stands with higher number of thinning operations. Hig…	3	Canopy closure	5	Armillaria root rot	NA	0	Decreased	5	NA	0	NA	0	Not clear	None	Results considered only with presence of fungi in soil and stumps, not infection in trees
oliva2009	Case study	Spainish fir forests - Pyrenees	Armillaria root disease - Armillaria sp. (fungi)	Statistical regression, correlative.	20m diameter, containing at least 6 silver fir of over 12.5 DBH. 29 Plots, ramdomally distributed.	301 x 150km2	NA	Natural variation.	Higher Armillaria in soil in stands with thinner trees, higher harvested basal area, higher thinning intensity, and higher light index. Higher lengths of fungi assoacited to lower tree density, lower basal area, and lower percentage canopy closure. Fungi frequency associated to higher harvested basal area. Stump colonisation of fungi higher in stands with higher number of thinning operations. Hig…	3	Thinning	14	Armillaria root rot	NA	0	Decreased	5	NA	0	NA	0	Not clear	None	Results considered only with presence of fungi in soil and stumps, not infection in trees
ostry2000	Experiment	White pine plationation, USA	White pine blister rust (fungi)	Experiment - between site comparisons				Seedlings selected for resistance. Clearcut vs shelterwood. Pruning lower branches.	WPBR higher in shelterwood, but possibly confounded with Ribes density. Fewer cankers on pruned than unpruned.	3	Shelterwood or clearcut	9	White pine blister rust	NA	0	Reduced	5	NA	0	NA	0	Not clear	none	Lower survival in shelerwood
ostry2000	Experiment	White pine plationation, USA	White pine blister rust (fungi)	Experiment - between site comparisons	Unclear	Single region	None	Seedlings selected for resistance. Clearcut vs shelterwood. Pruning lower branches.	WPBR higher in shelterwood, but possibly confounded with Ribes density. Fewer cankers on pruned than unpruned.	3	Pruning	14	White pine blister rust	NA	0	Increased	1	NA	0	NA	0	Not clear	none
ostry2012	Experiment	Red pine plantation	White pine blister rust. Armillaria root rot.	Experiment	21ha (split for treatments)	4x 64ha blocks	Uncut	Dispersed cut forest, small gaps in forest, large gaps in forest. Retention or removal of brush	Jack pine and white pine mortality not impacted by overstory treatment (thinning),brushing, or interaction. Red pine had lower mortality in dispersed thinning than control, and lower where brushed. Dead jack pine with shoot blight was lower in large gap treatment than control, no impact of brushing. No impact of thinning or brushing in red pine dead infected with shoot blight. Lower incidence of …	3	Thinning	14	White pine blister rust	NA	0	Increase	2	na	0	na	0	Not clear	Tree species
ostry2012	Experiment	Red pine plantation	White pine blister rust. Armillaria root rot.	Experiment	21ha (split for treatments)	4x 64ha blocks	Uncut	Dispersed cut forest, small gaps in forest, large gaps in forest. Retention or removal of brush	Jack pine and white pine mortality not impacted by overstory treatment (thinning),brushing, or interaction. Red pine had lower mortality in dispersed thinning than control, and lower where brushed. Dead jack pine with shoot blight was lower in large gap treatment than control, no impact of brushing. No impact of thinning or brushing in red pine dead infected with shoot blight. Lower incidence of …	3	Brush removal	16	White pine blister rust	NA	0	No effect	3	NA	0	NA	0	Not clear
ostry2012	Experiment	Red pine plantation	White pine blister rust. Armillaria root rot.	Experiment	21ha (split for treatments)	4x 64ha blocks	Uncut	Dispersed cut forest, small gaps in forest, large gaps in forest. Retention or removal of brush	Jack pine and white pine mortality not impacted by overstory treatment (thinning),brushing, or interaction. Red pine had lower mortality in dispersed thinning than control, and lower where brushed. Dead jack pine with shoot blight was lower in large gap treatment than control, no impact of brushing. No impact of thinning or brushing in red pine dead infected with shoot blight. Lower incidence of …	3	Thinning	14	Armillaria root rot	NA	0	Decrease	5	NA	0	NA	0	Not clear
ostry2012	Experiment	Red pine plantation	White pine blister rust. Armillaria root rot.	Experiment	21ha (split for treatments)	4x 64ha blocks	Uncut	Dispersed cut forest, small gaps in forest, large gaps in forest. Retention or removal of brush	Jack pine and white pine mortality not impacted by overstory treatment (thinning),brushing, or interaction. Red pine had lower mortality in dispersed thinning than control, and lower where brushed. Dead jack pine with shoot blight was lower in large gap treatment than control, no impact of brushing. No impact of thinning or brushing in red pine dead infected with shoot blight. Lower incidence of …	3	Thinning	14	Gall rust	NA	0	Decrease	5	NA	0	NA	0	Not clear
otrosina2007	Experiment	Ponderrosa pine, California, USA	Leptographium wageneri (fungi)	Experiment	2.5ha 15 plots	Each treatment single forest.	No treatment	Low impact thinning, limited compaction, High impact thinning, high compaction. Under burning, subsoiling low compatction, underburning and subsoiling.	Highest fungi mortality in control, then high impact thinning, then low impact. Burn only highest mortality in those plots, reduced by subsoiling.	3	Thinning	14	Leptographium wageneri (fungi)	NA	0	Increased	1	NA	0	NA	0	Not clear	None
otrosina2007	Experiment	Ponderrosa pine, California, USA	Leptographium wageneri (fungi)	Experiment	2.5ha 15 plots	Each treatment single forest.	No treatment	Low impact thinning, limited compaction, High impact thinning, high compaction. Under burning, subsoiling low compatction, underburning and subsoiling.	Highest fungi mortality in control, then high impact thinning, then low impact. Burn only highest mortality in those plots, reduced by subsoiling.	3	Burning	18	Leptographium wageneri (fungi)	NA	0	Decreased	5	NA	0	NA	0	Not clear	None
pankuch2003		Spruce forests central Alberta, Canada. Trees 8-10 years old.	Armillaria root disease. Armillaria sinapina and A. ostoyae (fungi)	Statistical regression, correlative.	2 tansects, 30 plots within, separered by 20-30m.	Transects 2.2km apart		Natural variation. Stem density 1200-4000/ha. Site preparation with ripper plow or disc trencher. Roots removed from furrow or interfurrow trencher.	Low wounding across treatments (2% of root surface). Between furrows fewer wounds. 64% trees scarpe wounds, regardless of location. Ripped vs plow trencher had no impact on number of wounds or type of wounds. Infection was associated with wounds, though extent of increase over non-wounded tissue varied with fungi species.	3	Soil preparation	26	Armillaria root rot. Armillaria sinapina and A. ostoyae	NA	0	No effect	3	NA	0	NA	0	Not clear	Armillaria sp.	Results are on effect of treatments on occurrence of tree wounds of different types. These cannot be used to score against our four categories. However, the result that infection is associated with ? root wounds (though the strength of this varied between the Armillaria species) is important.
peacock2001	Case study	Willow plantation, Bristol, UK.	Willow rust disease - Melampsora sp. (fungi). Beetles also considered.	Between site comparisons.	20mx20m, 1m between rows.	not specified	None	Monocultures of 5 willow genotypes. 2 plots of 3 willow types, 2 plots of all willow types. Mixtures planted randomly, or one species per row. Concerned with S viminalis, as susceptilbe to rust and beetle.	Beetle damage higher in monoculture than mixtures after 1 and 2 years regrowth. After 1 year rust damage significantly greater in monoculture than mixture, with 5 way design least diseased. No sig differece with the locations of tree species within mixture. Same after 2 years. Mixture plots showed more aggreagtion of rust in space than monoculture plots. Negative relationship seen between rust an…	2	Species ID: Genotype mixture (of Salix viminalis)	1	Pine twisting rust relative = Willow rust disease - Melampsora sp. (fungi) and beetles (same effects found for both)	NA	0	Increased	1	NA	0	NA	0	Not clear	Beetle damage
peterson2014		Oak forests - Oregon, USA	Sudden Oak Death Phytophthora ramorum (oomycyte)	Randomisations to compare spatial distribution of trees to that expected by chance in each area, one with high traffic, and one with low traffic.	294 sites in Chetco study area, with 709 trees. 36 sites in Borax study area, 80 trees.	Two adjacent forest areas.	NA	Natural variation in tree distance from stream or road. Borax had higher traffic than Chectco.	Diseased trees were not significantly closer to the road than expected by chance, but were closer to streams, in the Chectco area (which has less traffic). In the Borax area diseased trees were not closer to streams or roads than expected by chance.	3	Access: Proximity to road	25	P. ramorum	No effect	3	NA	0	NA	0	NA	0	Not clear	None
peterson2014		Oak forests - Oregon, USA	Sudden Oak Death Phytophthora ramorum (oomycyte)	Randomisations to compare spatial distribution of trees to that expected by chance in each area, one with high traffic, and one with low traffic.	294 sites in Chetco study area, with 709 trees. 36 sites in Borax study area, 80 trees.	Two adjacent forest areas.	NA	Natural variation in tree distance from stream or road. Borax had higher traffic than Chectco.	Diseased trees were not significantly closer to the road than expected by chance, but were closer to streams, in the Chectco area (which has less traffic). In the Borax area diseased trees were not closer to streams or roads than expected by chance.	4	Access (water): Proximity to stream	23	P. ramorum	Increased	5	NA	0	NA	0	NA	0	Not clear	Site (effect only seen in site with less vehicle traffic, not in site with more).
piirto2005	Case study	Monterry Pine in mixed forest - California, USA	Pitch canker - Fusarium circinatum (fungi)	Statistical regression, correlative.	0.081ha, circular. 46 points. Monterarry pine in 17, absent from 29.	Scotts Creek Stand, 106ha	NA	Natural variation	No correlation between pitch canker and stand density.	3	Tree density: Stand density	4	Fusarium circinatum - Pitch canker	NA	0	No effect	3	NA	0	NA	0	Not clear	None
pleysier2006	Experiment	Paulownia fortunei plantations - Australia.	Alternaria blight - Alternaria alternata (fungi)	Lab experiment.	Glasshouse - individual trees.	NA	Leaf discs innoculated after no injury, or not innoculated after injury or none. Repeated for leaves on plant.	Glasshouse management. Leaf discs seperated by plant and innoculated after injury. Leaves also wounded on plant, and innoculated. Leaf discs exposed to varied temperatures and humidity.	No infection on excised leaves unless wounded. On plant wounded leaves showed higher severity of disease symptoms for two pathotypes, but not for a third. Highest lesions on leaves incubated at 25-30 celcius. Lesions increased size with increasing humidity.	1	Microclim: Humidity (in glasshouse, excised leaves)	11	Alternaria blight - Alternaria alternata (fungi)	NA	0	Reduced	5	NA	0	NA	0	Not clear	None
pleysier2006	Experiment	Paulownia fortunei plantations - Australia.	Alternaria blight - Alternaria alternata (fungi)	Lab experiment.	Glasshouse - individual trees.	NA	Leaf discs innoculated after no injury, or not innoculated after injury or none. Repeated for leaves on plant.	Glasshouse management. Leaf discs seperated by plant and innoculated after injury. Leaves also wounded on plant, and innoculated. Leaf discs exposed to varied temperatures and humidity.	No infection on excised leaves unless wounded. On plant wounded leaves showed higher severity of disease symptoms for two pathotypes, but not for a third. Highest lesions on leaves incubated at 25-30 celcius. Lesions increased size with increasing humidity.	1	Wound: Leaf wounding	13	Alternaria blight - Alternaria alternata (fungi)	NA	0	Reduced	5	NA	0	NA	0	Not clear	Pathotypes (effect seen with two, not with third)
puddu2003	Case study	Conifer forests, Italy	Heterobasidion annosum (fungi)		2 linear transects of 100 trees at each of 8 sites	8 locations, single region		Natural variation in altitude, aspect, origin, stand history, stand age, consociation with other species	Pathogen widespread among the stands. Highest damage on stands established on former pasture lands, artificial stands and when soil not original forest soil. No impact of other species consociation. Precipitation pattern altered disease indicence.	3	Tree diversity	2	Heterobasidion annosum	NA	0	No effect	3	NA	0	NA	0	Not clear	Precipitation pattern
puddu2003	Case study	Conifer forests, Italy	Heterobasidion annosum (fungi)		2 linear transects of 100 trees at each of 8 sites	8 locations, single region		Natural variation in altitude, aspect, origin, stand history, stand age, consociation with other species	Pathogen widespread among the stands. Highest damage on stands established on former pasture lands, artificial stands and when soil not original forest soil. No impact of other species consociation. Precipitation pattern altered disease indicence.	3	Previous site use (pasture vs forest)	26	Heterobasidion annosum	NA	0	Decreased	5	NA	0	NA	0	Not clear	Precipitation pattern
ramage2012	Case study	Coast redwood and Douglas fir forests- California	Sudden Oak Death Phytophthora ramorum (oomycyte)	Comparison between paired sites.	0.05ha circular plots.	Point Reyes National Seashore Park	None	Plots paired for high and low severity, matching all else.	Douglas fir forest tanoaks underwent steeper decline in 2 years than redwood foreset tanoaks, with Douglas fir less impacted in 2007, but more in 2009. Environmental variables did not predict oak death distribution. Survival probabilities lower in Douglas fir.	3	Species ID (= dominant species of forest type, not host species)	1	P. ramorum	NA	0	Increased	1	NA	0	NA	0	Not clear	Year
rhoades2003	Experiment	Chestnut - greenhouse trails	Root rot - Phytophthora sp. (oomycete)	Experiment - glasshouse trial.	Glasshouse - individual trees.	NA	None	Greenhouse trial. Seedlings planted in soil compacted to 0.72 and 0.64 g/cm3. Half also treated with fungicide. Irrigation 400/day, 200/day, or 100/2 days.	All seedlings showed infection, mean 30% sampled root tips. Infection highest in optimal and dry loose soils, lowest in dry and wet compacted soils. Within compaction infection highest at optimal watering, and lower with both wet and dry. Loose soil higher infection than compacted. Mortaility low overall, but highest in wet compact soil, regardless of funigcide treatments, but these did not show …	1	Microclim: Soil moisture	11	Phytophthora sp. - root rot of chestnut	NA	0	Non-linear: increased in very dry and very wet soil	6	NA	0	NA	0	Not clear	Compaction. Fungicide
rhoades2003	Experiment	Chestnut - greenhouse trails	Root rot - Phytophthora sp. (oomycete)	Experiment - glasshouse trial.	Glasshouse - individual trees.	NA	None	Greenhouse trial. Seedlings planted in soil compacted to 0.72 and 0.64 g/cm3. Half also treated with fungicide. Irrigation 400/day, 200/day, or 100/2 days.	All seedlings showed infection, mean 30% sampled root tips. Infection highest in optimal and dry loose soils, lowest in dry and wet compacted soils. Within compaction infection highest at optimal watering, and lower with both wet and dry. Loose soil higher infection than compacted. Mortaility low overall, but highest in wet compact soil, regardless of funigcide treatments, but these did not show …	1	Microclim: Soil compaction	26	Phytophthora sp. - root rot of chestnut	NA	0	Increased	1	NA	0	NA	0	Not clear	Soil moisture. Fungicide
richter2011	Experiment	Fraser fir plantations - North Carolina and Virginia, USA	Phytophthora cinnamomi (oomycete)	Experimental - plot comparisons, soil treatment.	16 trees, 5 replicates per site, 80 trees per treatment, 400 trees per site. Trees on 152xm grid, with buffer between plots.	Not specified, across 4 locations.	No additional matter to soil.	Plots with added woodchip mulch, compost amended woodchip mulch, or pine bark added on top of soils, or compost/soil sulphur added into soils by rototiller.	Mitchell site - woodchip compost better survival and less severe disease than control or compost treated soils, and woodchip better survival than control. Watauga - Pine bark and woodchip compost better survival than compost and control. Woodchip compost less severe than control or compoast, and pine bark less severe than compost or woodchip. Avery-2 - woodchip less mortality and severity than no…	3	Addition of organic mulch/bark ammendments	17	Phytophthora cinnamomi	NA	0	Increased	1	NA	0	NA	0	Microbial activity, cellulase enzyme activity, soil pH and plant nutrient composition all impacted by treatment, but not directly related to pathogen in the paper.	Site and ammendment type	Compost alone did not improve
roach2015	Case study	Ceder-hemlock forests, British Colombia, Canada	Damage incidence - including disease, insect, weather and animal damage. Western gall rust (fungi) also tested seperately.	Statistical regression, correlative.	27 plots. 6 Circular 50m2 plots at each location, at 50m intervals along a transect.	Colombia basin - SE British Colombia. 1386 plantations.	No preparation or no stand tending.	Site preparation - Broadcast burn, mechanical site preparation. Stand tending - Precommercial thinning, weeding. Treated as separate individual effects. Lodgepole pine plantations.	Damage to lodgepole pine higher than other species. Western gall rust in 97% of sites, and 39% of lodgepole pine, most significant damaging agent. Western gall rust risk increased with increased soil moisture, northerly aspect, and mechanical site preparation. Precommercially thinned stands had lower risk than non-thinned.	4	Micrcolim: Soil moisture/northerly aspect	11	Western gall rust	NA	0	Reduced	5	NA	0	NA	0	Not clear	Tree species
roach2015	Case study	Ceder-hemlock forests, British Colombia, Canada	Damage incidence - including disease, insect, weather and animal damage. Western gall rust (fungi) also tested seperately.	Statistical regression, correlative.	27 plots. 6 Circular 50m2 plots at each location, at 50m intervals along a transect.	Colombia basin - SE British Colombia. 1386 plantations.	No preparation or no stand tending.	Site preparation - Broadcast burn, mechanical site preparation. Stand tending - Precommercial thinning, weeding. Treated as separate individual effects. Lodgepole pine plantations.	Damage to lodgepole pine higher than other species. Western gall rust in 97% of sites, and 39% of lodgepole pine, most significant damaging agent. Western gall rust risk increased with increased soil moisture, northerly aspect, and mechanical site preparation. Precommercially thinned stands had lower risk than non-thinned.	4	Thinning (pre-commercial)	14	Western gall rust	NA	0	Increased	1	NA	0	NA	0	Not clear	Tree species
roach2015	Case study	Ceder-hemlock forests, British Colombia, Canada	Damage incidence - including disease, insect, weather and animal damage. Western gall rust (fungi) also tested seperately.	Statistical regression, correlative.	27 plots. 6 Circular 50m2 plots at each location, at 50m intervals along a transect.	Colombia basin - SE British Colombia. 1386 plantations.	No preparation or no stand tending.	Site preparation - Broadcast burn, mechanical site preparation. Stand tending - Precommercial thinning, weeding. Treated as separate individual effects. Lodgepole pine plantations.	Damage to lodgepole pine higher than other species. Western gall rust in 97% of sites, and 39% of lodgepole pine, most significant damaging agent. Western gall rust risk increased with increased soil moisture, northerly aspect, and mechanical site preparation. Precommercially thinned stands had lower risk than non-thinned.	4	Site prep: Mechanical site preparation	26	Western gall rust	NA	0	Reduced	5	NA	0	NA	0	Not clear	Tree species
robinson2003	Experiment	Australian eucalypt forests	Armillaria root disease - Armillaria luteobubalina (fungi)	Between site comparisons.	30x30m 28 plots. 10m wide buffer around plots.	9ha	4 plots unthinned.	Thinned to intensities: 200,400,600 stems/ha. Half fertilised with 400kg/ha nitrogen following thinning.	Sypmtoms found in every plot. After 10 years higher percetnage of trees infected in 200 and 600 fertilised plots than unfertilised plots of same thinning intensity. No difference of fertilisation in 400 or control plots. After 25 years no significant impact of fertilisation at any thinning intensity. After 10 years percentage of infected trees increased with thiining intensity, regardless of fert…	3	Thinning intensity	14	Armillaria root rot - Armillaria luteobubalina	NA	0	Reduced	5	NA	0	NA	0	Not clear	Thinning intensity; time after treatment	Association of tree mortality with Armillaria was less in higher thinning intensity treatment, but least with no thin.
robinson2003	Experiment	Australian eucalypt forests	Armillaria root disease - Armillaria luteobubalina (fungi)	Between site comparisons.	30x30m 28 plots. 10m wide buffer around plots.	9ha	4 plots unthinned.	Thinned to intensities: 200,400,600 stems/ha. Half fertilised with 400kg/ha nitrogen following thinning.	Sypmtoms found in every plot. After 10 years higher percetnage of trees infected in 200 and 600 fertilised plots than unfertilised plots of same thinning intensity. No difference of fertilisation in 400 or control plots. After 25 years no significant impact of fertilisation at any thinning intensity. After 10 years percentage of infected trees increased with thiining intensity, regardless of fert…	3	Addition: N fertiliser after thinning	17	Armillaria root rot - Armillaria luteobubalina	NA	0	Reduced (after 10 years); no effect (after 25 years)	6	No effect	3	NA	0	Not clear	Thinning intensity; time after treatment
ronnberg2000	Case study	Norway spruce cleared forests - Sweden	Root rot - Heterobadision annosum (fungi)	Statistical regression, correlative.	6 sites. 2 40x40m plots at each site. 53-188 stumps per plot.	Sweden - plots in north and south.	None	Classification of damage to stumps - undamaged, less than 25% root system damaged superficially, over 60% damaged or under 25% broken tissue damage, whole visible root system damaged.	Natural infection occurred at all sites, mean frequency 54%. Higher infection frequencies at damaged stump roots than stump surfaces. Taking into account area, infection on stump is 1, root is 0.45. Total area of infection at root disc 5.9% area of infection at stump surface.	4	Harvest: Severity of damage to stump roots	8	Heterobadision annosum - Root rot	NA	0	Reduced	5	NA	0	NA	0	Not clear	None	Seems to be reporting variation in infection between stump surface and roots, so cannot score against our four criteria. Put this as resistance, with the idea that if we are talking about resistance of the whole forest to infection, resistance is lower (or infection risk within the stand is higher) with damaged stumps.
rosenvald2015	Case study	Estonian deciduous forests, cut with retention trees left. Stands cut after 50-80 years.	Armillaria sp and H. fraxineus (fungi)	Statistical regression, correlative.	41 sites. Mean area 3ha (0.5-6.4ha). 577 (102 in diesease analysis) ash trees	104 sites in Estonia	None	Natural variation. Precut edge - next to long term open area, postcut edge - near uncut forest edge (both edges later pooled), centre.	Mean annual survival of reatined ash trees declined over 13 years, due to disease progression. Lower survial probability after 13 years in centre than precut edge, no difference in postcut edge. Centre trees showed higher crown damage at year 1 compared to either pre or post cut edge trees. After 13 years centre trees higher crown damage than precut edge, but not post cut edge, with largest decli…	4	Landscape: Forest edge (versus centre of patch)	22	Ash dieback - H. fraxineus - and Armillaria	NA	0	Increased	1	NA	0	NA	0	Not clear	Whether edge is "pre-cut" or "post-cut"	Unclear whether resistance or (counter-intuitive) effect on risk in. Separation of effects between the two very different pathogens is unclear. My reading of the paper suggests resistance
rosenvald2015	Case study	Estonian deciduous forests, cut with retention trees left. Stands cut after 50-80 years.	Armillaria sp and H. fraxineus (fungi)	Statistical regression, correlative.	41 sites. Mean area 3ha (0.5-6.4ha). 577 (102 in diesease analysis) ash trees	104 sites in Estonia	None	Natural variation. Precut edge - next to long term open area, postcut edge - near uncut forest edge (both edges later pooled), centre.	Mean annual survival of reatined ash trees declined over 13 years, due to disease progression. Lower survial probability after 13 years in centre than precut edge, no difference in postcut edge. Centre trees showed higher crown damage at year 1 compared to either pre or post cut edge trees. After 13 years centre trees higher crown damage than precut edge, but not post cut edge, with largest decli…	4	Landscape: Forest edge (versus centre of patch)	22	Armillaria sp and H. fraxineus (fungi)	NA	0	Increased	1	NA	0	NA	0	Not clear	Whether edge is "pre-cut" or "post-cut". Tree growth rate	Unclear whether resistance or (counter-intuitive) effect on risk in. Separation of effects between the two very different pathogens is unclear. My reading of the paper suggests resistance
rosso1998	Experiment	Douglas fir plantation, western Oregon USA	Armillaria root diesase - Armillaria ostoyae (fungi)	Experiment - between site comparisons	Unknown	4 sites 4.1-6.8ha	No fertilisation or pruning.	Thinning 300/ha, 604/ha, not thinned (3459/ha average). Fertilised, pruned, pruned and fertilised, control.	Armillaria primary cause of mortality. Disease incidence 2-20%. Highest at medium density, mid at low density, and lowest at high density plots, and vaired by treatment. No realtionship between tree disease incidence and tree growth at the plot level. Health of trees killed in 1987 showed decline in growth efficieny from 0.22kg/m2/year in 1983-85 to 0.16kg/m3/year 1985-1987. Decline also seen in …	3	Thinning intensity	14	Armillaria root rot - Armillaria ostoyae	NA	0	Non-linear: increased in highest intensity thinned and no-thin plots	6	NA	0	NA	0	Not clear	None	No realtionship between tree disease incidence and tree growth at the plot level. Trees that died had previously showed a decline in "growth efficiency", but so too had symptomatic trees that survived. The paper doesn't make it clear whether the living trees had 'survived' or just not died yet, growth decline may be them on the way to dying.
sakamoto2006	Experiment	Pine forests California	Fusarium circinatum - Pitch Canker Disease (fungi)	Experimental - wounding of trees	10 trees trees (or 5 where trees scarse)	Glasshouse and stands across single county	Wounding to non-innoculated branches. No bagging of innoculated branches. Branches unsprayed	Wounding to xylem 1.6 or 0.5mm and innoculated. Wounding at 1.6mm and innoculated, then sealed into bags to increase humidity. Branches sprayed with 1x10^7 or 5x10^7 spores ml^-1. Wounds made and innoculated at 0,7,14,21or28 days.	Large wounds higher infection than small wounds, with lowest in non-innocualted branches. No difference between humidified and non-humidified branches. More infection on branches with higher innoculum spray. Negative correlation between age of wound and infection frequency, though pathogen able to infect all ages of wound.	3	Microclim: Humidity (of bagged innoculated branch)	11	Fusarium circinatum - Pitch Canker Disease (fungi)	NA	0	No effect	3	NA	0	NA	0	Not clear	Time of day innoculated
sakamoto2006	Experiment	Pine forests California	Fusarium circinatum - Pitch Canker Disease (fungi)	Experimental - wounding of trees	10 trees trees (or 5 where trees scarse)	Glasshouse and stands across single county	Wounding to non-innoculated branches. No bagging of innoculated branches. Branches unsprayed	Wounding to xylem 1.6 or 0.5mm and innoculated. Wounding at 1.6mm and innoculated, then sealed into bags to increase humidity. Branches sprayed with 1x10^7 or 5x10^7 spores ml^-1. Wounds made and innoculated at 0,7,14,21or28 days.	Large wounds higher infection than small wounds, with lowest in non-innocualted branches. No difference between humidified and non-humidified branches. More infection on branches with higher innoculum spray. Negative correlation between age of wound and infection frequency, though pathogen able to infect all ages of wound.	3	Wound: Larger wound	13	Fusarium circinatum - Pitch Canker Disease (fungi)	NA	0	Reduced	5	NA	0	NA	0	Not clear	None
sakamoto2006	Experiment	Pine forests California	Fusarium circinatum - Pitch Canker Disease (fungi)	Experimental - wounding of trees	10 trees trees (or 5 where trees scarse)	Glasshouse and stands across single county	Wounding to non-innoculated branches. No bagging of innoculated branches. Branches unsprayed	Wounding to xylem 1.6 or 0.5mm and innoculated. Wounding at 1.6mm and innoculated, then sealed into bags to increase humidity. Branches sprayed with 1x10^7 or 5x10^7 spores ml^-1. Wounds made and innoculated at 0,7,14,21or28 days.	Large wounds higher infection than small wounds, with lowest in non-innocualted branches. No difference between humidified and non-humidified branches. More infection on branches with higher innoculum spray. Negative correlation between age of wound and infection frequency, though pathogen able to infect all ages of wound.	3	Wound: Greater age of wound	13	Fusarium circinatum - Pitch Canker Disease (fungi)	NA	0	Increased	1	NA	0	NA	0	Not clear	None
santini2003	Experiment	Pine forests, Italy. Plantations and semi-natural	Sphaeropsis sapineam, Leptographium serpens and Heterobasidion annosum (fungi)	Experimental - fungi persistance.	not specified	San Rossore forest	None	Innoculated branches left in 6 forest sites, including pure pine, and uneven aged pine mixed with broadleaf trees. Wood blocks innoculated and buried in sites with no understory trees or shrubs. Persistance of fungi in cones of varied age.	Fungi persisted in innoculated branches left in forest, with all branches showing symptoms after 12 months, and no differences due to stand type. In wood blocks on trees H. annosum was re-isolated after 1 and 2 months from all blocks, and only all pure pine plantations blocks after 3 months, with one mixed plantation block after 3 months not showing infection. S. sapinea found in 96% of pine cone…	3	Species mixture (confounded with uneven age)	2	Sphaeropsis sapineam, Leptographium serpens and Heterobasidion annosum (fungi)	NA	0	Increased (Weak evidence)	2	NA	0	NA	0	Not clear	Time since start of experiment	Concerned with pathogen persistance in system, not symptomatic trees
shaw2012	Experiment	Ponderosa pines-Douglas fir-Carex plant forest - Washington, USA	Armillaria root diesase - Armillaria ostoyae (fungi)	Experimental - between plot comparison.	Cells 3.3x3.3m, containing one tree after final thinning. Otherwise unspecified,	Single forest location, size unspecified	None	Root removal: Trees pushed over, roots removed by machine ripping and hand. Pushed over and roots removed by machine ripping. Pushed over and no root removal. Trees felled and skidded, no root removal. Saleable trees felled and sikkded, no root removal. Matirx of planting 6-10 years later: unthinned, thinned, planted. All then thinned to 3.6m spacing 21 years later.	More intense root removal associated with less disease occuarnace. But after 35 years even most intense still had 23% mortality, compared to 53% in no root removal.	3	Harvest: Root removal intensity (of trees that were "pushed over")	8	Armillaria root rot - Armillaria ostoyae	NA	0	Increased	1	NA	0	NA	0	Not clear	Time since start of experiment
simard2005	Experiment	Douglas fir and lodgepole pine plantation - mixed brodleaf or aspen - British Colombia, Canada	Armillaria root rot - Armillaria ostoyae (fungi)	Experiment - between site comparisons	0.9ha, 36 grid points within and nearest douglas fir or lodgepole pine sampled, and 10m2 plot around central tree.	15 sites, same region.	No management	Broadleaf: manual cutting, girdling or cut-stump glyphosphate.	Survival high over 5 years (85%). 5 years after girdling and cutting douglas fir survival reduced from control, but not seen when glyphosate added, decline mainly due to Armillaria, but mortality in control plot also increased over time, reducing the difference. Girdling showed slower increase in mortality due to slower death of girdled trees. For combined douglas fir and lodgepole pine showed in…	3	Thinning (of broadleaves in conifer stands)	14	Armillaria root rot - Armillaria ostoyae	NA	0	Reduced	5	NA	0	NA	0	Not clear	Glyphosate treatment of cut stumps (prevented the negative effect on resistance). Method of thinning: girdling slowed increase in mortality compared with cutting. Conifer tree species.	Response of conifers to thinning of broadleaves in their stands
studhammer2009	Experiment	Experimental loblolly and slash pine plantations. Florida, USA	Fusiform rust Fusarium circinatum (fungi)	Experimental - between plot comparison.	Narrow spacing 1.22mx2.75m between trees, eight beds of 16 trees, 128 trees/plot, 0.016ha. Wide spacing 2.75x2.75m between trees, eight beds ten trees, 80 trees per plot, 0.036ha.	Georgia and Florida, 4 sites.	None	Intensive (early and complete vegetation control, annual fertilisation) and operational (nutrient management) silviculture, split by high (2990trees/ha) and low (1334trees/ha) density planting. One family per plot, and one plot of mixutre of fast growing families. Trees planted at 1yr of age.	Little incidence of rust in any trees. Families chosen had high resistance, and silvicultural practises, location and spacing only increased disease presence at most by 1.8%	4	Tree density: planting density of young plantation	4	Fusarium circinatum - Fusiform rust	NA	0	No effect	3	NA	0	NA	0	No effect	Height	NB all planting stock was of families selected for high resistance.
studhammer2009	Experiment	Experimental loblolly and slash pine plantations. Florida, USA	Fusiform rust Fusarium circinatum (fungi)	Experimental - between plot comparison.	Narrow spacing 1.22mx2.75m between trees, eight beds of 16 trees, 128 trees/plot, 0.016ha. Wide spacing 2.75x2.75m between trees, eight beds ten trees, 80 trees per plot, 0.036ha.	Georgia and Florida, 4 sites.	None	Intensive (early and complete vegetation control, annual fertilisation) and operational (nutrient management) silviculture, split by high (2990trees/ha) and low (1334trees/ha) density planting. One family per plot, and one plot of mixutre of fast growing families. Trees planted at 1yr of age.	Little incidence of rust in any trees. Families chosen had high resistance, and silvicultural practises, location and spacing only increased disease presence at most by 1.8%	4	Silviculture: Intensity of silviculture (diverse components) of young plantation	10	Fusarium circinatum - Fusiform rust	NA	0	No effect	3	NA	0	NA	0	No effect	Height	NB all planting stock was of families selected for high resistance.
swiecki2003	Case study	Mixed hardwood forests, California, USA	Phytophthora ramorum (oomycete)	Statistical regression, correlative.	8m radius, 0.02ha. 10 plots.	Two sites	None	Natural variation in bay laurrel cover.	Less percentage infection and severity of infection in trees with bay laurel more than 1.5m distant. Disease further progressed on oaks with bay laurel foliage within 1.5m. Mortality highest in trees with bay laurel 0.5m from trunk.	3	Tree diversity: Alternative host	3	Phythophthora ramorum	NA	0	Decreased	5	NA	0	NA	0	Not clear	None
tarigan2011		Acacia forest, Indonesia	Ceratocystis acaciivora and Lasiodiplodia theobromae (fungi)		20 of each species in each treatment. 480 trees in all, plus 80 control trees.		Pruning wound sprayed with sterile water. (Poor control? This would test the impact of the innculation method, not pruning)	Pruning of 1 year old Acacia mangium and A. crassicarpa. Pruned above branch collar, not tearing bark, or pruned on the branch collar, creating a flap of torn bark. Wounds innoculated.	Lesions present after 5 weeks, with C. acaciivora larer lesions. L theobromae innoculated trees did not differ from controls, and both pruning methods resulted in lesions. Rough pruning larger lesions than careful pruning. C acaciivora lesions 81mm-160mm in careful pruning, and 315-450mm in rough pruning. L. theobromae 11-17mm in careful pruning, and 185-372mm in rought pruning.	3	Pruning: Care of pruning (position and tearing of the bark)	15	Ceratocystis acaciivora and Lasiodiplodia theobromae (fungi)	NA	0	Increased	1	NA	0	NA	0	Size of lesions, after innoculation of the pruning wound	Tree species
thies2005	Experiment	Douglas fir stands Orgeon and Washington, USA	Laminated root rot Phellinus weirii (fungi)	Between site comparisons - experimental	Apiary - 4.5ha clearcut, 5 blocks. Gates - 6.1ha clearcut, 7 blocks. Hoodsport - 3.8ha clearcut, 5 blocks. La Grande - 5.5ha clearcut, 7 blocks. Sweethome - 4.9ha clearcut, 6 blocks. Each block 8 plots, of 0.04ha circular, containing 34 seedlings after thinning, ~2.4m spacing between trees.	5 stands across two states - Regional.	No stumping or fertilisation.	Clearcutting and stumps tested for infection. Stumping. 4 levels of fertilisation: none, 336kg N/ha, 672kg N/ha, 1345kg N/ha. In all possible combinations, 1 per plot per block. Seedlings planted at 2200 seedlings/ha, thinned to 1700/ha after ~5 years.	Stumping siginificant increase in height of seedlings at Hoodsport only, fertilisation no impact on height in any area at 5 years. Seedling mortality due to pathogen significantly reduced in all sites stumped, regardless of fertilisation, 2.4% on stumped, 9.1% on unstumped at 5 years. Stumping reduced diesase incidence, but didn't remove it.	4	Stump removal after clearcutting	8	Laminated root rot - Phellinus weirii (fungi)	NA	0	Increased	1	NA	0	NA	0	Not clear	None	Response of seedlings, ? Planted
thies2005	Experiment	Douglas fir stands Orgeon and Washington, USA	Laminated root rot Phellinus weirii (fungi)	Between site comparisons - experimental	Apiary - 4.5ha clearcut, 5 blocks. Gates - 6.1ha clearcut, 7 blocks. Hoodsport - 3.8ha clearcut, 5 blocks. La Grande - 5.5ha clearcut, 7 blocks. Sweethome - 4.9ha clearcut, 6 blocks. Each block 8 plots, of 0.04ha circular, containing 34 seedlings after thinning, ~2.4m spacing between trees.	5 stands across two states - Regional.	No stumping or fertilisation.	Clearcutting and stumps tested for infection. Stumping. 4 levels of fertilisation: none, 336kg N/ha, 672kg N/ha, 1345kg N/ha. In all possible combinations, 1 per plot per block. Seedlings planted at 2200 seedlings/ha, thinned to 1700/ha after ~5 years.	Stumping siginificant increase in height of seedlings at Hoodsport only, fertilisation no impact on height in any area at 5 years. Seedling mortality due to pathogen significantly reduced in all sites stumped, regardless of fertilisation, 2.4% on stumped, 9.1% on unstumped at 5 years. Stumping reduced diesase incidence, but didn't remove it.	4	Addition: N fertiliser after clearcutting	17	Laminated root rot - Phellinus weirii (fungi)	NA	0	No effect	3	NA	0	NA	0	Not clear	none	Response of seedlings, ? Planted
thor2005	Experiment	Norway Spruce stands, Sweden	Heterobasidion annosum (fungi)	Experiment - between site comparisons	38-54m2, 20-40 stumps at each plot	Single forest		Urea application to stumps, P. Gigantea application to stumps, mechanical treatment of stumps, not treatment summer thinned, no treatment winter thinned, unthinned.	Large variation in infection between sites. Infection probabily was highest in summer plots, and higher in P. gigantea treated plots than urea or winter cut plots. Chemical treatment decreased probability of infection compared to mechanical treatment. When possible outlier removed all stump treatments and winter thinning reduced stump area colonised by pathogen compared to summer thinning, with n…	3	Stump treatment	8	Heterobasidion annosum	NA	0	Inceased	1	NA	0	NA	0	Not clear	None
thor2005	Experiment	Norway Spruce stands, Sweden	Heterobasidion annosum (fungi)	Experiment - between site comparisons	38-54m2, 20-40 stumps at each plot	Single forest		Urea application to stumps, P. Gigantea application to stumps, mechanical treatment of stumps, not treatment summer thinned, no treatment winter thinned, unthinned.	Large variation in infection between sites. Infection probabily was highest in summer plots, and higher in P. gigantea treated plots than urea or winter cut plots. Chemical treatment decreased probability of infection compared to mechanical treatment. When possible outlier removed all stump treatments and winter thinning reduced stump area colonised by pathogen compared to summer thinning, with n…	3	Timing of thinning (winter vs summer)	14	Heterobasidion annosum	NA	0	Inceased	1	NA	0	NA	0	Not clear	None	Increased resistance with winter thinning
urbina2006	Case study	Spain pin forests. Atlantic climate region.	Red band needle blight Dothistroma septosporum and D. pini. Brown spot needle blight Lecansticta acicola (fungi)	Statistical regression, correlative.	Average 2.25ha. 311 plots, randomly along accessible tracks. Needle sampled from 5 to 10 trees per plot.% impacted across whole plot.	1650km2	NA	Pruning of live and dead branches. Thinning. Removal of dead 'waste'.	No impact of silivcilture measures on severity of disease.	3	Thinning	14	Red band needle blight Dothistroma septosporum and D. pini. Brown spot needle blight Lecansticta acicola (fungi)	NA	0	No effect	3	NA	0	NA	0	No effect	None
urbina2006	Case study	Spain pine forests. Atlantic climate region.	Red band needle blight Dothistroma septosporum and D. pini. Brown spot needle blight Lecansticta acicola (fungi)	Statistical regression, correlative.	Average 2.25ha. 311 plots, randomly along accessible tracks. Needle sampled from 5 to 10 trees per plot.% impacted across whole plot.	1650km2	NA	Pruning of live and dead branches. Thinning. Removal of dead 'waste'.	No impact of silivcilture measures on severity of disease.	3	Thinning: Removal of "dead waste" (brash)	14	Red band needle blight Dothistroma septosporum and D. pini. Brown spot needle blight Lecansticta acicola (fungi)	NA	0	No effect	3	NA	0	NA	0	No effect	None
urbina2006	Case study	Spain pin forests. Atlantic climate region.	Red band needle blight Dothistroma septosporum and D. pini. Brown spot needle blight Lecansticta acicola (fungi)	Statistical regression, correlative.	Average 2.25ha. 311 plots, randomly along accessible tracks. Needle sampled from 5 to 10 trees per plot.% impacted across whole plot.	1650km2	NA	Pruning of live and dead branches. Thinning. Removal of dead 'waste'.	No impact of silivcilture measures on severity of disease.	3	Pruning of live and dead branches	15	Red band needle blight Dothistroma septosporum and D. pini. Brown spot needle blight Lecansticta acicola (fungi)	NA	0	No effect	3	NA	0	NA	0	No effect	None
valachovic2013	Experiment	Coastal forests - California (med)	Phytophthora ramorum (oomycete)	Experiment - between site comparisons	0.04ha sampled. Larger area treated.	Single region	None	Removal of bay laurel and tanoak, or with boradcast burning, or just bay laureal, or girdling of bay laurel and feul reduction thinning	Bay laurel within 50m of sample significantly increases probabilty of becoming infected.	3	Host removal	3	Phytophthora ramorum	NA	0	Decreased	5	NA	0	NA	0	Not clear	None
valachovic2013a	Experiment	Coastal forests - California (med)	Phythophthora ramorum (oomycete)	Experiment - between site comparisons	90 stumps	Single region	No treatment	Cutting of stems from stumps.	Treated stumps lower infection rate than untreated, though in many plots no differene observed.	3	Stump treatment	8	Phytophthora ramorum	NA	0	Increased	1	NA	0	NA	0	Not clear	Site
ward2010	Case study	Appalachian hardwood forests	Nectria canker - Neonectria ditissima (fungi)	Between site comparisons.	20x20m on each 4.4ha 1852 plots total 1934-1935. 309 plots total 1995-2005.	1934-1935 - 12 state forests in Connecticut. 6938 black birch trees, 4117 yellow birch trees. 50.8ha. 1995-2005 - 31 study sites.	No clearcutting	Clearcutting.	Incidence greater in 1935 than 2005, but no change in severity. Older trees more infected than younger in 1935 and 2005. Canker incidence higher in mid-age trees where the area had been clearcut within 50 years than on same age trees in unmanaged plots.	4	Harvest: Clearcutting (versus no cutting)	7	Nectria canker - Neonectria ditissima (fungi)	NA	0	Reduced (weak evidence)	4	NA	0	NA	0	Not clear	Tree age
whitney2005	Case study	Ontario. Mixedwood forest, spruce dominated. Logged at 90-100 years and replanted.	Armillaria root disease - Armillaria ostoyae (fungi)	BACI	Not stated	Not stated	Un-burnt, planted as management plot.	Burning prior to replanting. Planted with white spruce, black spruce, jack pine and balasm fir of 10-20cm height. Planted around 50 stumps with known infection. 1 seedling of each species per stump.	No significant difference in mortality by root diease 10 years after planting between burned and un-burned. Trees did not vary in height between sites overall.	2	Burning (prior to replanting)	18	Armillaria root rot - Armillaria ostoyae	NA	0	No effect	3	NA	0	NA	0	No effect	Tree species
wingfield1994	Case study	South African forests	Rhizina undulata (fungi). Sphaeropsis sapinea.	Reporting on anecdotal evidence.	not specified	South Africa	None	Burning.	Burning increases incidence of R. undulata due to heat activation, both for seedlings and surviving adult trees. But not burning presents habitat for insect pest species (e.g. Hylastes angustatus).	1	Burning	18	Rhizina undulata (fungi). [Sphaeropsis sapinea].	NA	0	Reduced	5	NA	0	NA	0	Heat activates pathogen	None	But not burning increases habitat for insect pests.
oliva2010	Case study	P. abies forests, Sweden. On forestry or former agricultural land	Heterobasidion annosum (fungi)	Experiment - between site comparisons	720m2	11 Plantations.	No thinning. No stump removal.	Urea application to stumps, P. Gigantea application to stumps, mechanical treatment of stumps, not treatment summer thinned, no treatment winter thinned. Second thinning carried out in 8 sites.	No difference in H. annosum isolated in trees on agricultural or former forestry land.	3	Previous site use (agriculture vs forest)	26	Heterobasidion annosum	NA	0	Inceased	1	NA	0	NA	0	Not clear	None	Same plots as thor2005
oliva2010	Case study	P. abies forests, Sweden. On forestry or former agricultural land	Heterobasidion annosum (fungi)	Experiment - between site comparisons	720m2	12 Plantations.	No thinning. No stump removal.	Urea application to stumps, P. Gigantea application to stumps, mechanical treatment of stumps, not treatment summer thinned, no treatment winter thinned. Second thinning carried out in 8 sites.	Summer thined plots higher disease incidence than urea treated plots, and winter thinned plots. If accounting for previus infection rates this difference was only apparent on former agricultural land.	3	Stump treatment	8	Heterobasidion annosum	NA	0	Inceased	1	NA	0	NA	0	Not clear	None	Same plots as thor2005
lygis2004	Case study	Mixed Pinus slyvestris forests, Lithuania	Heterobasidion annosum (fungi)	Experiment - between site comparisons	20x20m	6.9ha	Pure pine stands	Plots with mixed species of P. slyvestris, A. fruticosa and B. pendula	No infection in plantations.	3	Species mixture	2	Heterobasidion annosum	NA	0	No effect	3	NA	0	NA	0	Not clear	None	No infection was recorded in any trees.
swedjemark1993	Case study	P. abies forests, Sweden	Heterobasidion annosum (fungi)	Experiment - between site comparisons	550m2 - 1500m2 in site 1. Site 2 whole 2ha plot.	9ha		Thinning leaving 60% planted stems, no large machinery. Second plot thinned and treated with Urea for half the stumps.	In stand 1 higher liklihood of infection if closer to infected stump, but only in one plot.	3	Thinning, retained stumps.	14	Heterobasidion annosum	NA	0	Increased (weak evidence)	2	NA	0	NA	0	Not clear	None
oliva2008	Case study	P. abies forests, Sweden	Heterobasidion annosum (fungi)	Experiment - between site comparisons	20mx20m, 16 plots	2 forests sites	No stump treatment following thinning	Stumps treated with urea, artifical infection, 50% treatment/infection.	Urea treated plots lower mortality than both infected and natural infection plots. Rotted trees also lower in urea plots. Lowest incidence of H. annosum in urea plots.	3	Thinning, retained stumps.	14	Heterobasidion annosum	Increased	1	NA	0	NA	0	NA	0	Not clear	None
bendz1998	Case study	P. abies forests, Sweden	Heterobasidion annosum (fungi)	Experiment - between site comparisons	730 stumps, plot size unclear	5 sites		Clear cut, thinning or pre-commercial thinning. Natural infection and innoculation.	Clearcut stumps had less infection than thinning stumps. , in terms of number and heart and sapwood infection.	1	Stump treatment	14	Heterobasidion annosum	Increased	1	NA	0	NA	0	NA	0	Not clear	None	Only measured infection in stumps, not trees.
halmschlager2017	Experiment	Norway spruce, Austria	Sirococcus shoot blight (fungi)	Experiment - individual tree comparisons	72 individual trees	1 site	No fertilisation	Fertilisation with either dolomitirc liming or gypsum and kieserite	Liming increased disease severity in first two years, but after this fertilised trees always lower disease severity than unfertilised trees, with gypsum and kieserite having larger impacts.	3	Fertilisation	17	Sirococcus	NA	0	Increase	1	NA	0	NA	0	Not clear	Year after fertilisation
thies2006	Experiment	P. menziesii (Douglas Fir)	Phellinus weirii (Laminated root rot, fungi)	Experiment - between plot comparisons	0.02ha circular - around infected stump	52.3ha clear cut	No fertiliser	Douglas fir seedlings planted around infected stump. 224 kg K per ha, 448 kg K per ha, or 224kg K per ha and 224kg N per ha.	No difference in mortality from LRR between treatments	3	Fertilisation	17	Phellinus weirii	NA	0	No impact	3	NA	0	NA	0	Not clear	None
anglberger2003	Experiment	Norway spruce, Austria	Sirococcus shoot blight (fungi)	Experiment	270m x 70m, single plot, sample plots 7m radius	1 site, 5ha uniform stand	No ferliser	Slow release fertiliser	Lower disease severity on fertilised plots than unfertilised, although not lower incidence of disease	3	Fertilisation	17	Sirococcus	NA	0	Increase	1	NA	0	NA	0	Not clear	None
filip2002	Experiment	Mixed conifer forest, Oregon	Armillaria Root disease	Experiment	64 x x4ha	4x 16ha blocks	No fertiliser	1) Urea, 350kg/ha N. 2) 100kg/ha N, 25kg/ha P, 25kg/ha K, 25kg/ha S. 3) 300kg/ha N, 75kg/ha P. 75kg/ha K, 75kg/ha S	No impact on mortality	3	Fertilisation	17	Armillaria	NA	0	No effect	3	NA	0	NA	0	Not clear	None

## Sheet: treatment_code
1	Species identity
2	Species mixture
3	(Co-)host species presence/abundance
4	Tree density
5	Canopy cover
6	Age/structural heterogeneity
7	Harvesting (disturbance) intensity
8	Harvesting (stump/root removal)
9	Harvesting (disturbance) area
10	Greater forest management
11	Microclimate - humidity/soil moisture
12	Microclimate - temperature
13	Wounding of stems/leaves
14	Thinning
15	Pruning
16	Vegetation removal
17	Addition (fertilizer, mulch, soil fertility)
18	Burning
19	Insect vector control
20	Landscape - patch area
21	Landscape - connectivity
22	Landscape - edge effects
23	Accessibility (water)
24	Accessibility (foot)
25	Accessibility (road/vehicle)
26	Soil preparation
27	Tree establishment
28	Landscape vegetation

## Sheet: effect_code
0	Not considered
1	Clear positive
2	Weak positive
3	No effect
4	Weak negative
5	Clear negative
6	Mixed

## Sheet: reliability_applicability_code
1	Descriptive paper, lab based only, or only considered with environmental pathogen presence (not impact on trees)
2	Quantative paper, correlative and considering only a single site.
3	Quantative paper, correlative or experiment, considering multiple sites within an single forest.
4	Quantative paper, correlative or experiment, considering multiple sites within multiple forests.
